# Supplementary material for: Reactivity of copper(ii)-alkylperoxo complexes
Source: Royal Society of Chemistry journal article supplement (doi:10.1039/c1dt10656b), 2011-01-01
Supplement: c1dt10656b.pdf [file c1dt10656b.pdf]

**Electronic supplementary information (ESI)**

For

**Reactivity of Copper(II)-Alkylperoxo Complexes**

**Tetsuro Tano,<sup>a</sup> Mehmed Z. Ertem,<sup>b</sup> Satoru Yamaguchi,<sup>c</sup> Atsushi Kunishita,<sup>a</sup> Hideki Sugimoto,<sup>a</sup>  
Nobutaka Fujieda,<sup>a</sup> Takashi Ogura,<sup>\*c</sup> Christopher J. Cramer<sup>\*b</sup> and Shinobu Itoh<sup>\*a</sup>**

*<sup>a</sup>Department of Material and Life Science, Division of Advanced Science and Biotechnology,  
Graduate School of Engineering, Osaka University, 2-1 Yamada-oka, Suita, Osaka 565-0871, Japan.*

*E-mail: shinobu@mls.eng.osaka-u.ac.jp*

*<sup>b</sup>Department of Chemistry and Research Computing Center, University of Minnesota, 207 Pleasant  
St. SE, Minneapolis, MN 55455, USA. E-mail: cramer@umn.edu*

*<sup>c</sup>Research Institute of Picobiology, Graduate School of Life Science, University of Hyogo, 3-2-1  
Kouto, Kamigori-cho, Ako-gun, Hyogo 678-1297, Japan. E-mail: ogura@sci.u-hyogo.ac.jp*

Fig. S1

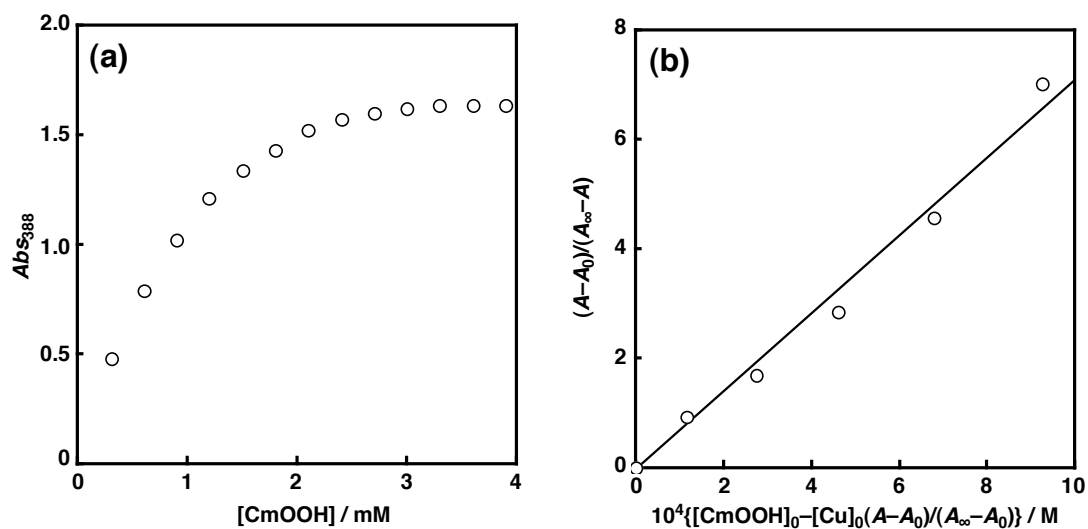

**Fig. S1.** (a) Spectrophotometric titration for the formation of cumylperoxo copper(II) complex from the reaction of  $1a^H$  (1.0 mM) and CmOOH in the presence of  $Et_3N$  (10 mM) in  $CH_3CN$  at  $-40^\circ C$ . (b) Plot of  $(A - A_0)/(A_\infty - A)$  against  $10^4\{[CmOOH]_0 - [Cu]_0(A - A_0)/(A_\infty - A_0)\} / M$ .

Fig. S2 and S3

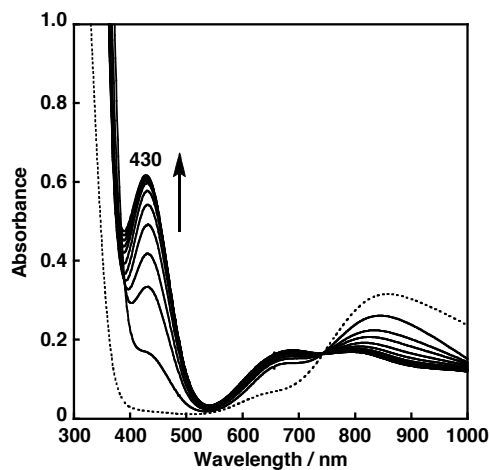

Fig. S2 Spectral change for the reaction of **1b** (1.0 mM) with CmOOH (2.5 mM) in the presence of Et<sub>3</sub>N (10 mM) in CH<sub>3</sub>CN at -40°C.

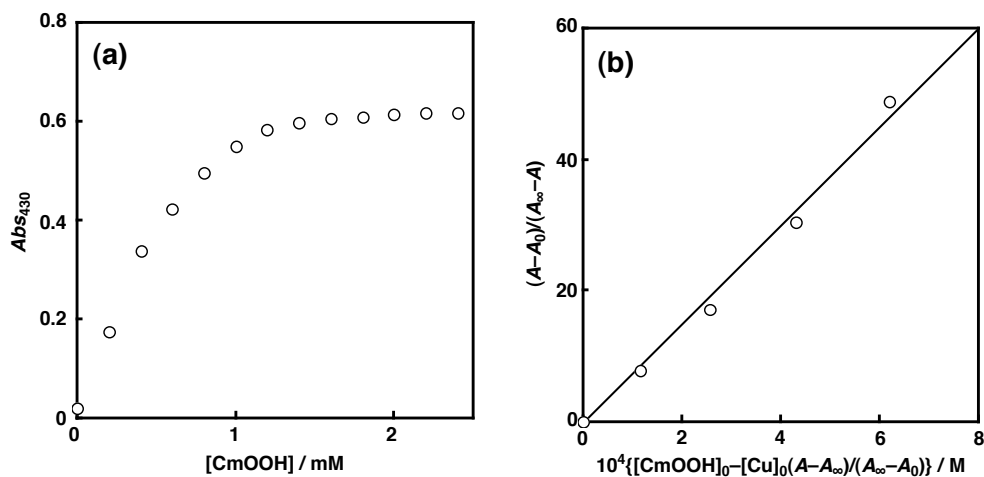

Fig. S3 (a) Spectrophotometric titration for the formation of cumylperoxo copper(II) complex from the reaction of **1b** (1.0 mM) and CmOOH in the presence of Et<sub>3</sub>N (10 mM) in CH<sub>3</sub>CN at -40°C. (b)  $(A - A_0)/(A_\infty - A)$  against  $\{[CmOOH]_0 - [Cu]_0(A - A_0)/(A_\infty - A_0)\}$ .

**Fig. S4**

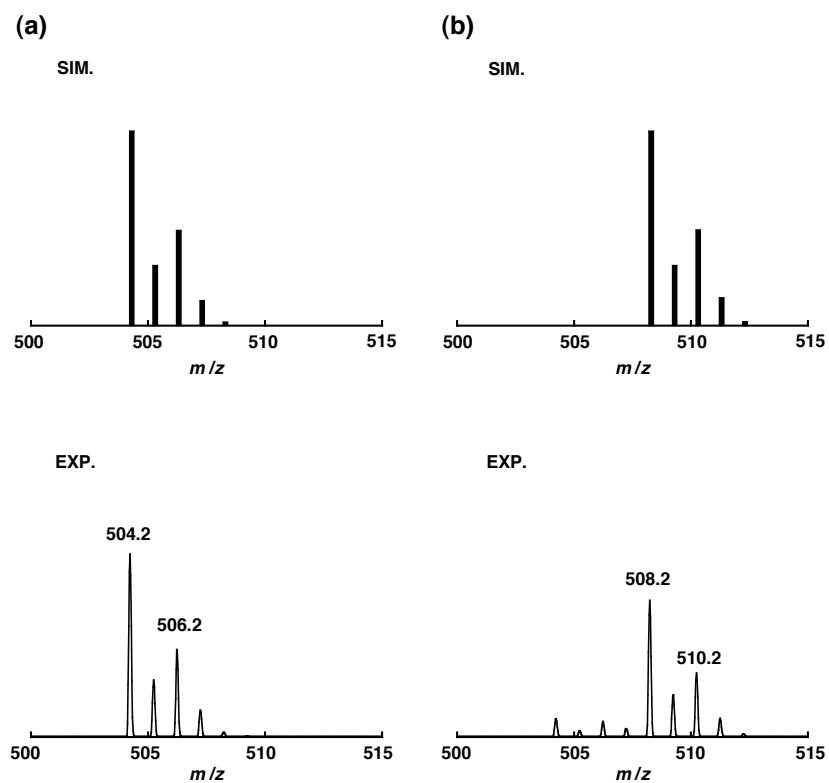

**Fig. S4** Experimental (bottom) and simulated (top) peak envelopes in the positive-ion ESI-MS spectra of the product derived from the reaction of **1b** (1.0 mM) with CmOOH (1.0 mM) in the presence of Et<sub>3</sub>N (1.0 mM) in CH<sub>3</sub>CN at -40°C; (a) with Cm<sup>16</sup>O<sub>2</sub>H and (b) with Cm<sup>18</sup>O<sub>2</sub>H.

**Fig. S5**

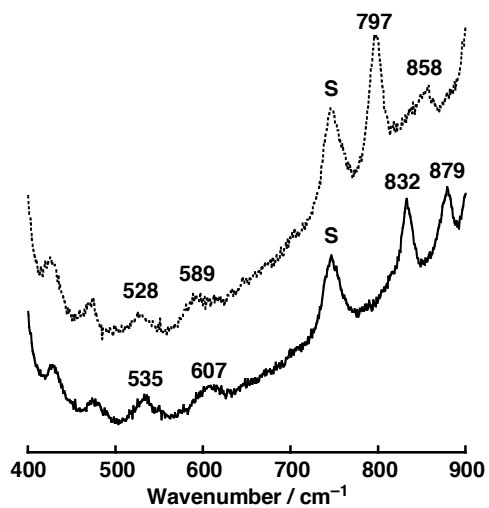

**Fig. S5** Resonance Raman spectra of the product derived from the reaction of **1b** (4.0 mM) with CmOOH (12 mM) in the presence of Et<sub>3</sub>N (40 mM) generated by using Cm<sup>16</sup>O<sub>2</sub>H (solid line, below) and Cm<sup>18</sup>O<sub>2</sub>H (dotted line, above) obtained with  $\lambda_{\text{ex}} = 441.6$  nm in CH<sub>3</sub>CN -40°C; s denotes the solvent band.

**Fig. S6**

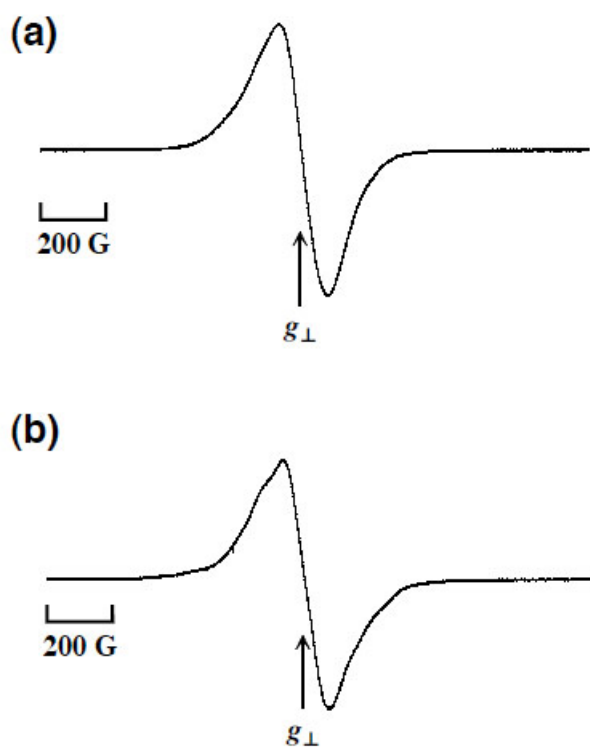

**Fig. S6** (a) ESR spectrum of **1b** (starting material) ( $2.0 \times 10^{-3}$  M) in  $\text{CH}_3\text{CN}$  at  $-196^\circ\text{C}$ . ESR parameter  $g_{\perp} = 2.112$ . (b) ESR spectrum of the **2b** generated in the reaction of **1b** ( $2.0 \times 10^{-3}$  M) and  $\text{CmOOH}$  ( $1.0 \times 10^{-2}$  M) in the presence of  $\text{Et}_3\text{N}$  ( $2.0 \times 10^{-3}$  M) in  $\text{CH}_3\text{CN}$  at  $-196^\circ\text{C}$ . ESR parameters  $g_{\perp} = 2.118$ . Low resolution of the spectrum prohibits precise assignment of the  $g_{\parallel}$  value.

**Fig. S7**

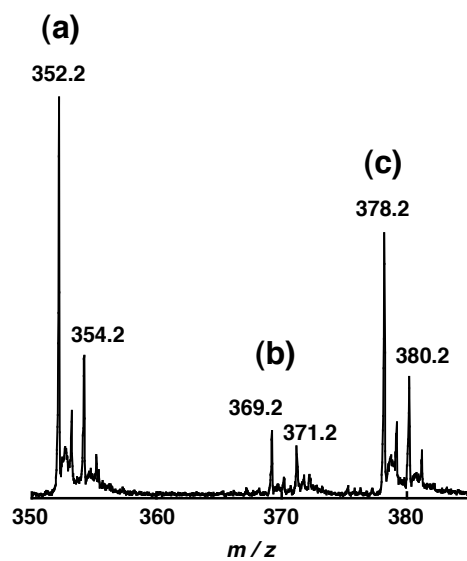

**Figure S7.** ESI-MS (pos.) spectrum after the self-decomposition of  $2\mathbf{a}^{\text{H}}$  in  $\text{CH}_3\text{CN}$ . (a)  $m/z = 352.2$  ( $[\text{Cu}^{\text{I}}(\text{bpa}^{\text{H}})]^+$ ), (b)  $m/z = 369.2$  ( $[\text{Cu}^{\text{II}}(\text{bpa}^{\text{H}})(\text{OH})]^+$ ), (c)  $m/z = 378.2$  ( $[\text{Cu}^{\text{II}}(\text{bpa}^{\text{H}})(\text{CN})]^+$ ).

**Fig. S8**

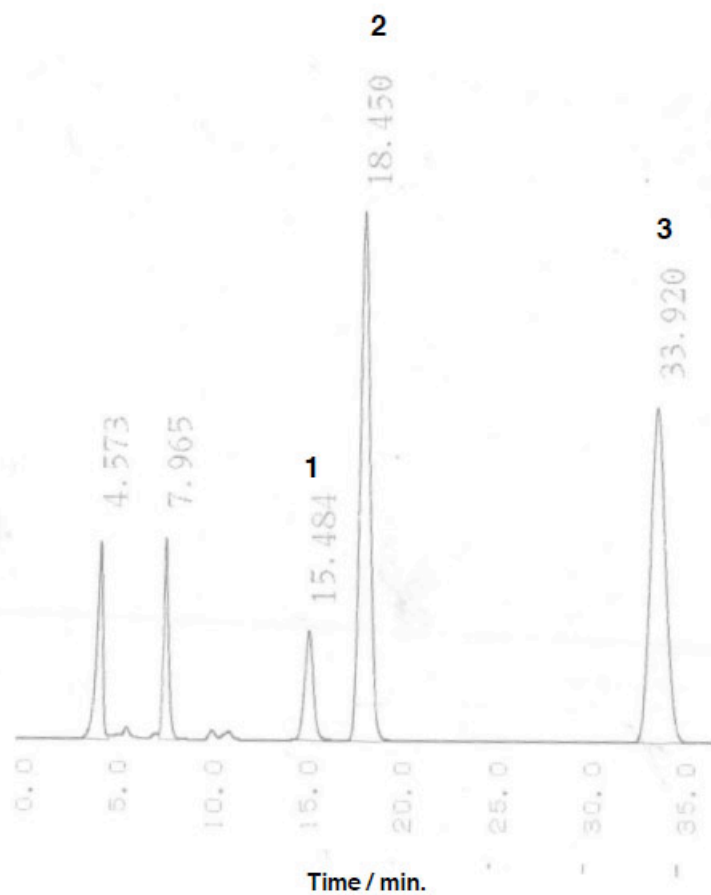

**Fig. S8** HPLC diagram of the self-decomposition products of **2a**. Peak 1: cumyl alcohol (CmOH); peak 2: acetophenone (PhCOMe); peak 3: anisole (internal standard material).



**Fig. S9**

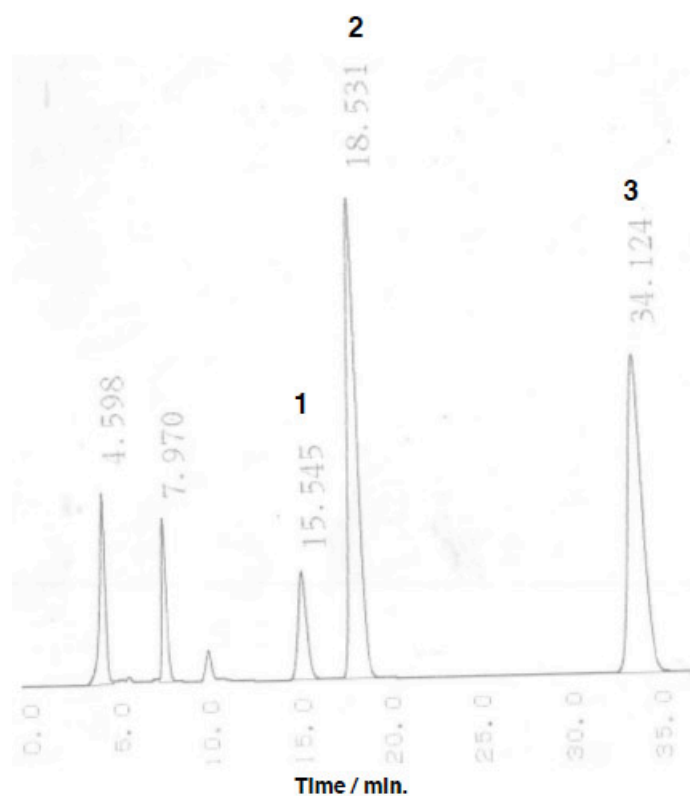

**Fig. S9** HPLC diagram of the self-decomposition products of **2b**. Peak 1: cumyl alcohol (CmOH); peak 2: acetophenone (PhCOME); peak 3: anisole (internal standard material).

**Fig. S10**

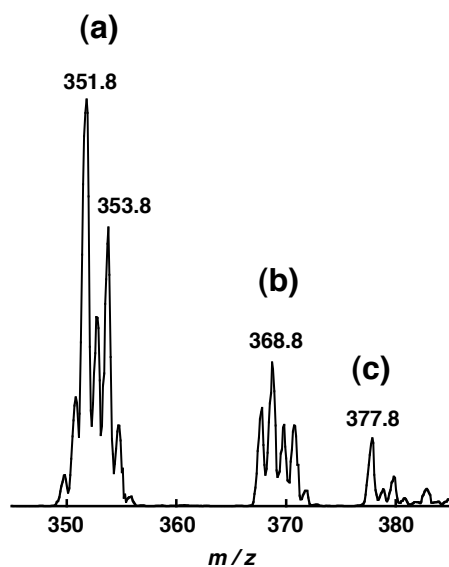

**Fig. S10** ESI-MS (pos.) spectrum of the final reaction mixture of **2a** and CHD. (a)  $m/z = 351.8$  ( $[\text{Cu}^{\text{I}}(\text{bpa})]^+$ ), (b)  $m/z = 368.8$  ( $[\text{Cu}^{\text{II}}(\text{bpa})(\text{OH})]^+$ ), (c)  $m/z = 377.8$  ( $[\text{Cu}^{\text{II}}(\text{bpa})(\text{CN})]^+$ ).

**Fig. 11**

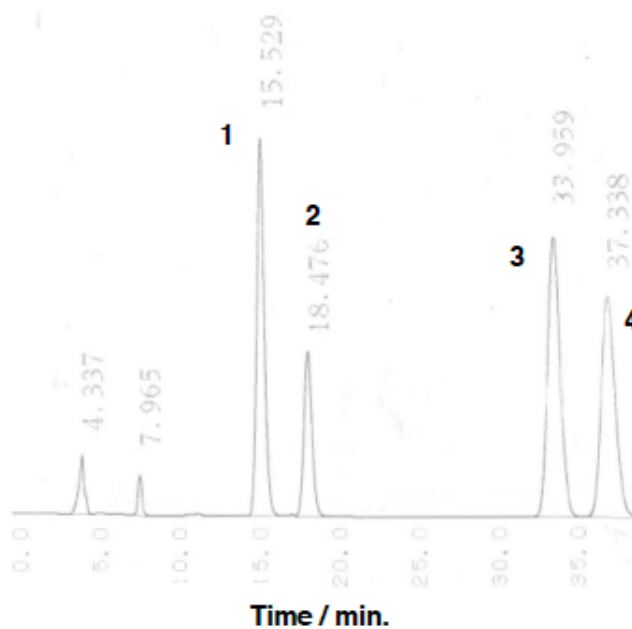

**Fig. S11** HPLC diagram of the products derived from the reaction of **2a** and CHD. Peak 1: cumyl alcohol (CmOH); peak 2: acetophenone (PhCOMe) ; peak 3: anisole (internal standard material); peak 4: benzene.

**Fig. S12**

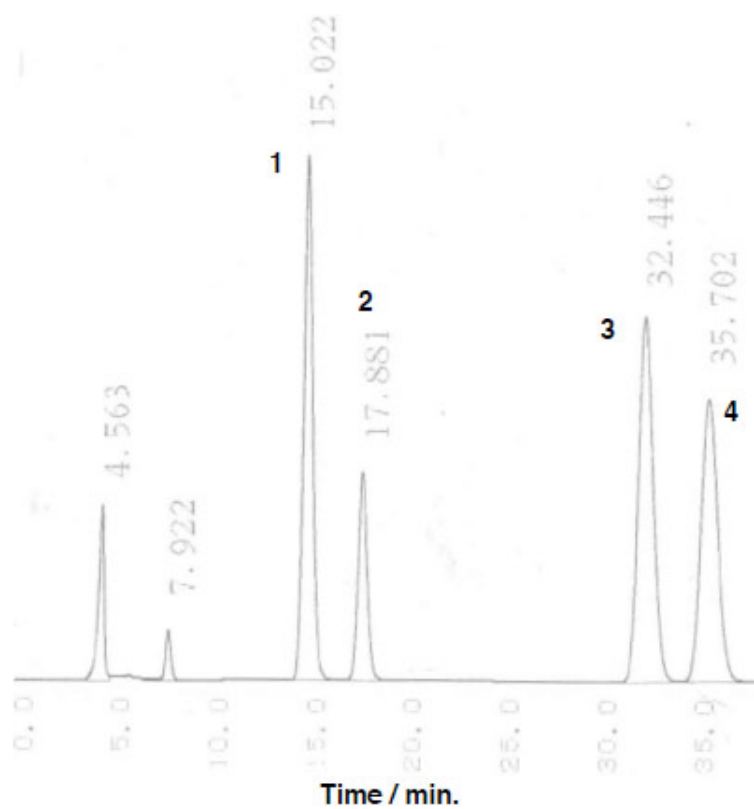

**Fig. S12** HPLC diagram of the products of derived from the reaction of **2b** and CHD. Peak 1: cumyl alcohol (CmOH); peak 2: acetophenone (PhCOMe); peak 3: anisole (internal standard material); peak 4: benzene.

Fig. S13

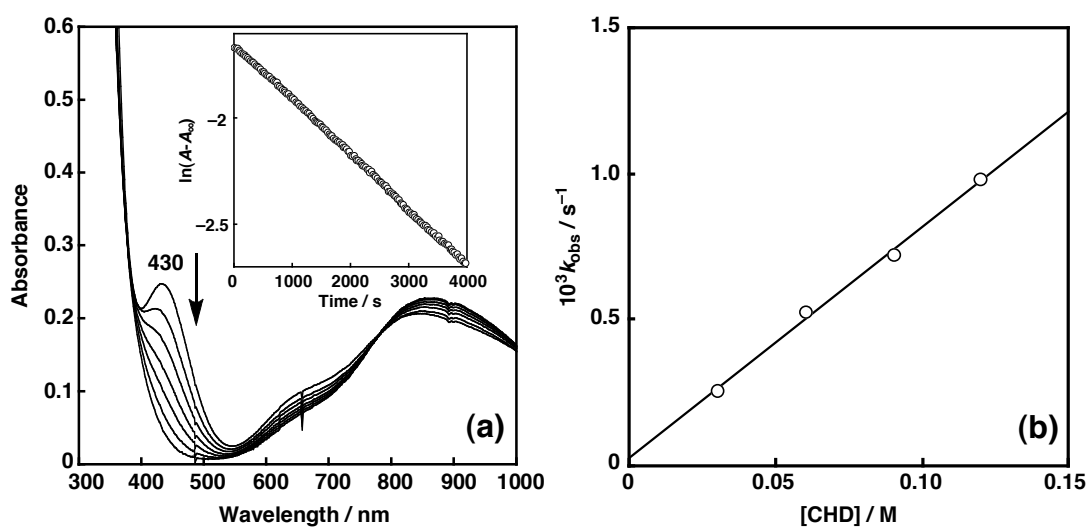

**Fig. S13** (a) Spectral change for the reaction of **2b** (1.0 mM) and CHD (30 mM) in  $\text{CH}_3\text{CN}$  at 30 °C under anaerobic conditions; Inset: the pseudo-first-order plot based on the absorption change at 430 nm. (b) Plots of  $k_{\text{obs}}$  vs substrate concentration for the reaction of **2b** with CHD.

## DFT calculation results

### I – Cartesian Coordinates (ang) and Energies ( $E_h$ , doublet electronic states)

#### 1) – $[\text{Cu}^{\text{II}}(\text{bpa})(\text{CH}_3\text{CN})]^{2+}$

Energy: -1229.29162036 a.u.

|    |             |             |             |
|----|-------------|-------------|-------------|
| C  | -1.90034300 | -2.91672300 | -0.40538600 |
| C  | -1.59170000 | -4.26747700 | -0.36107500 |
| C  | -0.40265500 | -4.66204100 | 0.24649700  |
| C  | 0.43989600  | -3.69295600 | 0.78585100  |
| C  | 0.06858400  | -2.35762000 | 0.71358200  |
| N  | -1.09166900 | -1.98149700 | 0.12370600  |
| H  | -0.12953700 | -5.71357900 | 0.29426500  |
| H  | -2.81073400 | -2.55225200 | -0.87499000 |
| H  | -2.27131500 | -4.99213000 | -0.80015800 |
| H  | 1.37853200  | -3.96789800 | 1.26247100  |
| C  | 0.87213900  | -1.23935700 | 1.30959800  |
| H  | 0.54770700  | -1.06208700 | 2.34422700  |
| H  | 1.94450600  | -1.47578500 | 1.34735200  |
| N  | 0.63393900  | -0.00040100 | 0.53733000  |
| C  | 0.87280900  | 1.23811200  | 1.31010500  |
| H  | 1.94531500  | 1.47388400  | 1.34805200  |
| H  | 0.54817300  | 1.06063000  | 2.34463500  |
| C  | 0.06999200  | 2.35709000  | 0.71443600  |
| C  | 0.44209100  | 3.69217800  | 0.78726000  |
| N  | -1.09039500 | 1.98187900  | 0.12424800  |
| C  | -0.39978800 | 4.66196100  | 0.24811400  |
| H  | 1.38081200  | 3.96638300  | 1.26413500  |
| C  | -1.89840300 | 2.91777600  | -0.40466900 |
| C  | -1.58895200 | 4.26832800  | -0.35983200 |
| H  | -0.12605100 | 5.71331900  | 0.29631300  |
| H  | -2.80889200 | 2.55398500  | -0.87462300 |
| H  | -2.26802500 | 4.99355100  | -0.79881100 |
| C  | 1.36894100  | -0.00033000 | -0.79820300 |
| H  | 1.00873500  | 0.88597000  | -1.33590000 |
| H  | 1.00851100  | -0.88640500 | -1.33612000 |
| C  | 2.85992800  | -0.00051800 | -0.67821900 |
| C  | 3.56836700  | -1.20840500 | -0.62993200 |
| C  | 3.56862400  | 1.20720300  | -0.62956500 |
| C  | 4.95494000  | -1.20899200 | -0.52056300 |
| H  | 3.03064500  | -2.15485400 | -0.71707800 |
| C  | 4.95519500  | 1.20746700  | -0.52019500 |
| H  | 3.03110000  | 2.15379200  | -0.71642200 |
| C  | 5.64781700  | -0.00084500 | -0.45865300 |
| H  | 5.49832700  | -2.15071100 | -0.50057500 |
| H  | 5.49878100  | 2.14906400  | -0.49992000 |
| H  | 6.73242500  | -0.00097200 | -0.37991100 |
| Cu | -1.35882000 | 0.00029300  | 0.06167500  |
| C  | -4.47374600 | 0.00129900  | -0.47138200 |
| N  | -3.31836200 | 0.00092300  | -0.34882800 |
| C  | -5.90467000 | 0.00155800  | -0.62851100 |
| H  | -6.34141000 | -0.86207000 | -0.11530300 |
| H  | -6.33216900 | 0.91470300  | -0.20031500 |

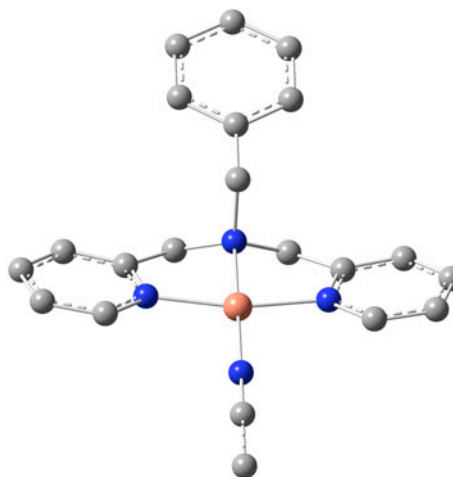

H -6.16863700 -0.04761200 -1.69063000

2) – [Cu<sup>II</sup>(bpa)(CH<sub>3</sub>CN)<sub>2</sub>]<sup>2+</sup>

Energy: -1362.07096036 a.u.

|    |             |             |             |
|----|-------------|-------------|-------------|
| C  | -1.52792500 | -2.94647400 | -0.90498000 |
| C  | -1.18817200 | -4.29052200 | -0.85294900 |
| C  | -0.06691300 | -4.66756600 | -0.11959300 |
| C  | 0.67576800  | -3.68832400 | 0.53477400  |
| C  | 0.27366900  | -2.36197800 | 0.44662200  |
| N  | -0.81735900 | -2.00231200 | -0.26853200 |
| H  | 0.23157600  | -5.71177200 | -0.06376000 |
| H  | -2.38917600 | -2.59655700 | -1.46923200 |
| H  | -1.78991300 | -5.02237600 | -1.38419700 |
| H  | 1.56218700  | -3.94695500 | 1.11049900  |
| C  | 0.97261400  | -1.23575100 | 1.15019600  |
| H  | 0.49927300  | -1.06452000 | 2.12687700  |
| H  | 2.03318700  | -1.45904600 | 1.33316500  |
| N  | 0.81515300  | 0.00004100  | 0.35866700  |
| C  | 0.97284900  | 1.23580200  | 1.15021100  |
| H  | 2.03346400  | 1.45891400  | 1.33315000  |
| H  | 0.49949500  | 1.06467400  | 2.12690200  |
| C  | 0.27407000  | 2.36214600  | 0.44666700  |
| C  | 0.67652000  | 3.68840000  | 0.53465600  |
| N  | -0.81720600 | 2.00271500  | -0.26823600 |
| C  | -0.06606800 | 4.66778600  | -0.11960100 |
| H  | 1.56312300  | 3.94684000  | 1.11017900  |
| C  | -1.52773100 | 2.94702300  | -0.90453200 |
| C  | -1.18761900 | 4.29098900  | -0.85263700 |
| H  | 0.23270800  | 5.71192000  | -0.06391500 |
| H  | -2.38924800 | 2.59733400  | -1.46850700 |
| H  | -1.78933800 | 5.02296300  | -1.38375000 |
| C  | 1.67537000  | -0.00003300 | -0.89088100 |
| H  | 1.37109300  | 0.88472100  | -1.46376300 |
| H  | 1.37086600  | -0.88466200 | -1.46383000 |
| C  | 3.14915600  | -0.00022000 | -0.62538300 |
| C  | 3.84942700  | -1.20695300 | -0.50456200 |
| C  | 3.84970200  | 1.20634400  | -0.50448400 |
| C  | 5.21800900  | -1.20800200 | -0.25440400 |
| H  | 3.32188600  | -2.15305900 | -0.64315900 |
| C  | 5.21828400  | 1.20706800  | -0.25432900 |
| H  | 3.32237900  | 2.15257900  | -0.64302300 |
| C  | 5.90153200  | -0.00054900 | -0.12319700 |
| H  | 5.75596800  | -2.15006800 | -0.17792900 |
| H  | 5.75645900  | 2.14900600  | -0.17779500 |
| H  | 6.97269300  | -0.00067700 | 0.06474300  |
| Cu | -1.15835700 | 0.00023600  | -0.23095700 |
| C  | -3.90340500 | 0.00012300  | -1.83264800 |
| N  | -2.90084000 | 0.00034100  | -1.24662100 |
| C  | -2.61457200 | -0.00033600 | 2.87691700  |
| N  | -1.99571200 | -0.00036500 | 1.89108200  |
| C  | -3.37866100 | -0.00012000 | 4.10199700  |
| H  | -4.11557000 | -0.80988100 | 4.09071600  |
| H  | -2.71848700 | -0.14289600 | 4.96384300  |
| H  | -3.90609900 | 0.95193800  | 4.22141500  |
| C  | -5.14643600 | -0.00006300 | -2.56204200 |
| H  | -5.70610100 | -0.91911100 | -2.35782900 |

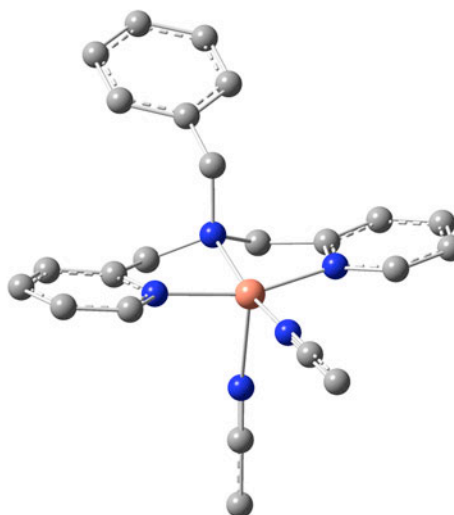

|   |             |            |             |
|---|-------------|------------|-------------|
| H | -5.76148600 | 0.85574900 | -2.26394400 |
| H | -4.95363800 | 0.06242500 | -3.63850700 |

3) – [Cu<sup>II</sup>(bpa)(CH<sub>3</sub>CN)(O<sub>2</sub>Cm)]<sup>+</sup>

3a (structure *i* in Figure 8)

Energy: -1729.49998905 a.u.

|    |             |             |             |
|----|-------------|-------------|-------------|
| C  | -1.01104800 | 3.28802300  | -1.24670200 |
| C  | -1.90923300 | 4.30272900  | -1.55229900 |
| C  | -3.21226600 | 4.20607300  | -1.07295100 |
| C  | -3.57473500 | 3.10311300  | -0.30447300 |
| C  | -2.61912500 | 2.13216800  | -0.02698700 |
| N  | -1.36138000 | 2.23429400  | -0.49830700 |
| H  | -3.94414900 | 4.97745700  | -1.30288000 |
| H  | 0.02121300  | 3.27866100  | -1.59603100 |
| H  | -1.59249600 | 5.14376800  | -2.16296900 |
| H  | -4.58783800 | 2.99173500  | 0.07836700  |
| C  | -2.88753800 | 0.92675000  | 0.83412000  |
| H  | -2.59616300 | 1.15783100  | 1.86760400  |
| H  | -3.95880000 | 0.67232600  | 0.84318200  |
| N  | -2.05228500 | -0.19582000 | 0.38968600  |
| C  | -1.79495800 | -1.19727300 | 1.42823200  |
| H  | -2.64644900 | -1.88073900 | 1.57260900  |
| H  | -1.64612900 | -0.65526000 | 2.37162100  |
| C  | -0.54062700 | -1.96115500 | 1.09955400  |
| C  | -0.35450900 | -3.28322600 | 1.48707500  |
| N  | 0.41279200  | -1.28028800 | 0.42525400  |
| C  | 0.84694900  | -3.91920600 | 1.18742800  |
| H  | -1.14919000 | -3.80332200 | 2.01939700  |
| C  | 1.56217900  | -1.90292300 | 0.11946600  |
| C  | 1.82239200  | -3.21611700 | 0.48961900  |
| H  | 1.01089600  | -4.95266200 | 1.48556300  |
| H  | 2.27869800  | -1.30733500 | -0.44294400 |
| H  | 2.77382900  | -3.66730400 | 0.21937300  |
| C  | -2.54163800 | -0.80338500 | -0.89077400 |
| H  | -1.76961400 | -1.51743200 | -1.20596900 |
| H  | -2.54947400 | 0.00760500  | -1.63099700 |
| C  | -3.88525500 | -1.46690900 | -0.80671300 |
| C  | -5.05563800 | -0.74267500 | -1.06079200 |
| C  | -3.99311200 | -2.81913400 | -0.46247000 |
| C  | -6.30393400 | -1.34943600 | -0.95735400 |
| H  | -4.98198500 | 0.30276900  | -1.36751700 |
| C  | -5.23976500 | -3.42890100 | -0.35735000 |
| H  | -3.08538700 | -3.40415700 | -0.30041200 |
| C  | -6.39715100 | -2.69257600 | -0.60005400 |
| H  | -7.20520100 | -0.77720200 | -1.16781300 |
| H  | -5.30841300 | -4.48352300 | -0.09839300 |
| H  | -7.37199000 | -3.16976500 | -0.52515800 |
| Cu | -0.13110700 | 0.65587200  | -0.03812600 |
| C  | 0.58630500  | 1.88013500  | 3.11528300  |
| N  | -0.10665300 | 1.32530900  | 2.36004200  |
| C  | 1.45433200  | 2.56683100  | 4.04575500  |
| H  | 1.78696100  | 3.51998100  | 3.62155200  |
| H  | 0.93039400  | 2.76698400  | 4.98593700  |
| H  | 2.33731400  | 1.95554300  | 4.26011100  |

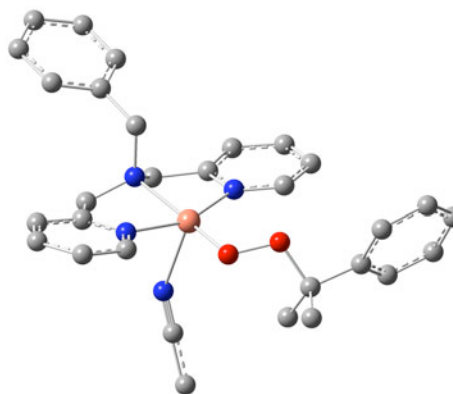



|   |            |             |             |
|---|------------|-------------|-------------|
| O | 1.34149800 | 1.60085400  | -0.74757800 |
| O | 2.41217100 | 0.73060300  | -1.07971100 |
| C | 3.62805300 | 1.07842900  | -0.32958300 |
| C | 3.30777700 | 1.21161100  | 1.14876700  |
| H | 2.84857300 | 0.29780300  | 1.54975500  |
| H | 4.21589000 | 1.42850200  | 1.72302600  |
| H | 2.60491300 | 2.03834300  | 1.28239200  |
| C | 4.16427500 | 2.39457400  | -0.87786200 |
| H | 5.08690400 | 2.68461000  | -0.36198700 |
| H | 4.38319700 | 2.31534800  | -1.94742100 |
| H | 3.41844200 | 3.18464700  | -0.73490900 |
| C | 4.53321600 | -0.09410000 | -0.66424600 |
| C | 5.14473600 | -0.87922400 | 0.31737700  |
| C | 4.72836800 | -0.43414200 | -2.00972500 |
| C | 5.93886100 | -1.96912800 | -0.03505600 |
| H | 5.01018100 | -0.64232100 | 1.37139700  |
| C | 5.50957700 | -1.52904500 | -2.36209700 |
| H | 4.24478600 | 0.15891700  | -2.78422900 |
| C | 6.12042400 | -2.29988400 | -1.37461500 |
| H | 6.41849600 | -2.55992000 | 0.74359300  |
| H | 5.64616900 | -1.77919200 | -3.41253400 |
| H | 6.74037800 | -3.15108600 | -1.64952800 |

### 3b

Energy: -1729.50013576 a.u.

|   |             |             |             |
|---|-------------|-------------|-------------|
| C | 0.94054800  | 3.53998900  | 0.14988500  |
| C | 1.81482300  | 4.61441500  | 0.25425200  |
| C | 3.13504400  | 4.44185400  | -0.15017300 |
| C | 3.53807200  | 3.20618500  | -0.65048600 |
| C | 2.60527100  | 2.18030000  | -0.73884600 |
| N | 1.33095500  | 2.35641200  | -0.33991700 |
| H | 3.84805100  | 5.25967400  | -0.07189200 |
| H | -0.10549400 | 3.58800700  | 0.45114300  |
| H | 1.46537100  | 5.56310700  | 0.65211800  |
| H | 4.56372500  | 3.03641400  | -0.97339500 |
| C | 2.90520200  | 0.82712200  | -1.32450000 |
| H | 2.60032000  | 0.82508800  | -2.38071600 |
| H | 3.98400400  | 0.60977700  | -1.30650400 |
| N | 2.11784800  | -0.20501900 | -0.63317700 |
| C | 1.84557100  | -1.38793800 | -1.46011600 |
| H | 2.70706100  | -2.07177000 | -1.51143500 |
| H | 1.65603000  | -1.03826900 | -2.48519400 |
| C | 0.61993000  | -2.09471900 | -0.94981000 |
| C | 0.47892100  | -3.47693600 | -0.98767100 |
| N | -0.35948700 | -1.29494800 | -0.47714700 |
| C | -0.70678800 | -4.05133500 | -0.53811400 |
| H | 1.29248000  | -4.09078600 | -1.37017900 |
| C | -1.49277100 | -1.85199100 | -0.02456600 |
| C | -1.71111400 | -3.22353300 | -0.04845500 |
| H | -0.83874600 | -5.13088100 | -0.56370000 |
| H | -2.24019000 | -1.15141300 | 0.34680000  |
| H | -2.65445000 | -3.62238600 | 0.31568800  |
| C | 2.69254100  | -0.55952100 | 0.70798600  |
| H | 1.95820100  | -1.21691400 | 1.18913100  |
| H | 2.69691700  | 0.36989800  | 1.29089400  |
| C | 4.05298600  | -1.19038700 | 0.66752100  |

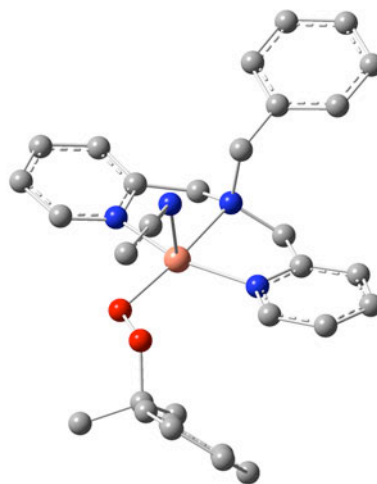

|    |             |             |             |
|----|-------------|-------------|-------------|
| C  | 5.20788600  | -0.40151600 | 0.72746200  |
| C  | 4.19492200  | -2.57942200 | 0.56741500  |
| C  | 6.47130800  | -0.98222600 | 0.66955100  |
| H  | 5.11078200  | 0.67934100  | 0.84883800  |
| C  | 5.45658300  | -3.16411200 | 0.50900700  |
| H  | 3.30251200  | -3.20878100 | 0.56461600  |
| C  | 6.59661900  | -2.36479200 | 0.55426600  |
| H  | 7.35994300  | -0.35693800 | 0.72749500  |
| H  | 5.55143400  | -4.24601100 | 0.44140300  |
| H  | 7.58352500  | -2.82096500 | 0.51531400  |
| Cu | 0.17657600  | 0.68342000  | -0.29641700 |
| C  | -1.00587300 | 0.65344600  | 2.63880700  |
| N  | 0.01863200  | 0.44766800  | 2.12096000  |
| C  | -2.28586600 | 0.92084600  | 3.25287300  |
| H  | -2.21077100 | 0.88977000  | 4.34454600  |
| H  | -2.63797800 | 1.91027300  | 2.94258700  |
| H  | -3.02329500 | 0.18197800  | 2.91889600  |
| O  | -1.38403800 | 1.77560700  | -0.27091000 |
| O  | -2.52120200 | 1.02895900  | 0.13420000  |
| C  | -3.53270200 | 0.99049000  | -0.94014300 |
| C  | -2.90842300 | 0.50839700  | -2.23723400 |
| H  | -2.46334200 | -0.48823800 | -2.13590700 |
| H  | -3.66099500 | 0.46732300  | -3.03233800 |
| H  | -2.12570900 | 1.20642700  | -2.54602800 |
| C  | -4.09004800 | 2.39678800  | -1.11534200 |
| H  | -4.87023400 | 2.41156000  | -1.88458200 |
| H  | -4.52486500 | 2.77367700  | -0.18380700 |
| H  | -3.28502400 | 3.07405300  | -1.41985300 |
| C  | -4.55046000 | 0.03291100  | -0.34525600 |
| C  | -4.91744000 | -1.16251100 | -0.96973300 |
| C  | -5.11284600 | 0.32868000  | 0.90407700  |
| C  | -5.82202400 | -2.03467700 | -0.36598700 |
| H  | -4.50548200 | -1.41926200 | -1.94405900 |
| C  | -6.00661400 | -0.54480300 | 1.51426900  |
| H  | -4.84350400 | 1.26049500  | 1.40044600  |
| C  | -6.36490600 | -1.73271800 | 0.87909900  |
| H  | -6.10689100 | -2.95269500 | -0.87722200 |
| H  | -6.43552500 | -0.29260100 | 2.48268800  |
| H  | -7.07241100 | -2.41317300 | 1.34870900  |

3c

Energy: -1729.49282065 a.u.

|   |             |            |             |
|---|-------------|------------|-------------|
| C | -0.05486100 | 3.27751000 | -0.75459200 |
| C | -0.63394100 | 4.35456700 | -1.41169000 |
| C | -2.02118700 | 4.40757300 | -1.51024000 |
| C | -2.78381900 | 3.38938100 | -0.94477000 |
| C | -2.13825000 | 2.34707100 | -0.29044100 |
| N | -0.79240000 | 2.29958000 | -0.21156600 |
| H | -2.50684500 | 5.23311600 | -2.02592800 |
| H | 1.02081900  | 3.16107600 | -0.63664800 |
| H | -0.00608800 | 5.13053300 | -1.84062700 |
| H | -3.87066400 | 3.40133900 | -1.00282500 |
| C | -2.86533900 | 1.23994000 | 0.42287400  |
| H | -2.99816600 | 1.53334700 | 1.47287800  |
| H | -3.86439500 | 1.07021800 | -0.00586200 |
| N | -2.04483600 | 0.01863600 | 0.41558600  |

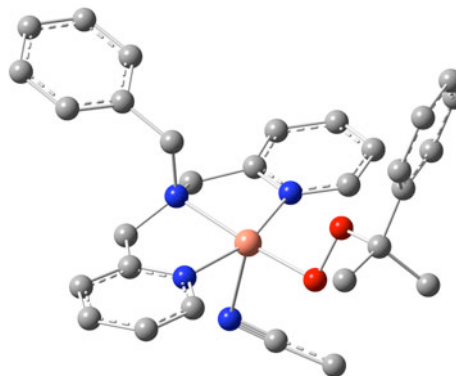

|    |             |             |             |
|----|-------------|-------------|-------------|
| C  | -2.35517000 | -0.91209300 | 1.51097500  |
| H  | -3.24049800 | -1.52734400 | 1.29063100  |
| H  | -2.58851800 | -0.30489800 | 2.39608800  |
| C  | -1.15276600 | -1.76266100 | 1.82204900  |
| C  | -1.24426100 | -3.03532600 | 2.37454000  |
| N  | 0.04160000  | -1.18390300 | 1.58933200  |
| C  | -0.07376600 | -3.70904200 | 2.71130300  |
| H  | -2.22127200 | -3.48519100 | 2.54203800  |
| C  | 1.17139500  | -1.82577900 | 1.91977000  |
| C  | 1.15429900  | -3.09330400 | 2.48701800  |
| H  | -0.12122400 | -4.70635000 | 3.14332100  |
| H  | 2.08801700  | -1.28397000 | 1.69338100  |
| H  | 2.08841500  | -3.58857900 | 2.73843600  |
| C  | -2.02375900 | -0.65855700 | -0.92647800 |
| H  | -1.27375100 | -1.45709400 | -0.85332800 |
| H  | -1.63400500 | 0.08278600  | -1.63644800 |
| C  | -3.34613400 | -1.19828300 | -1.38547200 |
| C  | -4.22057000 | -0.39961900 | -2.13148500 |
| C  | -3.73114700 | -2.50706200 | -1.07253700 |
| C  | -5.45720800 | -0.88972900 | -2.54010000 |
| H  | -3.91434400 | 0.60937600  | -2.41534100 |
| C  | -4.96722400 | -3.00019000 | -1.47971000 |
| H  | -3.04088900 | -3.15286100 | -0.52594100 |
| C  | -5.83366500 | -2.18965700 | -2.20968600 |
| H  | -6.12321000 | -0.26156800 | -3.12804200 |
| H  | -5.25002000 | -4.02277200 | -1.23851600 |
| H  | -6.79725100 | -2.57656100 | -2.53418600 |
| Cu | -0.07861300 | 0.67638800  | 0.74062200  |
| C  | 0.17402000  | 1.63538500  | 3.52087800  |
| N  | -0.87427400 | 1.56208600  | 3.01191000  |
| C  | 1.50122400  | 1.68962200  | 4.08937300  |
| H  | 1.76845500  | 2.71774100  | 4.35321600  |
| H  | 1.56491000  | 1.06797300  | 4.98813000  |
| H  | 2.20419500  | 1.32079100  | 3.33053900  |
| O  | 1.74294900  | 1.16363200  | 0.95122900  |
| O  | 2.32537600  | 0.20650000  | -0.00415600 |
| C  | 3.61163500  | 0.70222000  | -0.46578800 |
| C  | 3.44332000  | 2.04337800  | -1.15921200 |
| H  | 3.07848900  | 2.77672600  | -0.43369200 |
| H  | 4.39871300  | 2.40987400  | -1.55035000 |
| H  | 2.73064700  | 1.97489800  | -1.99006700 |
| C  | 4.54879000  | 0.84425500  | 0.73157500  |
| H  | 4.62932700  | -0.10051000 | 1.28188100  |
| H  | 5.55479100  | 1.12895600  | 0.40373800  |
| H  | 4.17451500  | 1.61516300  | 1.41432900  |
| C  | 4.06812900  | -0.41838500 | -1.38674000 |
| C  | 4.13260600  | -1.72682400 | -0.89035400 |
| C  | 4.44113000  | -0.19431300 | -2.71387400 |
| C  | 4.55777200  | -2.77820000 | -1.69360200 |
| H  | 3.84198700  | -1.92021800 | 0.14195300  |
| C  | 4.87688500  | -1.24481800 | -3.51898500 |
| H  | 4.40262900  | 0.80941000  | -3.13193700 |
| C  | 4.93503600  | -2.53930500 | -3.01352700 |
| H  | 4.60147500  | -3.78746000 | -1.28771800 |
| H  | 5.17170400  | -1.04661700 | -4.54779400 |
| H  | 5.27552000  | -3.35896800 | -3.64319900 |

Energy: -1729.50175755 a.u.

|    |             |             |             |
|----|-------------|-------------|-------------|
| C  | -0.69042800 | -2.45924800 | -1.27012400 |
| C  | -0.64683600 | -3.84761700 | -1.29445900 |
| C  | 0.31813100  | -4.49798900 | -0.53044600 |
| C  | 1.20414800  | -3.74379800 | 0.23417900  |
| C  | 1.09432900  | -2.35756700 | 0.22107800  |
| N  | 0.15987400  | -1.73817300 | -0.52688400 |
| H  | 0.38685900  | -5.58375200 | -0.53551000 |
| H  | -1.40921200 | -1.87615900 | -1.84407800 |
| H  | -1.34921200 | -4.40380500 | -1.90938700 |
| H  | 1.97499800  | -4.22161500 | 0.83661900  |
| C  | 1.96423800  | -1.45467200 | 1.06010900  |
| H  | 1.46755300  | -1.27876900 | 2.02333800  |
| H  | 2.93582300  | -1.92610500 | 1.27486500  |
| N  | 2.11255600  | -0.15241900 | 0.40018800  |
| C  | 2.38688100  | 0.97127500  | 1.30519000  |
| H  | 3.43923500  | 1.00631100  | 1.62698800  |
| H  | 1.76822800  | 0.82382800  | 2.20082300  |
| C  | 1.97911600  | 2.26130100  | 0.64087700  |
| C  | 2.60984400  | 3.47667300  | 0.88076300  |
| N  | 0.92816800  | 2.17567000  | -0.20111700 |
| C  | 2.13983900  | 4.62127500  | 0.24277100  |
| H  | 3.45923900  | 3.52013100  | 1.56018700  |
| C  | 0.48091400  | 3.27369900  | -0.82632600 |
| C  | 1.05955500  | 4.52005500  | -0.62910800 |
| H  | 2.61954900  | 5.58174400  | 0.41790700  |
| H  | -0.36326500 | 3.11335000  | -1.49655800 |
| H  | 0.67252400  | 5.38875100  | -1.15435300 |
| C  | 3.05861700  | -0.20788500 | -0.76160800 |
| H  | 2.96687700  | 0.75533900  | -1.28041400 |
| H  | 2.66454600  | -0.97611700 | -1.44004400 |
| C  | 4.48859800  | -0.48854400 | -0.40264800 |
| C  | 4.96796300  | -1.80241700 | -0.35081100 |
| C  | 5.36684600  | 0.55981300  | -0.10512400 |
| C  | 6.28759400  | -2.06398700 | 0.00593000  |
| H  | 4.30337600  | -2.62620500 | -0.61929800 |
| C  | 6.68684900  | 0.30189500  | 0.25212100  |
| H  | 5.01478300  | 1.59076800  | -0.18078300 |
| C  | 7.14706700  | -1.01158600 | 0.31276100  |
| H  | 6.64993500  | -3.08961800 | 0.03221000  |
| H  | 7.36151900  | 1.12698900  | 0.47108400  |
| H  | 8.18062100  | -1.21434800 | 0.58518500  |
| Cu | 0.18720700  | 0.31123100  | -0.39813300 |
| C  | -1.65932500 | -0.55278600 | 2.01413600  |
| N  | -0.66020900 | 0.03526300  | 1.87636000  |
| C  | -2.88506700 | -1.29999200 | 2.17017500  |
| H  | -3.20307500 | -1.69019200 | 1.19530500  |
| H  | -2.74336100 | -2.12933800 | 2.87095900  |
| H  | -3.68938900 | -0.65393000 | 2.54023700  |
| O  | -1.31528700 | 0.68832400  | -1.48777700 |
| O  | -2.47587200 | 0.12340200  | -0.86197500 |
| C  | -3.50208300 | 1.15626900  | -0.70029000 |
| C  | -3.00583800 | 2.23433100  | 0.24923800  |
| H  | -2.05220400 | 2.62336100  | -0.11988400 |
| H  | -3.71111400 | 3.07110800  | 0.30419900  |
| H  | -2.84564200 | 1.84973400  | 1.26307000  |
| C  | -3.83220400 | 1.74543700  | -2.06727000 |
| H  | -4.12425900 | 0.95692200  | -2.76901300 |
| H  | -4.66274500 | 2.45552800  | -1.98575200 |

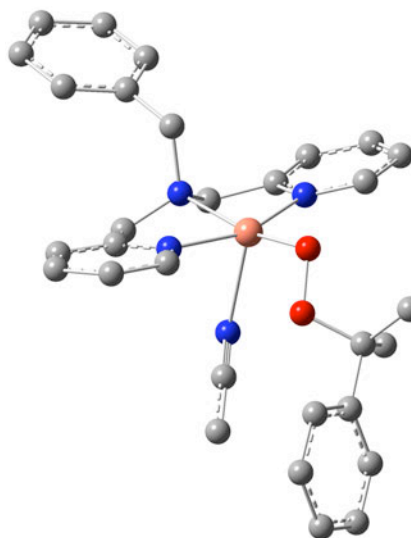

|   |             |             |             |
|---|-------------|-------------|-------------|
| H | -2.96008900 | 2.26543000  | -2.47708700 |
| C | -4.67575500 | 0.35960500  | -0.15868400 |
| C | -5.00973700 | -0.86293100 | -0.75669500 |
| C | -5.44258500 | 0.80449100  | 0.92168300  |
| C | -6.06276300 | -1.63089200 | -0.26985000 |
| H | -4.42429200 | -1.21482100 | -1.60496900 |
| C | -6.50621800 | 0.04201600  | 1.40245400  |
| H | -5.21599700 | 1.75744500  | 1.39717100  |
| C | -6.81347100 | -1.18204700 | 0.81543800  |
| H | -6.30490700 | -2.58019200 | -0.74470900 |
| H | -7.09697000 | 0.40950200  | 2.23968800  |
| H | -7.64168200 | -1.77823300 | 1.19330400  |

#### 4) – [Cu<sup>II</sup>(bpa)(O<sub>2</sub>Cm)]<sup>+</sup>

##### 4a (structure *ii* in Figure 8)

Energy: -1596.74023326 a.u.

|   |             |             |             |
|---|-------------|-------------|-------------|
| C | -1.56188600 | -2.19384600 | -0.55155500 |
| C | -1.68993800 | -3.57365500 | -0.44945800 |
| C | -0.68892500 | -4.29320600 | 0.19439100  |
| C | 0.40398400  | -3.61402400 | 0.73014600  |
| C | 0.46236400  | -2.23237500 | 0.60591700  |
| N | -0.50461400 | -1.54683200 | -0.03863600 |
| H | -0.75544700 | -5.37552200 | 0.28210700  |
| H | -2.30583300 | -1.56007600 | -1.03664400 |
| H | -2.56265900 | -4.06477900 | -0.87112600 |
| H | 1.20041000  | -4.14733200 | 1.24624500  |
| C | 1.54568700  | -1.39146100 | 1.23524500  |
| H | 1.21505500  | -1.08664600 | 2.23876200  |
| H | 2.47322700  | -1.96826100 | 1.37189700  |
| N | 1.76213900  | -0.16783100 | 0.45119800  |
| C | 2.26971300  | 0.97440900  | 1.22220000  |
| H | 3.35835100  | 0.92497900  | 1.37830400  |
| H | 1.80503400  | 0.93315700  | 2.21808200  |
| C | 1.87223700  | 2.26673100  | 0.55427800  |
| C | 2.64506800  | 3.41931600  | 0.61573800  |
| N | 0.67804300  | 2.25550000  | -0.07603900 |
| C | 2.16751500  | 4.58607200  | 0.02386700  |
| H | 3.60691900  | 3.39939100  | 1.12507300  |
| C | 0.21536300  | 3.37733100  | -0.64964400 |
| C | 0.93244600  | 4.56638100  | -0.61631600 |
| H | 2.75737300  | 5.49932900  | 0.05936200  |
| H | -0.75956500 | 3.28740300  | -1.12604600 |
| H | 0.52746200  | 5.45556300  | -1.09134500 |
| C | 2.55641400  | -0.42087200 | -0.79875500 |
| H | 2.51175900  | 0.50817000  | -1.38308100 |
| H | 2.00146000  | -1.18299600 | -1.36219600 |
| C | 3.97752200  | -0.84513100 | -0.57327500 |
| C | 4.30858800  | -2.19993600 | -0.45453100 |
| C | 4.99691400  | 0.10874200  | -0.47145000 |
| C | 5.62349200  | -2.59148200 | -0.22045000 |
| H | 3.52949900  | -2.95530100 | -0.57589600 |
| C | 6.31250700  | -0.27976100 | -0.23731200 |
| H | 4.75734400  | 1.16561200  | -0.60620200 |
| C | 6.62572600  | -1.63079700 | -0.10596000 |

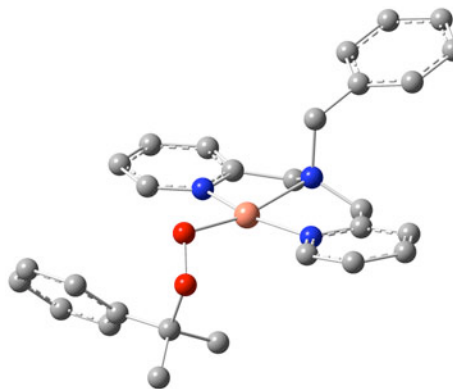

|    |             |             |             |
|----|-------------|-------------|-------------|
| H  | 5.86919600  | -3.64836700 | -0.14103100 |
| H  | 7.09704800  | 0.47113700  | -0.17126900 |
| H  | 7.65492100  | -1.93628000 | 0.06969500  |
| Cu | -0.16337600 | 0.43494300  | -0.24296600 |
| O  | -1.77251200 | 0.73609600  | -1.16321700 |
| O  | -2.51897200 | 1.86181800  | -0.74303600 |
| C  | -3.33612900 | 1.52093700  | 0.42246400  |
| C  | -4.30916100 | 2.69077500  | 0.49604200  |
| H  | -4.92114100 | 2.74258600  | -0.40988700 |
| H  | -4.97788200 | 2.57244000  | 1.35495100  |
| H  | -3.76925100 | 3.63886000  | 0.60673000  |
| C  | -2.43749200 | 1.49605100  | 1.65260200  |
| H  | -3.02052900 | 1.41641400  | 2.57675600  |
| H  | -1.74358200 | 0.64112400  | 1.63203300  |
| H  | -1.85608900 | 2.42399600  | 1.70494300  |
| C  | -4.06083200 | 0.21138500  | 0.16765700  |
| C  | -4.21143400 | -0.76311300 | 1.15581400  |
| C  | -4.60246600 | -0.03094900 | -1.10065100 |
| C  | -4.88650300 | -1.95442300 | 0.88614000  |
| H  | -3.80349300 | -0.60352100 | 2.15292400  |
| C  | -5.26628100 | -1.22075200 | -1.37496400 |
| H  | -4.46932600 | 0.71454000  | -1.88299200 |
| C  | -5.41162000 | -2.18895200 | -0.38020700 |
| H  | -5.00063100 | -2.69835900 | 1.67293200  |
| H  | -5.67540000 | -1.39355700 | -2.36876900 |
| H  | -5.94067400 | -3.11661700 | -0.59178500 |

#### 4b

Energy: -1596.73797663 a.u.

|   |             |             |             |
|---|-------------|-------------|-------------|
| C | -1.56188600 | -2.19384600 | -0.55155500 |
| C | -1.68993800 | -3.57365500 | -0.44945800 |
| C | -0.68892500 | -4.29320600 | 0.19439100  |
| C | 0.40398400  | -3.61402400 | 0.73014600  |
| C | 0.46236400  | -2.23237500 | 0.60591700  |
| N | -0.50461400 | -1.54683200 | -0.03863600 |
| H | -0.75544700 | -5.37552200 | 0.28210700  |
| H | -2.30583300 | -1.56007600 | -1.03664400 |
| H | -2.56265900 | -4.06477900 | -0.87112600 |
| H | 1.20041000  | -4.14733200 | 1.24624500  |
| C | 1.54568700  | -1.39146100 | 1.23524500  |
| H | 1.21505500  | -1.08664600 | 2.23876200  |
| H | 2.47322700  | -1.96826100 | 1.37189700  |
| N | 1.76213900  | -0.16783100 | 0.45119800  |
| C | 2.26971300  | 0.97440900  | 1.22220000  |
| H | 3.35835100  | 0.92497900  | 1.37830400  |
| H | 1.80503400  | 0.93315700  | 2.21808200  |
| C | 1.87223700  | 2.26673100  | 0.55427800  |
| C | 2.64506800  | 3.41931600  | 0.61573800  |
| N | 0.67804300  | 2.25550000  | -0.07603900 |
| C | 2.16751500  | 4.58607200  | 0.02386700  |
| H | 3.60691900  | 3.39939100  | 1.12507300  |
| C | 0.21536300  | 3.37733100  | -0.64964400 |
| C | 0.93244600  | 4.56638100  | -0.61631600 |
| H | 2.75737300  | 5.49932900  | 0.05936200  |
| H | -0.75956500 | 3.28740300  | -1.12604600 |
| H | 0.52746200  | 5.45556300  | -1.09134500 |

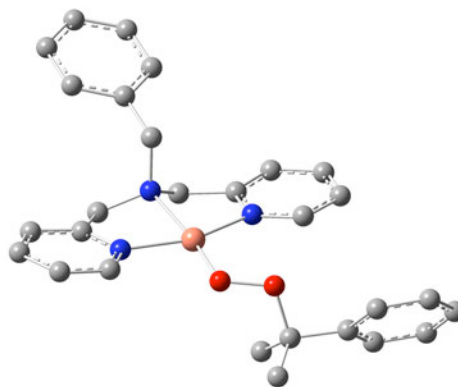

|    |             |             |             |
|----|-------------|-------------|-------------|
| C  | 2.55641400  | -0.42087200 | -0.79875500 |
| H  | 2.51175900  | 0.50817000  | -1.38308100 |
| H  | 2.00146000  | -1.18299600 | -1.36219600 |
| C  | 3.97752200  | -0.84513100 | -0.57327500 |
| C  | 4.30858800  | -2.19993600 | -0.45453100 |
| C  | 4.99691400  | 0.10874200  | -0.47145000 |
| C  | 5.62349200  | -2.59148200 | -0.22045000 |
| H  | 3.52949900  | -2.95530100 | -0.57589600 |
| C  | 6.31250700  | -0.27976100 | -0.23731200 |
| H  | 4.75734400  | 1.16561200  | -0.60620200 |
| C  | 6.62572600  | -1.63079700 | -0.10596000 |
| H  | 5.86919600  | -3.64836700 | -0.14103100 |
| H  | 7.09704800  | 0.47113700  | -0.17126900 |
| H  | 7.65492100  | -1.93628000 | 0.06969500  |
| Cu | -0.16337600 | 0.43494300  | -0.24296600 |
| O  | -1.77251200 | 0.73609600  | -1.16321700 |
| O  | -2.51897200 | 1.86181800  | -0.74303600 |
| C  | -3.33612900 | 1.52093700  | 0.42246400  |
| C  | -4.30916100 | 2.69077500  | 0.49604200  |
| H  | -4.92114100 | 2.74258600  | -0.40988700 |
| H  | -4.97788200 | 2.57244000  | 1.35495100  |
| H  | -3.76925100 | 3.63886000  | 0.60673000  |
| C  | -2.43749200 | 1.49605100  | 1.65260200  |
| H  | -3.02052900 | 1.41641400  | 2.57675600  |
| H  | -1.74358200 | 0.64112400  | 1.63203300  |
| H  | -1.85608900 | 2.42399600  | 1.70494300  |
| C  | -4.06083200 | 0.21138500  | 0.16765700  |
| C  | -4.21143400 | -0.76311300 | 1.15581400  |
| C  | -4.60246600 | -0.03094900 | -1.10065100 |
| C  | -4.88650300 | -1.95442300 | 0.88614000  |
| H  | -3.80349300 | -0.60352100 | 2.15292400  |
| C  | -5.26628100 | -1.22075200 | -1.37496400 |
| H  | -4.46932600 | 0.71454000  | -1.88299200 |
| C  | -5.41162000 | -2.18895200 | -0.38020700 |
| H  | -5.00063100 | -2.69835900 | 1.67293200  |
| H  | -5.67540000 | -1.39355700 | -2.36876900 |
| H  | -5.94067400 | -3.11661700 | -0.59178500 |

4c

Energy: -1596.75394445 a.u.

|   |             |             |             |
|---|-------------|-------------|-------------|
| C | -2.08450800 | 2.10558300  | 0.09453400  |
| C | -3.19448000 | 2.71383500  | 0.66428000  |
| C | -3.78596100 | 2.11973000  | 1.77524700  |
| C | -3.25942600 | 0.93106300  | 2.26867500  |
| C | -2.14896400 | 0.37414800  | 1.64398200  |
| N | -1.56817100 | 0.96768900  | 0.58484000  |
| H | -4.65638900 | 2.57077700  | 2.24675400  |
| H | -1.56713100 | 2.51597600  | -0.76993700 |
| H | -3.58503500 | 3.63437100  | 0.23948700  |
| H | -3.70807000 | 0.43009400  | 3.12487100  |
| C | -1.50157100 | -0.89570600 | 2.14449800  |
| H | -0.78234800 | -0.63340800 | 2.93383500  |
| H | -2.25493300 | -1.54978200 | 2.61457600  |
| N | -0.76156900 | -1.59933200 | 1.08579100  |
| C | 0.43685900  | -2.31324800 | 1.55248400  |
| H | 0.19096200  | -3.30386500 | 1.96845700  |
| H | 0.89057400  | -1.72431900 | 2.36178100  |
| C | 1.44028300  | -2.43533100 | 0.43214900  |

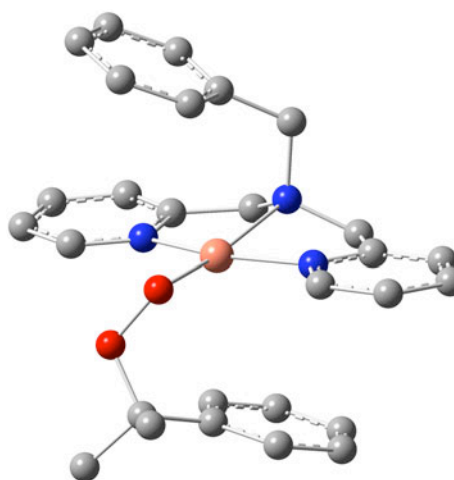



|    |             |             |             |
|----|-------------|-------------|-------------|
| C  | 2.40667000  | -3.43446100 | 0.38701200  |
| N  | 1.37752900  | -1.48206600 | -0.51635000 |
| C  | 3.32328700  | -3.44001900 | -0.66019700 |
| H  | 2.43467100  | -4.19837700 | 1.16173400  |
| C  | 2.26169500  | -1.48129500 | -1.52381300 |
| C  | 3.25085400  | -2.44809300 | -1.63462500 |
| H  | 4.08400900  | -4.21558600 | -0.71676000 |
| H  | 2.14335700  | -0.66412200 | -2.23553100 |
| H  | 3.94573600  | -2.42330300 | -2.46960300 |
| C  | -1.62937300 | -2.52468900 | 0.29075700  |
| H  | -2.16565400 | -3.18828100 | 0.98981000  |
| H  | -0.94546900 | -3.15104500 | -0.29655900 |
| C  | -2.57530400 | -1.80064200 | -0.62011500 |
| C  | -3.88800500 | -1.52629300 | -0.23280800 |
| C  | -4.72422700 | -0.77458900 | -1.05509300 |
| H  | -4.25849700 | -1.90463600 | 0.72171200  |
| C  | -2.94808200 | -0.57111100 | -2.67730500 |
| C  | -4.25240600 | -0.29039800 | -2.27358400 |
| H  | -5.74725400 | -0.56979700 | -0.74548300 |
| H  | -2.57709100 | -0.20569500 | -3.63241500 |
| H  | -4.90642100 | 0.29588300  | -2.91586400 |
| Cu | -0.03086800 | -0.06165200 | -0.23461100 |
| O  | 0.51746900  | 1.05578900  | -1.66862600 |
| O  | 0.66564700  | 2.39722700  | -1.21708500 |
| C  | 2.06133900  | 2.65759600  | -0.88918900 |
| C  | 2.02922000  | 4.10816200  | -0.42315900 |
| H  | 3.03374300  | 4.43574100  | -0.13597000 |
| H  | 1.67071400  | 4.75721100  | -1.22929800 |
| H  | 1.36996500  | 4.23572700  | 0.44251300  |
| C  | 2.47010500  | 1.72796200  | 0.24488800  |
| C  | 3.62927500  | 0.95143500  | 0.21579300  |
| C  | 1.64004700  | 1.63822100  | 1.37295100  |
| C  | 3.95163600  | 0.10362900  | 1.27647100  |
| H  | 4.29586100  | 1.00185100  | -0.64365100 |
| C  | 1.96112200  | 0.79836900  | 2.43664100  |
| H  | 0.74127500  | 2.25414200  | 1.41677300  |
| C  | 3.12027800  | 0.02195400  | 2.38938700  |
| H  | 4.86474300  | -0.48830500 | 1.23405700  |
| H  | 1.32164900  | 0.77462900  | 3.32002600  |
| H  | 3.38405300  | -0.62481400 | 3.22520000  |
| C  | 2.90343300  | 2.51460300  | -2.14467200 |
| H  | 2.49369500  | 3.15559400  | -2.93108500 |
| H  | 3.94081200  | 2.81805700  | -1.96434900 |
| H  | 2.89737200  | 1.48374700  | -2.51200700 |
| C  | -2.11879900 | -1.32923700 | -1.85686900 |
| H  | -1.10313700 | -1.56578700 | -2.18355300 |

4d

Energy: -1596.74171808 a.u.

|   |             |             |             |
|---|-------------|-------------|-------------|
| C | -1.67891100 | -2.11462000 | -1.40309900 |
| C | -2.83474800 | -2.85708400 | -1.59736200 |
| C | -4.05392600 | -2.18987300 | -1.66607900 |
| C | -4.07588200 | -0.80378500 | -1.55214300 |
| C | -2.88091700 | -0.12092700 | -1.36370100 |
| N | -1.70517800 | -0.77753000 | -1.28317000 |
| H | -4.98023600 | -2.74245100 | -1.80721900 |
| H | -0.68812800 | -2.56500400 | -1.34002400 |
| H | -2.77465700 | -3.93790600 | -1.68971600 |

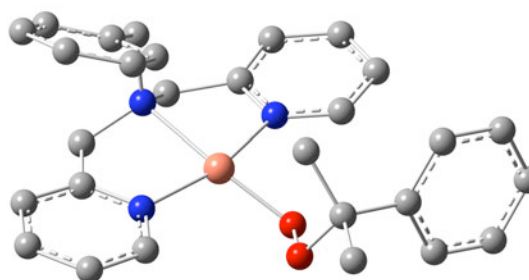



|    |             |             |             |
|----|-------------|-------------|-------------|
| H  | -5.01197200 | -0.25047500 | -1.59848700 |
| C  | -2.81136300 | 1.38644500  | -1.31552500 |
| H  | -2.61979700 | 1.75562900  | -2.33280800 |
| H  | -3.78108300 | 1.80646700  | -1.00588400 |
| N  | -1.71079900 | 1.85174600  | -0.45383500 |
| C  | -1.05030600 | 3.08544100  | -0.91905700 |
| H  | -1.61532800 | 3.98638400  | -0.62964300 |
| H  | -1.02447700 | 3.06274500  | -2.01770500 |
| C  | 0.36575500  | 3.14695100  | -0.40412200 |
| C  | 1.01219800  | 4.32771600  | -0.06505000 |
| N  | 1.00277000  | 1.96000300  | -0.35127400 |
| C  | 2.35007800  | 4.27516500  | 0.32232300  |
| H  | 0.47649500  | 5.27386700  | -0.10861400 |
| C  | 2.29224700  | 1.90297400  | 0.01447000  |
| C  | 3.00197600  | 3.04675400  | 0.35821300  |
| H  | 2.87552100  | 5.18809300  | 0.59399500  |
| H  | 2.73487000  | 0.90614800  | 0.00988000  |
| H  | 4.04545300  | 2.96401900  | 0.65023200  |
| C  | -2.14483700 | 2.03636300  | 0.96448000  |
| H  | -2.81048900 | 2.91573000  | 1.00618000  |
| H  | -1.23847100 | 2.28601700  | 1.53352200  |
| C  | -2.83284700 | 0.83569000  | 1.53602200  |
| C  | -4.22579500 | 0.79180400  | 1.63527900  |
| C  | -4.86509200 | -0.35034000 | 2.11115000  |
| H  | -4.81385500 | 1.66375900  | 1.34410200  |
| C  | -2.72300100 | -1.42151500 | 2.40894600  |
| C  | -4.11484400 | -1.46090300 | 2.49015300  |
| H  | -5.94993000 | -0.37057500 | 2.19271100  |
| H  | -2.13178300 | -2.27928200 | 2.72568000  |
| H  | -4.61281900 | -2.35259300 | 2.86540400  |
| Cu | -0.14703200 | 0.36349700  | -0.78344100 |
| O  | 1.41155900  | -0.60281700 | -1.23412800 |
| O  | 1.43820500  | -2.00527600 | -1.07298500 |
| C  | 2.03625600  | -2.33309000 | 0.21880700  |
| C  | 2.17887500  | -3.84722800 | 0.14475700  |
| H  | 2.64486600  | -4.22610300 | 1.06031300  |
| H  | 1.19961100  | -4.32901900 | 0.03111600  |
| H  | 2.80916700  | -4.13429500 | -0.70296900 |
| C  | 3.38952700  | -1.65039800 | 0.33659300  |
| C  | 3.87087200  | -1.17607800 | 1.55947900  |
| C  | 4.18468300  | -1.49203500 | -0.80436100 |
| C  | 5.11440000  | -0.54956500 | 1.64166100  |
| H  | 3.27736700  | -1.28938200 | 2.46575600  |
| C  | 5.42131200  | -0.86199100 | -0.72514600 |
| H  | 3.80887400  | -1.84201200 | -1.76390200 |
| C  | 5.89071800  | -0.38575500 | 0.49876400  |
| H  | 5.47453500  | -0.19211400 | 2.60484700  |
| H  | 6.02237900  | -0.74058300 | -1.62444400 |
| H  | 6.86125500  | 0.10309100  | 0.56066300  |
| C  | 1.06407600  | -1.92431500 | 1.31612500  |
| H  | 0.05993900  | -2.29922800 | 1.07863900  |
| H  | 1.34976400  | -2.33423900 | 2.29106800  |
| H  | 1.02358300  | -0.83038900 | 1.41270300  |
| C  | -2.08928400 | -0.27550800 | 1.94164500  |
| H  | -0.99967500 | -0.23425600 | 1.88990400  |

## 5) – Self – Decomposition Structures (Bpa)

### 5a (structure *iii* in Figure 8)

Energy: -1596.69181842 a.u.

|    |             |             |             |
|----|-------------|-------------|-------------|
| C  | 0.17641400  | 2.97542500  | -1.61467200 |
| C  | -0.19753100 | 4.30801400  | -1.50748800 |
| C  | -1.14596200 | 4.65953900  | -0.55122400 |
| C  | -1.68696400 | 3.67197700  | 0.26799000  |
| C  | -1.25952100 | 2.35934200  | 0.11072000  |
| N  | -0.34795100 | 2.02721400  | -0.82637100 |
| H  | -1.46337800 | 5.69428200  | -0.44352000 |
| H  | 0.92239300  | 2.63349400  | -2.33017000 |
| H  | 0.24738100  | 5.05120800  | -2.16313200 |
| H  | -2.42820000 | 3.91416600  | 1.02744200  |
| C  | -1.71016800 | 1.22610200  | 0.99758000  |
| H  | -1.01696700 | 1.14260400  | 1.84835100  |
| H  | -2.71246100 | 1.41044700  | 1.41353200  |
| N  | -1.64015900 | -0.03815000 | 0.25091400  |
| C  | -1.52779800 | -1.24169100 | 1.09132000  |
| H  | -2.49401400 | -1.53099100 | 1.53121300  |
| H  | -0.84941100 | -0.99808400 | 1.92216700  |
| C  | -0.92001200 | -2.36150200 | 0.28510200  |
| C  | -1.15688700 | -3.70781400 | 0.53333100  |
| N  | -0.06299400 | -1.96745900 | -0.67521900 |
| C  | -0.46970200 | -4.65876600 | -0.21770000 |
| H  | -1.86078100 | -4.00426900 | 1.30901800  |
| C  | 0.60939100  | -2.87575400 | -1.39049400 |
| C  | 0.43247000  | -4.23942600 | -1.19096900 |
| H  | -0.63655900 | -5.71904200 | -0.04108200 |
| H  | 1.30638000  | -2.46702400 | -2.12118100 |
| H  | 0.99051400  | -4.95419600 | -1.78936100 |
| C  | -2.73192600 | -0.15679900 | -0.77574800 |
| H  | -2.49015200 | -1.04410400 | -1.37407900 |
| H  | -2.62706700 | 0.71471200  | -1.43431300 |
| C  | -4.11883600 | -0.24543100 | -0.21139100 |
| C  | -4.87121000 | 0.91209200  | 0.01931000  |
| C  | -4.68199100 | -1.48843000 | 0.09990800  |
| C  | -6.14951400 | 0.83115500  | 0.56366600  |
| H  | -4.45826000 | 1.88449700  | -0.25731300 |
| C  | -5.95993500 | -1.57249200 | 0.64423800  |
| H  | -4.11941900 | -2.39996900 | -0.11221000 |
| C  | -6.69280100 | -0.41166100 | 0.88127300  |
| H  | -6.72818300 | 1.73769400  | 0.72811000  |
| H  | -6.39024300 | -2.54545600 | 0.87190900  |
| H  | -7.69464800 | -0.47659000 | 1.30020700  |
| Cu | 0.19549600  | 0.07221000  | -0.74237400 |
| O  | 1.85903800  | 0.10246000  | -1.47476700 |
| O  | 1.76476000  | -0.20343600 | 0.73369300  |
| C  | 2.80765400  | 0.58411400  | 1.18673700  |
| C  | 2.55645200  | 2.06653800  | 0.90908700  |
| H  | 1.58317800  | 2.37055000  | 1.31743000  |
| H  | 3.32684500  | 2.69981600  | 1.36107800  |
| H  | 2.56000600  | 2.22810300  | -0.17369900 |
| C  | 2.74807300  | 0.32641400  | 2.72489300  |
| H  | 2.88890100  | -0.73600100 | 2.94225000  |
| H  | 3.55365700  | 0.89434600  | 3.20256500  |
| H  | 1.78662200  | 0.66046100  | 3.13066700  |
| C  | 4.15972900  | 0.12042300  | 0.66591400  |
| C  | 5.32461600  | 0.81398200  | 1.01258500  |
| C  | 4.26592400  | -1.01605100 | -0.13847700 |
| C  | 6.56593400  | 0.39681900  | 0.54484100  |
| H  | 5.26720400  | 1.69222100  | 1.65689000  |

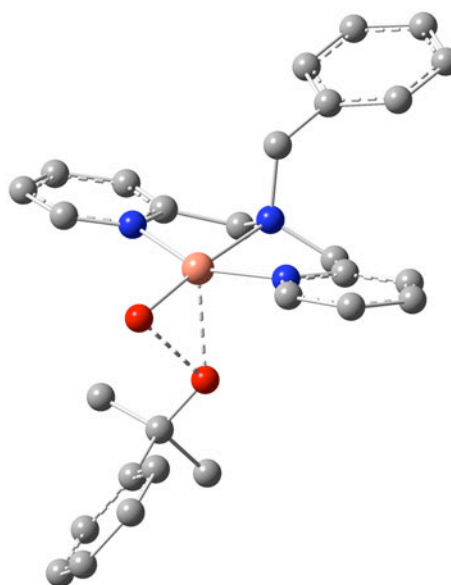

|   |            |             |             |
|---|------------|-------------|-------------|
| C | 5.50747700 | -1.43248200 | -0.60976100 |
| H | 3.36212800 | -1.55840200 | -0.40456200 |
| C | 6.66064800 | -0.72900900 | -0.27077200 |
| H | 7.46152100 | 0.95077000  | 0.81942600  |
| H | 5.57576300 | -2.31250100 | -1.24706700 |
| H | 7.63103700 | -1.05803400 | -0.63719500 |

### 5b

Energy: -1596.69531235 a.u.

|    |             |             |             |
|----|-------------|-------------|-------------|
| C  | 0.11300200  | 3.28784700  | -1.87075700 |
| C  | -0.18058900 | 4.57587800  | -1.44374800 |
| C  | -0.79441900 | 4.74407900  | -0.20592600 |
| C  | -1.08861800 | 3.62349600  | 0.56655800  |
| C  | -0.75646400 | 2.36478800  | 0.08061000  |
| N  | -0.17491700 | 2.21091400  | -1.12761500 |
| H  | -1.04223800 | 5.73931500  | 0.15632700  |
| H  | 0.60505400  | 3.08764000  | -2.82080900 |
| H  | 0.06715900  | 5.42619600  | -2.07285100 |
| H  | -1.56388100 | 3.72034000  | 1.54108100  |
| C  | -0.93415200 | 1.09510900  | 0.87310300  |
| H  | -0.00655300 | 0.89520700  | 1.43368900  |
| H  | -1.74824900 | 1.18631200  | 1.60841900  |
| N  | -1.13357500 | -0.03362300 | -0.04662100 |
| C  | -0.79310800 | -1.34924900 | 0.52033000  |
| H  | -1.58557500 | -1.73193600 | 1.18092900  |
| H  | 0.11287700  | -1.21717600 | 1.13122900  |
| C  | -0.47975600 | -2.31126100 | -0.59675800 |
| C  | -0.65437800 | -3.68638600 | -0.49948000 |
| N  | 0.05458900  | -1.74967900 | -1.69757500 |
| C  | -0.24295500 | -4.49144200 | -1.55909100 |
| H  | -1.09758300 | -4.11757100 | 0.39649200  |
| C  | 0.46894400  | -2.51959800 | -2.70940300 |
| C  | 0.33456500  | -3.90224200 | -2.67978900 |
| H  | -0.36933000 | -5.57064600 | -1.50692200 |
| H  | 0.93018200  | -1.98849400 | -3.54020900 |
| H  | 0.67617000  | -4.50034800 | -3.52002500 |
| C  | -2.48713400 | -0.01868700 | -0.69471900 |
| H  | -2.46443200 | -0.80300700 | -1.46169900 |
| H  | -2.56524100 | 0.94247800  | -1.21880800 |
| C  | -3.63789100 | -0.21457400 | 0.24767500  |
| C  | -4.24712400 | 0.88325800  | 0.86609900  |
| C  | -4.11697800 | -1.49870400 | 0.53090900  |
| C  | -5.29953600 | 0.70217600  | 1.75853800  |
| H  | -3.90728200 | 1.89217500  | 0.62267800  |
| C  | -5.16930200 | -1.68306600 | 1.42279400  |
| H  | -3.67459100 | -2.35933600 | 0.02509300  |
| C  | -5.75834400 | -0.58245300 | 2.04116500  |
| H  | -5.77164500 | 1.56481000  | 2.22412200  |
| H  | -5.53946100 | -2.68577500 | 1.62603300  |
| H  | -6.58584200 | -0.72490100 | 2.73285500  |
| Cu | 0.34757700  | 0.28055000  | -1.48887000 |
| O  | 1.83809200  | 0.43601100  | -2.52506300 |
| O  | 2.12648400  | -0.22972100 | -0.40714800 |
| C  | 3.23442300  | 0.49933600  | 0.05769800  |
| C  | 2.98500000  | 2.00002200  | 0.01080100  |
| H  | 2.05835400  | 2.27750200  | 0.52830600  |
| H  | 3.81450000  | 2.55736100  | 0.46156200  |
| H  | 2.89050500  | 2.29487400  | -1.03941000 |

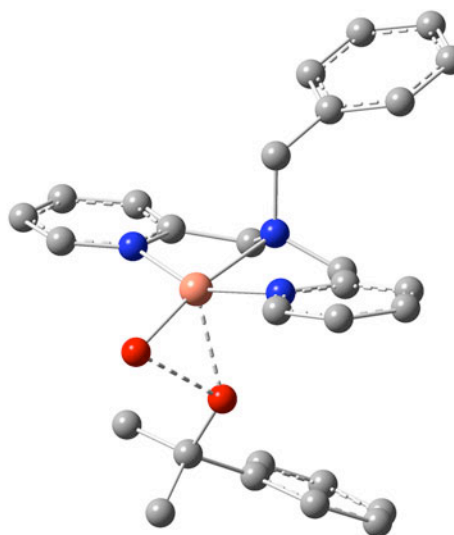

|   |            |             |             |
|---|------------|-------------|-------------|
| C | 4.48799100 | 0.14775300  | -0.73170300 |
| H | 5.36984900 | 0.65113200  | -0.31916100 |
| H | 4.67474300 | -0.93005400 | -0.73364500 |
| H | 4.35044900 | 0.46732500  | -1.77032900 |
| C | 3.22086200 | -0.08574200 | 1.47837500  |
| C | 2.90415700 | 0.68476100  | 2.60578200  |
| C | 3.44382300 | -1.46440800 | 1.64216300  |
| C | 2.87272800 | 0.10275100  | 3.86859000  |
| H | 2.73026400 | 1.75414800  | 2.50730100  |
| C | 3.39867900 | -2.04507500 | 2.90335500  |
| H | 3.65325200 | -2.07703100 | 0.76793000  |
| C | 3.11449500 | -1.26273400 | 4.02160800  |
| H | 2.66840100 | 0.72028300  | 4.74119700  |
| H | 3.58865600 | -3.11056300 | 3.01606400  |
| H | 3.08496500 | -1.71360800 | 5.01149700  |

### 5c

Energy: -1596.69438272 a.u.

|   |             |             |             |
|---|-------------|-------------|-------------|
| C | -1.25177800 | -2.10463000 | -2.47963200 |
| C | -1.23977000 | -3.48966600 | -2.57873200 |
| C | -0.56423700 | -4.22211600 | -1.60585200 |
| C | 0.06404400  | -3.55101900 | -0.56034600 |
| C | -0.00011900 | -2.16406900 | -0.51690100 |
| N | -0.63569800 | -1.46289600 | -1.47823200 |
| H | -0.52824900 | -5.30796600 | -1.66005200 |
| H | -1.76418500 | -1.47243400 | -3.20332600 |
| H | -1.74524800 | -3.97874400 | -3.40676300 |
| H | 0.58954000  | -4.09306300 | 0.22389700  |
| C | 0.56895200  | -1.32605600 | 0.59572200  |
| H | -0.23147000 | -1.11198300 | 1.32274000  |
| H | 1.37500700  | -1.84872500 | 1.13210500  |
| N | 1.01800000  | -0.04375800 | 0.02683300  |
| C | 1.14761000  | 1.06010300  | 0.99043100  |
| H | 2.04371200  | 0.95696900  | 1.62093800  |
| H | 0.26691100  | 1.01628300  | 1.64946900  |
| C | 1.13714700  | 2.36811300  | 0.23845700  |
| C | 1.75071500  | 3.52409800  | 0.70462300  |
| N | 0.44256000  | 2.35689000  | -0.91538000 |
| C | 1.61729700  | 4.69866200  | -0.03250000 |
| H | 2.31777200  | 3.50406700  | 1.63383200  |
| C | 0.30071100  | 3.48525500  | -1.61719200 |
| C | 0.87689700  | 4.68294800  | -1.21006700 |
| H | 2.08661600  | 5.61735800  | 0.31242900  |
| H | -0.30286300 | 3.40588900  | -2.51960300 |
| H | 0.74568000  | 5.58079800  | -1.80764700 |
| C | 2.24649000  | -0.20651900 | -0.82596100 |
| H | 2.40047200  | 0.75435000  | -1.33006300 |
| H | 1.98703400  | -0.93854200 | -1.60066700 |
| C | 3.47362900  | -0.62907700 | -0.07376100 |
| C | 3.78098500  | -1.98511000 | 0.08495400  |
| C | 4.32910600  | 0.32602800  | 0.48743700  |
| C | 4.90779600  | -2.37908100 | 0.80035300  |
| H | 3.14128000  | -2.73731600 | -0.38157900 |
| C | 5.45641800  | -0.06475200 | 1.20364500  |
| H | 4.11896000  | 1.38715100  | 0.33795800  |
| C | 5.74390400  | -1.41838000 | 1.36478500  |
| H | 5.14152700  | -3.43631900 | 0.90713900  |
| H | 6.11926500  | 0.68761900  | 1.62593600  |

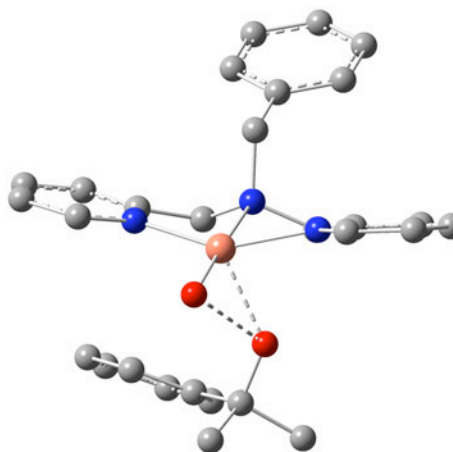

|    |             |             |             |
|----|-------------|-------------|-------------|
| H  | 6.62875400  | -1.72467000 | 1.91855100  |
| Cu | -0.60480700 | 0.54098200  | -1.13184500 |
| O  | -2.08513300 | 1.04845000  | -2.02633200 |
| O  | -1.89906100 | 1.70511900  | 0.19926300  |
| C  | -3.02414100 | 1.32464400  | 0.93512200  |
| C  | -4.30324800 | 1.59434800  | 0.13970200  |
| H  | -5.18925500 | 1.32808200  | 0.72710600  |
| H  | -4.35695200 | 2.65537900  | -0.12352200 |
| H  | -4.30185900 | 1.02432600  | -0.79266100 |
| C  | -2.89977700 | -0.13176200 | 1.37529900  |
| C  | -2.50434400 | -0.50536200 | 2.66554600  |
| C  | -3.13628300 | -1.14513000 | 0.43659500  |
| C  | -2.34664900 | -1.84843000 | 3.00681700  |
| H  | -2.33086500 | 0.25234500  | 3.42746800  |
| C  | -2.98844200 | -2.48604300 | 0.77769100  |
| H  | -3.43319500 | -0.87389500 | -0.57630400 |
| C  | -2.58571400 | -2.84427400 | 2.06291000  |
| H  | -2.04950100 | -2.11533400 | 4.01947700  |
| H  | -3.19004300 | -3.25636300 | 0.03353400  |
| H  | -2.47644100 | -3.89338100 | 2.33240500  |
| C  | -2.97461800 | 2.31587600  | 2.12304400  |
| H  | -3.79698700 | 2.08650900  | 2.81108300  |
| H  | -2.02707900 | 2.25464500  | 2.66801800  |
| H  | -3.09492600 | 3.33668400  | 1.75247600  |

**5d (structure *iv* in Figure 8)**

**Energy:** -1729.45013694 a.u.

|   |             |             |             |
|---|-------------|-------------|-------------|
| C | -0.17785200 | 2.98304400  | 1.29248000  |
| C | 0.22532300  | 4.30986000  | 1.22153600  |
| C | 1.21524800  | 4.65559400  | 0.30576400  |
| C | 1.76603600  | 3.66896100  | -0.50748300 |
| C | 1.30351800  | 2.36356200  | -0.38523900 |
| N | 0.35003800  | 2.03820600  | 0.50725800  |
| H | 1.55794000  | 5.68490900  | 0.22628300  |
| H | -0.95557800 | 2.64205700  | 1.97534500  |
| H | -0.22734200 | 5.05356700  | 1.87153900  |
| H | 2.54196700  | 3.90560800  | -1.23341800 |
| C | 1.76312500  | 1.23067900  | -1.26459500 |
| H | 1.07961700  | 1.15195900  | -2.12339100 |
| H | 2.77131400  | 1.41177200  | -1.66759400 |
| N | 1.67975400  | -0.03852400 | -0.52483700 |
| C | 1.58841200  | -1.22365700 | -1.39550500 |
| H | 2.56617600  | -1.50416400 | -1.81519800 |
| H | 0.93485800  | -0.95850000 | -2.23939100 |
| C | 0.95476100  | -2.36214900 | -0.64004800 |
| C | 1.23013600  | -3.70277900 | -0.88326900 |
| N | 0.03650300  | -1.99054100 | 0.26885100  |
| C | 0.51871800  | -4.67086400 | -0.17881000 |
| H | 1.98410800  | -3.98085300 | -1.61762600 |
| C | -0.65272600 | -2.91488100 | 0.94368500  |
| C | -0.44293800 | -4.27418300 | 0.74619400  |
| H | 0.71403300  | -5.72688500 | -0.35212400 |
| H | -1.39306900 | -2.52053200 | 1.64009800  |
| H | -1.02000900 | -5.00369800 | 1.30785300  |
| C | 2.76013600  | -0.17072200 | 0.51389700  |
| H | 2.50691000  | -1.06220500 | 1.10022200  |
| H | 2.63805400  | 0.68452800  | 1.18926100  |
| C | 4.15310600  | -0.24869500 | -0.03614300 |

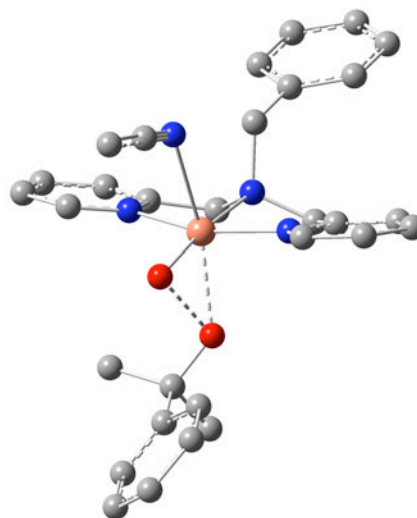

|    |             |             |             |
|----|-------------|-------------|-------------|
| C  | 4.90596400  | 0.91284200  | -0.24473400 |
| C  | 4.72536600  | -1.48577500 | -0.35465200 |
| C  | 6.19115500  | 0.84221500  | -0.77421400 |
| H  | 4.48596800  | 1.88052700  | 0.03769400  |
| C  | 6.01022200  | -1.56036800 | -0.88410000 |
| H  | 4.16263300  | -2.40100800 | -0.15944700 |
| C  | 6.74257900  | -0.39503900 | -1.09935600 |
| H  | 6.76878200  | 1.75248900  | -0.92164800 |
| H  | 6.44613700  | -2.52958800 | -1.11762600 |
| H  | 7.74958800  | -0.45219400 | -1.50711600 |
| Cu | -0.16479800 | 0.04910600  | 0.46614900  |
| O  | -1.88122900 | 0.10154300  | 1.10818200  |
| O  | -1.70947700 | -0.06522500 | -1.13345800 |
| C  | -2.77188100 | 0.71491300  | -1.54979400 |
| C  | -2.56602000 | 2.18413500  | -1.17988500 |
| H  | -1.60076100 | 2.53919900  | -1.56377800 |
| H  | -3.35263400 | 2.82229300  | -1.59587100 |
| H  | -2.57495600 | 2.27702000  | -0.08913700 |
| C  | -2.69211000 | 0.55434000  | -3.09923600 |
| H  | -2.80126100 | -0.49627500 | -3.38286600 |
| H  | -3.51008400 | 1.12777100  | -3.54891700 |
| H  | -1.73720300 | 0.93884300  | -3.47449100 |
| C  | -4.11395100 | 0.17450000  | -1.07357400 |
| C  | -5.29644100 | 0.87274200  | -1.33965400 |
| C  | -4.19074400 | -1.04549100 | -0.39878400 |
| C  | -6.52615300 | 0.37573100  | -0.92003300 |
| H  | -5.26381200 | 1.81720600  | -1.88392500 |
| C  | -5.42035900 | -1.54338100 | 0.02241700  |
| H  | -3.27211700 | -1.59065400 | -0.19633900 |
| C  | -6.59169400 | -0.83536700 | -0.23480600 |
| H  | -7.43582600 | 0.93441500  | -1.13222000 |
| H  | -5.46529000 | -2.49269200 | 0.55418600  |
| H  | -7.55298600 | -1.22738900 | 0.09182200  |
| C  | -0.22933000 | -0.12747800 | 3.76278800  |
| N  | 0.54995300  | -0.12756800 | 2.89526500  |
| C  | -1.22750400 | -0.13863800 | 4.80899600  |
| H  | -1.10661500 | -1.01834300 | 5.44918000  |
| H  | -1.14485300 | 0.75671400  | 5.43332900  |
| H  | -2.22723900 | -0.16344000 | 4.36035700  |

**5e (structure *v* in Figure 8)**

**Energy:** -1729.44511464 a.u.

|    |             |             |             |
|----|-------------|-------------|-------------|
| C  | 1.49248100  | 3.53083300  | 0.27680900  |
| C  | 2.46521600  | 4.44286400  | -0.10675700 |
| C  | 3.48236600  | 4.01419700  | -0.95441900 |
| C  | 3.48850000  | 2.69421900  | -1.39569600 |
| C  | 2.47332000  | 1.83913300  | -0.98398500 |
| N  | 1.49737200  | 2.26204400  | -0.15372500 |
| H  | 4.26698200  | 4.69982500  | -1.26621100 |
| H  | 0.67781800  | 3.80166900  | 0.94806300  |
| H  | 2.42641500  | 5.46403400  | 0.26141200  |
| H  | 4.27029400  | 2.32548100  | -2.05702400 |
| C  | 2.34497200  | 0.41799200  | -1.46190000 |
| H  | 1.70939500  | 0.40220300  | -2.35939700 |
| H  | 3.32153500  | 0.00306700  | -1.75561900 |
| N  | 1.68535800  | -0.39931500 | -0.43508700 |
| C  | 0.98029000  | -1.57643000 | -0.95823200 |
| H  | 1.66328900  | -2.42294000 | -1.12858800 |
| H  | 0.56398700  | -1.30648400 | -1.93974100 |
| C  | -0.14447700 | -1.95789100 | -0.03327000 |
| C  | -0.64203700 | -3.25269600 | 0.05236400  |
| N  | -0.68787700 | -0.94777100 | 0.67765700  |
| C  | -1.73138500 | -3.50463500 | 0.88111600  |
| H  | -0.17989400 | -4.04799500 | -0.52959100 |
| C  | -1.72528700 | -1.19341400 | 1.49158300  |
| C  | -2.27952800 | -2.45933100 | 1.61650500  |
| H  | -2.14253600 | -4.50895100 | 0.95685300  |
| H  | -2.11037800 | -0.33850800 | 2.04075600  |
| H  | -3.12890900 | -2.61314100 | 2.27594400  |
| C  | 2.59556700  | -0.73225700 | 0.71953000  |
| H  | 1.95787300  | -1.18757700 | 1.48731100  |
| H  | 2.92975000  | 0.22852800  | 1.13082200  |
| C  | 3.75378500  | -1.61525800 | 0.36356800  |
| C  | 4.97101000  | -1.06282100 | -0.05231300 |
| C  | 3.63804900  | -3.00851000 | 0.43777100  |
| C  | 6.04054400  | -1.88143100 | -0.40276200 |
| H  | 5.08789600  | 0.02272800  | -0.07122300 |
| C  | 4.70567300  | -3.82984700 | 0.08784500  |
| H  | 2.70865100  | -3.45045300 | 0.80274100  |
| C  | 5.90635200  | -3.26652600 | -0.33844600 |
| H  | 6.98474100  | -1.43867300 | -0.71299900 |
| H  | 4.60597900  | -4.91080100 | 0.16131000  |
| H  | 6.74390800  | -3.90748400 | -0.60522700 |
| Cu | 0.21621400  | 0.83767700  | 0.45336100  |
| C  | -0.35468800 | 2.01828300  | 2.74784200  |
| N  | 0.47617000  | 1.18102000  | 2.56680300  |
| C  | -1.36358100 | 2.95993700  | 2.66223400  |
| H  | -1.07454500 | 3.98784300  | 2.88686100  |
| H  | -1.53638000 | 2.63843300  | 1.07973600  |
| H  | -2.30872200 | 2.67429200  | 3.12768300  |
| O  | -1.43691600 | 2.16909700  | 0.08164100  |
| O  | -2.56715600 | 1.23015800  | 0.15251600  |
| C  | -3.10912900 | 1.03472900  | -1.18627200 |
| C  | -1.98931000 | 0.71493300  | -2.16602200 |
| H  | -1.40580400 | -0.15222400 | -1.82995100 |
| H  | -2.39535000 | 0.48952800  | -3.15828100 |
| H  | -1.31992600 | 1.57550100  | -2.26494500 |
| C  | -3.85589000 | 2.28785700  | -1.62134300 |
| H  | -4.30899400 | 2.14571400  | -2.60892200 |
| H  | -4.65358400 | 2.53742900  | -0.91487400 |
| H  | -3.16570700 | 3.13682900  | -1.67595300 |
| C  | -4.03815700 | -0.13940900 | -0.91483600 |

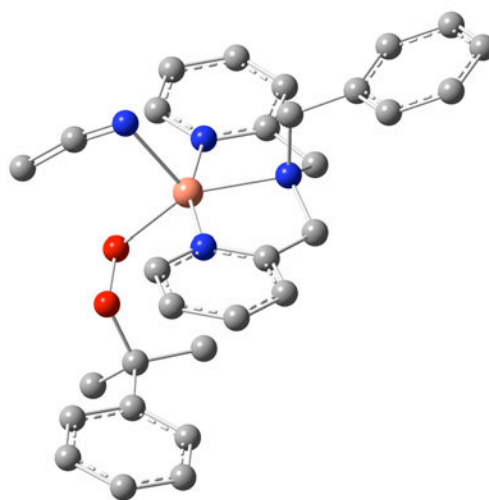



|   |             |             |             |
|---|-------------|-------------|-------------|
| C | -3.92454800 | -1.36040000 | -1.58449600 |
| C | -5.01595000 | -0.00996500 | 0.08102000  |
| C | -4.77454800 | -2.42107900 | -1.27766600 |
| H | -3.17834400 | -1.49196600 | -2.36612400 |
| C | -5.85627400 | -1.07180500 | 0.39693900  |
| H | -5.10830500 | 0.93186200  | 0.61978400  |
| C | -5.73929800 | -2.28233300 | -0.28421500 |
| H | -4.68333200 | -3.35889800 | -1.82332800 |
| H | -6.61132400 | -0.95108800 | 1.17152000  |
| H | -6.40549600 | -3.10994400 | -0.04804300 |

## 6) – Cyclohexadiene (CHD) Oxidation (Bpa)

### 6a (structure *vi* in Figure 8)

Energy: -1830.10369032 a.u.

|    |             |             |             |
|----|-------------|-------------|-------------|
| C  | -1.03632500 | -2.35038000 | 0.16175800  |
| C  | -1.01386100 | -3.71705900 | 0.40122200  |
| C  | 0.15060400  | -4.28150500 | 0.91333700  |
| C  | 1.24551500  | -3.45886900 | 1.16030600  |
| C  | 1.14982600  | -2.09644500 | 0.89484200  |
| N  | 0.01883100  | -1.55631400 | 0.39674100  |
| H  | 0.20940800  | -5.34960700 | 1.11174700  |
| H  | -1.92017300 | -1.84957800 | -0.23671100 |
| H  | -1.89214200 | -4.32067800 | 0.18556600  |
| H  | 2.17543200  | -3.86522800 | 1.55525000  |
| C  | 2.28127100  | -1.14116300 | 1.19797500  |
| H  | 2.13426800  | -0.75072100 | 2.21613600  |
| H  | 3.24530300  | -1.67775000 | 1.20080600  |
| N  | 2.25926200  | -0.00705800 | 0.28557000  |
| C  | 2.80038400  | 1.24202700  | 0.80277100  |
| H  | 3.89596900  | 1.31763600  | 0.69580100  |
| H  | 2.59114400  | 1.27063900  | 1.88250800  |
| C  | 2.12645800  | 2.42744300  | 0.14977500  |
| C  | 2.79799000  | 3.62250300  | -0.08365700 |
| N  | 0.81938000  | 2.28377600  | -0.15713200 |
| C  | 2.10601300  | 4.69802600  | -0.63263400 |
| H  | 3.85461700  | 3.70318600  | 0.16713600  |
| C  | 0.15255800  | 3.32135800  | -0.68891100 |
| C  | 0.75744500  | 4.54583000  | -0.93930900 |
| H  | 2.61528700  | 5.64032400  | -0.82260500 |
| H  | -0.89934300 | 3.13760100  | -0.90361800 |
| H  | 0.17970700  | 5.35868200  | -1.37095800 |
| C  | 2.73730200  | -0.33641200 | -1.08314900 |
| H  | 2.50121900  | 0.53289700  | -1.71301700 |
| H  | 2.11184500  | -1.16670300 | -1.43995600 |
| C  | 4.19485800  | -0.68657200 | -1.17496300 |
| C  | 4.62022200  | -2.01092300 | -1.01962300 |
| C  | 5.15756200  | 0.30637100  | -1.38991300 |
| C  | 5.97339600  | -2.33376300 | -1.06181700 |
| H  | 3.87629900  | -2.79986300 | -0.89003400 |
| C  | 6.51178800  | -0.01261400 | -1.43237300 |
| H  | 4.83604100  | 1.33714900  | -1.55332300 |
| C  | 6.92150400  | -1.33319000 | -1.26312200 |
| H  | 6.28863200  | -3.36929300 | -0.95004800 |
| H  | 7.24846500  | 0.76820800  | -1.61073200 |
| H  | 7.97923200  | -1.58476100 | -1.30285800 |
| Cu | 0.02585300  | 0.44174300  | 0.11321200  |

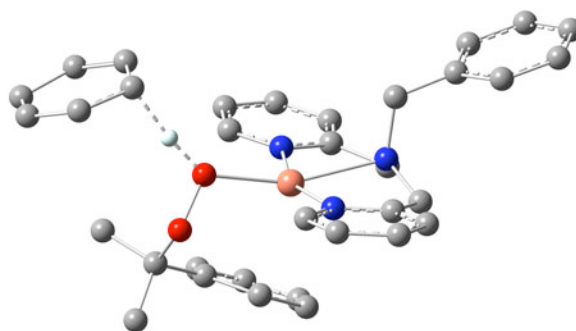



|   |             |             |             |
|---|-------------|-------------|-------------|
| O | -1.85687000 | 0.67356700  | -0.71305400 |
| O | -2.65654500 | 1.67663400  | -0.02979200 |
| C | -3.32829600 | 1.05687400  | 1.10338700  |
| C | -4.33190300 | 0.03227700  | 0.60605600  |
| H | -3.83786300 | -0.79836800 | 0.08514300  |
| H | -4.92382700 | -0.37881700 | 1.43148000  |
| H | -5.01795200 | 0.51018600  | -0.10054900 |
| C | -4.04055400 | 2.24786300  | 1.73645000  |
| H | -4.59527900 | 1.92209500  | 2.62252900  |
| H | -3.32750200 | 3.01918200  | 2.04619600  |
| H | -4.74808000 | 2.69125900  | 1.02760900  |
| C | -2.27713000 | 0.49100800  | 2.04853200  |
| C | -2.37821700 | -0.77320300 | 2.63147500  |
| C | -1.15580200 | 1.27754000  | 2.35737900  |
| C | -1.38718400 | -1.24750900 | 3.49169600  |
| H | -3.23522600 | -1.40772800 | 2.41146600  |
| C | -0.16466300 | 0.80744400  | 3.21872400  |
| H | -1.08107200 | 2.27940800  | 1.93409700  |
| C | -0.27711500 | -0.46199500 | 3.78706700  |
| H | -1.48823100 | -2.23724400 | 3.93448100  |
| H | 0.68112100  | 1.44902300  | 3.46780100  |
| H | 0.48714000  | -0.82765600 | 4.47146500  |
| C | -4.34623900 | 0.50019600  | -2.96849900 |
| C | -5.49694200 | -0.15707400 | -2.69303200 |
| C | -4.18751100 | -2.26174500 | -2.38443600 |
| C | -3.05971800 | -1.57884100 | -2.68890400 |
| H | -4.38253100 | 1.54995200  | -3.25867500 |
| H | -6.45263600 | 0.36049500  | -2.76604900 |
| H | -4.15071300 | -3.34073500 | -2.23363300 |
| H | -2.11346900 | -2.11553500 | -2.77800200 |
| C | -5.52428500 | -1.59900000 | -2.30500800 |
| H | -5.94578500 | -1.70820800 | -1.28497600 |
| H | -6.25451000 | -2.14745800 | -2.92756000 |
| C | -3.05343200 | -0.14211100 | -2.87749200 |
| H | -2.25968100 | 0.26527100  | -3.51232500 |
| H | -2.46297600 | 0.34943000  | -1.66366800 |

## 6b

Energy: -1830.09259931 a.u.

|   |             |             |             |
|---|-------------|-------------|-------------|
| C | 0.23792100  | 2.77218300  | -1.29844000 |
| C | 0.72030600  | 4.04813200  | -1.55530100 |
| C | 2.07916100  | 4.20861300  | -1.80560100 |
| C | 2.90094300  | 3.08486100  | -1.79354400 |
| C | 2.34709200  | 1.83575700  | -1.53785400 |
| N | 1.02711800  | 1.68503200  | -1.28802500 |
| H | 2.49605300  | 5.19388200  | -2.00205200 |
| H | -0.81398900 | 2.59027800  | -1.07706200 |
| H | 0.03750900  | 4.89444700  | -1.55142800 |
| H | 3.96964300  | 3.16899600  | -1.98433200 |
| C | 3.16414300  | 0.56794300  | -1.58864900 |
| H | 3.02492500  | 0.10960300  | -2.57819900 |
| H | 4.23915400  | 0.79484900  | -1.49975500 |
| N | 2.70046200  | -0.39222700 | -0.58963300 |
| C | 2.85723400  | -1.79615000 | -0.96294100 |
| H | 3.86023000  | -2.19244800 | -0.73425900 |
| H | 2.73807900  | -1.86155000 | -2.05404500 |
| C | 1.79294900  | -2.64878400 | -0.31753200 |
| C | 2.05134500  | -3.94855300 | 0.09986800  |

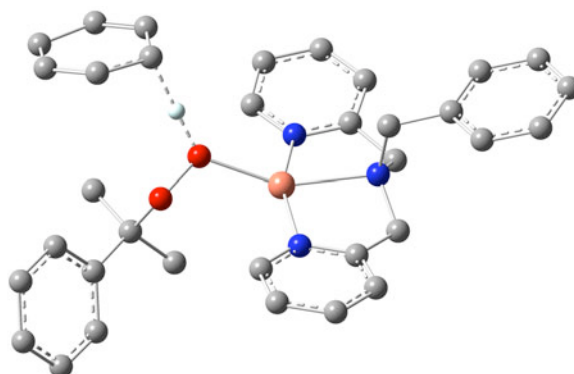

|    |             |             |             |
|----|-------------|-------------|-------------|
| N  | 0.55761800  | -2.10402000 | -0.21974500 |
| C  | 1.01553600  | -4.71963200 | 0.61944600  |
| H  | 3.05999800  | -4.34891500 | 0.01039200  |
| C  | -0.44033400 | -2.84991500 | 0.28993800  |
| C  | -0.25315900 | -4.15922200 | 0.71337900  |
| H  | 1.20019300  | -5.73923700 | 0.95059500  |
| H  | -1.40683900 | -2.35166300 | 0.35827900  |
| H  | -1.09319600 | -4.71965500 | 1.11454500  |
| C  | 3.18067300  | -0.08821200 | 0.78813500  |
| H  | 2.62354400  | -0.75389700 | 1.46258100  |
| H  | 2.85430800  | 0.93843200  | 1.00804400  |
| C  | 4.66048300  | -0.23447000 | 0.99669900  |
| C  | 5.52378800  | 0.84573900  | 0.78041800  |
| C  | 5.20633600  | -1.46122400 | 1.39207600  |
| C  | 6.89910200  | 0.69997700  | 0.93682200  |
| H  | 5.10685800  | 1.81910400  | 0.51327900  |
| C  | 6.58099700  | -1.61072600 | 1.54969200  |
| H  | 4.53947700  | -2.29947100 | 1.60443100  |
| C  | 7.42958200  | -0.53086900 | 1.31647900  |
| H  | 7.55752600  | 1.55109800  | 0.77518200  |
| H  | 6.99054700  | -2.56749500 | 1.86739700  |
| H  | 8.50383800  | -0.64450100 | 1.44552400  |
| Cu | 0.46830700  | -0.12008500 | -0.54591100 |
| O  | -1.24430200 | 0.61808000  | 0.26666700  |
| O  | -2.33429900 | -0.33542100 | 0.33355400  |
| C  | -3.17590900 | -0.21662800 | -0.86465200 |
| C  | -2.33460400 | -0.49140200 | -2.10039100 |
| H  | -1.81983300 | -1.45834300 | -2.03310400 |
| H  | -2.95249100 | -0.49477600 | -3.00529100 |
| H  | -1.58128700 | 0.29678500  | -2.22457900 |
| C  | -3.79296500 | 1.17294500  | -0.93183700 |
| H  | -4.41156100 | 1.27059300  | -1.83101300 |
| H  | -4.42226900 | 1.36399300  | -0.05758100 |
| H  | -3.01133600 | 1.94320000  | -0.96583900 |
| C  | -4.22098300 | -1.28005800 | -0.57282100 |
| C  | -4.46560900 | -2.35360900 | -1.43259500 |
| C  | -4.96064300 | -1.18697800 | 0.61395700  |
| C  | -5.44018400 | -3.30069300 | -1.12398400 |
| H  | -3.90619900 | -2.45329000 | -2.36087100 |
| C  | -5.92453100 | -2.13741300 | 0.92745100  |
| H  | -4.76520200 | -0.36218900 | 1.29942100  |
| C  | -6.17046400 | -3.19664000 | 0.05564700  |
| H  | -5.62775800 | -4.12294700 | -1.81194700 |
| H  | -6.48919100 | -2.05064700 | 1.85388200  |
| H  | -6.93080400 | -3.93742700 | 0.29515500  |
| C  | -3.12816400 | 1.93763800  | 2.57969400  |
| C  | -4.26649900 | 2.60463300  | 2.27420100  |
| C  | -2.90216100 | 4.34371900  | 1.11008700  |
| C  | -1.78361400 | 3.66268200  | 1.44640200  |
| H  | -3.17746600 | 1.03730600  | 3.19203800  |
| H  | -5.22618500 | 2.24588800  | 2.64569400  |
| H  | -2.82723700 | 5.30747100  | 0.60707400  |
| H  | -0.80502600 | 4.08494000  | 1.21316300  |
| C  | -4.26926200 | 3.85326900  | 1.45565000  |
| H  | -4.86433600 | 3.70205200  | 0.53280800  |
| H  | -4.83344800 | 4.64800400  | 1.97712400  |
| C  | -1.83294700 | 2.36839000  | 2.09817400  |
| H  | -0.96990000 | 2.09924800  | 2.71711500  |
| H  | -1.52816500 | 1.42616900  | 1.09067200  |

6c

Energy: -1830.09266567 a.u.

|    |             |             |             |
|----|-------------|-------------|-------------|
| C  | 0.18392300  | 2.55821900  | 1.41913600  |
| C  | -0.13369700 | 3.87516000  | 1.72469400  |
| C  | -1.45357100 | 4.19289200  | 2.02474900  |
| C  | -2.40776500 | 3.17967900  | 2.00929000  |
| C  | -2.02041100 | 1.88094800  | 1.70094300  |
| N  | -0.73683200 | 1.57699900  | 1.40409200  |
| H  | -1.74015600 | 5.21524600  | 2.26180800  |
| H  | 1.19759900  | 2.24936200  | 1.16599200  |
| H  | 0.64633600  | 4.63177400  | 1.71834900  |
| H  | -3.45243900 | 3.38761600  | 2.23548400  |
| C  | -3.00127500 | 0.73221300  | 1.72438600  |
| H  | -2.92780600 | 0.22684200  | 2.69831900  |
| H  | -4.03469200 | 1.10994300  | 1.64576700  |
| N  | -2.66962400 | -0.24445400 | 0.69478500  |
| C  | -3.06794400 | -1.61875200 | 0.97045700  |
| H  | -4.11466600 | -1.82986400 | 0.69373400  |
| H  | -2.99596900 | -1.77580400 | 2.05649400  |
| C  | -2.13731400 | -2.58855700 | 0.28004400  |
| C  | -2.57391100 | -3.81937800 | -0.19771100 |
| N  | -0.84369400 | -2.21407300 | 0.18350900  |
| C  | -1.65708800 | -4.69304900 | -0.77525400 |
| H  | -3.62619400 | -4.08583700 | -0.11187100 |
| C  | 0.03604800  | -3.05340500 | -0.38635900 |
| C  | -0.32493700 | -4.30299600 | -0.87058800 |
| H  | -1.98104100 | -5.66076200 | -1.15198500 |
| H  | 1.06339100  | -2.69102000 | -0.44126200 |
| H  | 0.42757100  | -4.94780600 | -1.31807700 |
| C  | -3.01189400 | 0.20618600  | -0.68116000 |
| H  | -2.54152200 | -0.51055800 | -1.36999000 |
| H  | -2.50225900 | 1.16943000  | -0.82836800 |
| C  | -4.48257800 | 0.32972600  | -0.95717200 |
| C  | -5.15863200 | 1.52796300  | -0.69980300 |
| C  | -5.21095400 | -0.76018700 | -1.44740800 |
| C  | -6.53060000 | 1.63009300  | -0.91032500 |
| H  | -4.59448900 | 2.39693800  | -0.35455900 |
| C  | -6.58302700 | -0.66165800 | -1.65933000 |
| H  | -4.68788500 | -1.68787600 | -1.68921800 |
| C  | -7.24536800 | 0.53283900  | -1.38543700 |
| H  | -7.04175200 | 2.57071500  | -0.71512600 |
| H  | -7.13498500 | -1.51406800 | -2.05032500 |
| H  | -8.31681900 | 0.61316200  | -1.55614500 |
| Cu | -0.39973100 | -0.32232800 | 0.79391600  |
| O  | 1.62919800  | -0.62601900 | 0.72442000  |
| O  | 2.36002900  | 0.57080900  | 0.34669700  |
| C  | 2.44681100  | 0.67772900  | -1.11481100 |
| C  | 1.04888900  | 0.69040600  | -1.71510400 |
| H  | 0.41571200  | 1.46057800  | -1.25471100 |
| H  | 1.08743800  | 0.88089000  | -2.79362300 |
| H  | 0.57091100  | -0.28877800 | -1.57821400 |
| C  | 3.25264400  | -0.48476000 | -1.67530700 |
| H  | 3.28562500  | -0.43402700 | -2.76958100 |
| H  | 4.27917400  | -0.47103900 | -1.29830200 |
| H  | 2.79664500  | -1.44195300 | -1.38797800 |
| C  | 3.18606700  | 1.99911100  | -1.24302100 |
| C  | 2.65154000  | 3.10104700  | -1.91545800 |

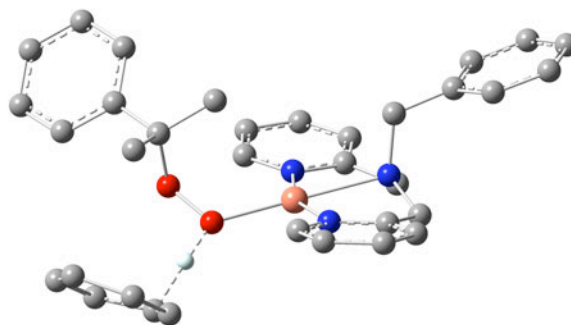

|   |            |             |             |
|---|------------|-------------|-------------|
| C | 4.44233900 | 2.12730900  | -0.63540200 |
| C | 3.36452200 | 4.29534900  | -1.99875100 |
| H | 1.67662200 | 3.03397400  | -2.39474900 |
| C | 5.14907400 | 3.32162800  | -0.70907700 |
| H | 4.85900400 | 1.28079400  | -0.08952800 |
| C | 4.61321900 | 4.40953600  | -1.39589600 |
| H | 2.93985700 | 5.13892800  | -2.53978500 |
| H | 6.12324500 | 3.40410200  | -0.23085900 |
| H | 5.16913500 | 5.34273100  | -1.46144800 |
| C | 4.67821900 | -1.51937600 | 1.49534600  |
| C | 5.58150900 | -1.85717100 | 0.54431300  |
| C | 4.17386000 | -3.83351500 | -0.04944100 |
| C | 3.30219500 | -3.47839700 | 0.92277100  |
| H | 4.87216800 | -0.66609900 | 2.14519100  |
| H | 6.50108300 | -1.28248700 | 0.43554100  |
| H | 4.03116200 | -4.76245700 | -0.60103600 |
| H | 2.45797200 | -4.13068500 | 1.15226400  |
| C | 5.38816200 | -3.02430100 | -0.36700900 |
| H | 5.35490200 | -2.68367200 | -1.42154300 |
| H | 6.28480300 | -3.67075000 | -0.35206200 |
| C | 3.44004100 | -2.24578100 | 1.67098700  |
| H | 2.99775100 | -2.22542500 | 2.67241200  |
| H | 2.45540200 | -1.35265200 | 1.12604900  |

6d

Energy: -1830.09259928 a.u.

|   |             |             |             |
|---|-------------|-------------|-------------|
| C | 0.23789700  | 2.77229400  | -1.29829200 |
| C | 0.72025000  | 4.04826400  | -1.55510900 |
| C | 2.07910000  | 4.20878600  | -1.80541500 |
| C | 2.90090600  | 3.08505200  | -1.79340800 |
| C | 2.34708700  | 1.83592600  | -1.53775700 |
| N | 1.02711900  | 1.68516000  | -1.28791900 |
| H | 2.49596800  | 5.19407200  | -2.00183100 |
| H | -0.81400600 | 2.59036100  | -1.07691500 |
| H | 0.03743100  | 4.89456200  | -1.55119700 |
| H | 3.96960300  | 3.16921900  | -1.98419900 |
| C | 3.16417700  | 0.56813800  | -1.58861300 |
| H | 3.02501700  | 0.10985600  | -2.57819800 |
| H | 4.23917700  | 0.79507300  | -1.49966200 |
| N | 2.70050100  | -0.39210800 | -0.58966500 |
| C | 2.85725700  | -1.79600600 | -0.96308300 |
| H | 3.86029000  | -2.19230200 | -0.73456000 |
| H | 2.73794900  | -1.86133400 | -2.05417400 |
| C | 1.79306600  | -2.64868100 | -0.31758200 |
| C | 2.05152700  | -3.94844700 | 0.09978500  |
| N | 0.55773500  | -2.10394200 | -0.21967800 |
| C | 1.01577900  | -4.71954800 | 0.61945300  |
| H | 3.06017800  | -4.34879200 | 0.01020900  |
| C | -0.44015700 | -2.84985600 | 0.29009100  |
| C | -0.25291800 | -4.15916300 | 0.71350700  |
| H | 1.20048400  | -5.73915200 | 0.95057700  |
| H | -1.40666500 | -2.35162200 | 0.35851500  |
| H | -1.09290700 | -4.71961800 | 1.11474400  |
| C | 3.18076100  | -0.08819800 | 0.78811300  |
| H | 2.62363000  | -0.75390700 | 1.46253400  |
| H | 2.85443300  | 0.93844300  | 1.00809200  |
| C | 4.66057100  | -0.23450700 | 0.99663600  |
| C | 5.52389300  | 0.84571200  | 0.78046900  |

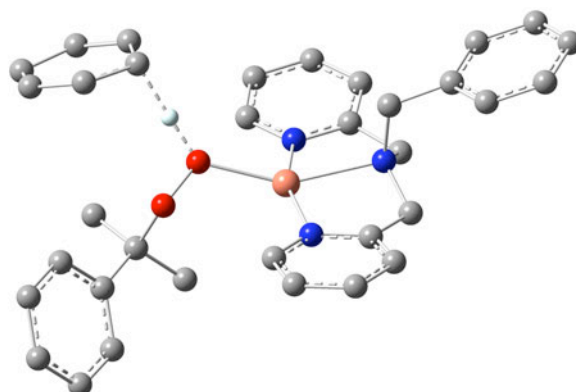

|    |             |             |             |
|----|-------------|-------------|-------------|
| C  | 5.20640600  | -1.46131200 | 1.39187800  |
| C  | 6.89920400  | 0.69991100  | 0.93685400  |
| H  | 5.10697800  | 1.81911200  | 0.51343700  |
| C  | 6.58106400  | -1.61085400 | 1.54947500  |
| H  | 4.53953200  | -2.29957000 | 1.60414700  |
| C  | 7.42966600  | -0.53098400 | 1.31637800  |
| H  | 7.55764200  | 1.55104000  | 0.77530700  |
| H  | 6.99060000  | -2.56766200 | 1.86707700  |
| H  | 8.50392000  | -0.64464600 | 1.44541100  |
| Cu | 0.46837700  | -0.11998300 | -0.54578600 |
| O  | -1.24438200 | 0.61798000  | 0.26658100  |
| O  | -2.33435400 | -0.33556900 | 0.33342800  |
| C  | -3.17592600 | -0.21677500 | -0.86480000 |
| C  | -2.33461100 | -0.49167300 | -2.10050300 |
| H  | -1.81976700 | -1.45856500 | -2.03307200 |
| H  | -2.95250300 | -0.49523500 | -3.00540000 |
| H  | -1.58135000 | 0.29654800  | -2.22481100 |
| C  | -3.79288100 | 1.17283800  | -0.93209000 |
| H  | -4.41151700 | 1.27043100  | -1.83124400 |
| H  | -4.42211900 | 1.36403100  | -0.05781900 |
| H  | -3.01120000 | 1.94303000  | -0.96622500 |
| C  | -4.22108500 | -1.28010600 | -0.57291500 |
| C  | -4.46562300 | -2.35383000 | -1.43249700 |
| C  | -4.96088200 | -1.18677300 | 0.61375800  |
| C  | -5.44026600 | -3.30082300 | -1.12381600 |
| H  | -3.90609900 | -2.45371500 | -2.36068200 |
| C  | -5.92483900 | -2.13711300 | 0.92732200  |
| H  | -4.76548600 | -0.36186200 | 1.29908900  |
| C  | -6.17069600 | -3.19650600 | 0.05569900  |
| H  | -5.62777600 | -4.12321200 | -1.81163500 |
| H  | -6.48961000 | -2.05014600 | 1.85366700  |
| H  | -6.93108900 | -3.93722300 | 0.29525900  |
| C  | -3.12844800 | 1.93737600  | 2.57956200  |
| C  | -4.26671700 | 2.60444600  | 2.27398600  |
| C  | -2.90215300 | 4.34359300  | 1.11022700  |
| C  | -1.78367700 | 3.66248100  | 1.44663100  |
| H  | -3.17786600 | 1.03699200  | 3.19182200  |
| H  | -5.22646500 | 2.24571100  | 2.64532800  |
| H  | -2.82712400 | 5.30739700  | 0.60732900  |
| H  | -0.80504000 | 4.08472500  | 1.21356700  |
| C  | -4.26932100 | 3.85316100  | 1.45555500  |
| H  | -4.86427900 | 3.70206100  | 0.53261900  |
| H  | -4.83354400 | 4.64786600  | 1.97703400  |
| C  | -1.83315200 | 2.36811700  | 2.09824700  |
| H  | -0.97020000 | 2.09886500  | 2.71727300  |
| H  | -1.52827500 | 1.42596700  | 1.09064700  |

6e

Energy: -1830.10634117 a.u.

|    |             |             |             |
|----|-------------|-------------|-------------|
| C  | -1.46420400 | -1.13221900 | 2.33856000  |
| C  | -2.33748800 | -1.88316400 | 3.11088900  |
| C  | -2.59769700 | -3.19791400 | 2.73331200  |
| C  | -1.98334000 | -3.70393400 | 1.59478000  |
| C  | -1.11945300 | -2.89104600 | 0.86539100  |
| N  | -0.85831300 | -1.62643400 | 1.24389200  |
| H  | -3.27813100 | -3.81811200 | 3.31290600  |
| H  | -1.21485600 | -0.09881200 | 2.58096600  |
| H  | -2.80454200 | -1.44201300 | 3.98727400  |
| H  | -2.17454200 | -4.72258500 | 1.26010800  |
| C  | -0.39035700 | -3.42747600 | -0.35012600 |
| H  | 0.51914400  | -3.93834900 | -0.00187400 |
| H  | -1.00812600 | -4.20576100 | -0.83242100 |
| N  | 0.01082000  | -2.39023000 | -1.29684900 |
| C  | 1.33155400  | -2.55997900 | -1.89465900 |
| H  | 1.32456400  | -3.23637400 | -2.76782700 |
| H  | 1.98551800  | -3.02239300 | -1.14037500 |
| C  | 1.92908800  | -1.22650000 | -2.28161000 |
| C  | 2.81172300  | -1.09907400 | -3.34927800 |
| N  | 1.59715700  | -0.17052200 | -1.51232200 |
| C  | 3.36492400  | 0.14584700  | -3.63194400 |
| H  | 3.05567400  | -1.97078900 | -3.95404300 |
| C  | 2.12965500  | 1.02902800  | -1.78995000 |
| C  | 3.01397600  | 1.23452600  | -2.83951300 |
| H  | 4.05358200  | 0.26504500  | -4.46561100 |
| H  | 1.82219400  | 1.83404100  | -1.12186400 |
| H  | 3.41520200  | 2.22672500  | -3.02913500 |
| C  | -1.02572200 | -2.09391900 | -2.31590900 |
| H  | -1.30730400 | -3.02345300 | -2.84284300 |
| H  | -0.55746900 | -1.42738800 | -3.05297000 |
| C  | -2.21938000 | -1.43267900 | -1.69114200 |
| C  | -3.34774300 | -2.16702800 | -1.32567300 |
| C  | -4.37284500 | -1.57167800 | -0.59187600 |
| H  | -3.41755000 | -3.22004600 | -1.60485400 |
| C  | -3.15281000 | 0.51075700  | -0.58091500 |
| C  | -4.26623500 | -0.23848500 | -0.20198900 |
| H  | -5.24886300 | -2.15435200 | -0.31306700 |
| H  | -3.04959800 | 1.54967100  | -0.26973500 |
| H  | -5.05539300 | 0.21995700  | 0.39149500  |
| Cu | 0.31848200  | -0.53299500 | 0.02129100  |
| O  | 0.14478900  | 1.44195400  | 0.65136400  |
| O  | 0.34118300  | 1.58740400  | 2.08375200  |
| C  | 1.75539200  | 1.81175900  | 2.36042100  |
| C  | -2.27363100 | 3.59097100  | -2.13009700 |
| C  | -3.08958700 | 4.20582300  | 0.14816000  |
| C  | -1.81660600 | 4.13849100  | 0.60452900  |
| C  | -1.01274100 | 3.53410600  | -1.64203000 |
| H  | -2.45851600 | 3.40620400  | -3.18773400 |
| H  | -3.89537800 | 4.49070100  | 0.82355600  |
| H  | -1.60725000 | 4.36606900  | 1.65045700  |
| H  | -0.18868800 | 3.31002600  | -2.32252000 |
| C  | -0.71085300 | 3.74733800  | -0.24210300 |
| H  | -0.29570400 | 2.45585900  | 0.28381200  |
| H  | 0.26118600  | 4.19963000  | -0.01590800 |
| C  | -3.44481700 | 3.96264800  | -1.28225300 |
| H  | -3.94249900 | 4.85745500  | -1.70301100 |
| H  | -4.23511000 | 3.19115300  | -1.36143100 |
| C  | 1.77324400  | 1.81853900  | 3.88536100  |
| H  | 2.79507700  | 1.97411400  | 4.24626400  |
| H  | 1.14187200  | 2.62539100  | 4.27296700  |

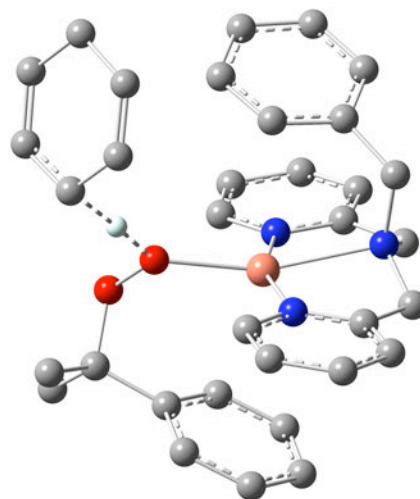

|   |             |             |             |
|---|-------------|-------------|-------------|
| H | 1.41026300  | 0.86840400  | 4.29152400  |
| C | 2.56227600  | 0.64711700  | 1.80337000  |
| C | 3.70062800  | 0.81679600  | 1.01316600  |
| C | 2.13959300  | -0.66034300 | 2.08308400  |
| C | 4.39004100  | -0.28404400 | 0.50329700  |
| H | 4.06135600  | 1.81784400  | 0.78183100  |
| C | 2.82250300  | -1.76288200 | 1.57337200  |
| H | 1.26838700  | -0.81030400 | 2.72015900  |
| C | 3.95142400  | -1.57644600 | 0.77522200  |
| H | 5.27562100  | -0.12641700 | -0.11045000 |
| H | 2.48030700  | -2.76857300 | 1.81957600  |
| H | 4.49695800  | -2.43426500 | 0.38449100  |
| C | 2.17419700  | 3.16585900  | 1.81521100  |
| H | 1.49139200  | 3.93828400  | 2.18539200  |
| H | 3.18715000  | 3.42851400  | 2.13977600  |
| H | 2.15489300  | 3.18246100  | 0.71939200  |
| C | -2.14832400 | -0.07978600 | -1.33992500 |
| H | -1.29051500 | 0.51866700  | -1.65848000 |

6f

Energy: -1962.85346300 a.u.

|   |             |             |             |
|---|-------------|-------------|-------------|
| C | 0.05282200  | 2.52030200  | 1.57255400  |
| C | -0.33197900 | 3.73770100  | 2.12069200  |
| C | -1.65318400 | 3.90306900  | 2.52187800  |
| C | -2.54178300 | 2.84455100  | 2.35748900  |
| C | -2.08616000 | 1.65157600  | 1.80768600  |
| N | -0.80215100 | 1.49549200  | 1.41692800  |
| H | -1.99128700 | 4.84466700  | 2.94941900  |
| H | 1.07095000  | 2.33208200  | 1.23173100  |
| H | 0.39585700  | 4.53855900  | 2.22058800  |
| H | -3.58662200 | 2.93596900  | 2.65084100  |
| C | -2.98852500 | 0.45302800  | 1.63488900  |
| H | -2.83942300 | -0.23044500 | 2.48410100  |
| H | -4.04722900 | 0.76428600  | 1.65296900  |
| N | -2.62169000 | -0.27444700 | 0.42712400  |
| C | -2.98597500 | -1.68327200 | 0.39349300  |
| H | -4.03439300 | -1.85495500 | 0.09462200  |
| H | -2.87732400 | -2.07485700 | 1.41565200  |
| C | -2.04794700 | -2.44232600 | -0.51599300 |
| C | -2.45429700 | -3.56176900 | -1.23536200 |
| N | -0.77618100 | -1.99481000 | -0.56738900 |
| C | -1.52429600 | -4.24941100 | -2.00973000 |
| H | -3.49218800 | -3.88753800 | -1.18294300 |
| C | 0.11492100  | -2.65441000 | -1.32066800 |
| C | -0.21175600 | -3.78904700 | -2.05156600 |
| H | -1.82291400 | -5.12847400 | -2.57694500 |
| H | 1.12721000  | -2.24686100 | -1.31277100 |
| H | 0.54887100  | -4.29019000 | -2.64528500 |
| C | -2.95238100 | 0.44999500  | -0.82698800 |
| H | -2.45900400 | -0.09647600 | -1.64305400 |
| H | -2.46111700 | 1.43062500  | -0.76028400 |
| C | -4.42279000 | 0.60311600  | -1.09192400 |
| C | -5.12549500 | 1.70490800  | -0.59106100 |
| C | -5.12479500 | -0.36835000 | -1.81416800 |
| C | -6.49693700 | 1.82694500  | -0.79415500 |
| H | -4.58151600 | 2.48644500  | -0.05620200 |
| C | -6.49640800 | -0.24983900 | -2.01961400 |
| H | -4.58112000 | -1.21422200 | -2.24038300 |

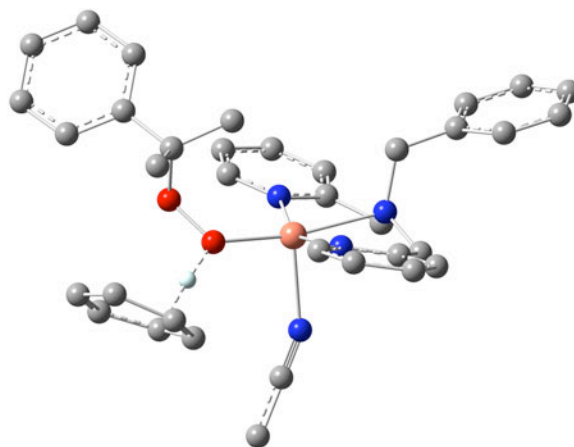



|    |             |             |             |
|----|-------------|-------------|-------------|
| C  | -7.18509500 | 0.84638600  | -1.50528100 |
| H  | -7.02859200 | 2.69419300  | -0.40734300 |
| H  | -7.02752800 | -1.00776500 | -2.59215100 |
| H  | -8.25612600 | 0.94354500  | -1.67033800 |
| Cu | -0.37755800 | -0.37425100 | 0.67158000  |
| O  | 1.64934900  | -0.44844700 | 0.41035300  |
| O  | 2.33020600  | 0.81627200  | 0.18814900  |
| C  | 2.40843200  | 1.10095900  | -1.24796600 |
| C  | 1.00699500  | 1.14795000  | -1.83680200 |
| H  | 0.36102900  | 1.84356600  | -1.28591400 |
| H  | 1.03368800  | 1.45954600  | -2.88720000 |
| H  | 0.55034300  | 0.15132700  | -1.80068800 |
| C  | 3.24444500  | 0.03644400  | -1.94491000 |
| H  | 3.27497000  | 0.22172600  | -3.02471500 |
| H  | 4.27115100  | 0.02639500  | -1.56710000 |
| H  | 2.81294000  | -0.95963300 | -1.77698800 |
| C  | 3.11565100  | 2.44603400  | -1.22437200 |
| C  | 2.55682600  | 3.60012600  | -1.77872500 |
| C  | 4.36930600  | 2.53843900  | -0.60493100 |
| C  | 3.24223600  | 4.81246500  | -1.73448200 |
| H  | 1.58343600  | 3.56090000  | -2.26376300 |
| C  | 5.04866600  | 3.74951300  | -0.55066100 |
| H  | 4.80679000  | 1.64891300  | -0.15204400 |
| C  | 4.48808000  | 4.89127800  | -1.12038300 |
| H  | 2.79785100  | 5.69849100  | -2.18417300 |
| H  | 6.02120700  | 3.80300500  | -0.06483200 |
| H  | 5.02255900  | 5.83865800  | -1.08641800 |
| C  | 4.73268600  | -1.54394100 | 0.97417400  |
| C  | 5.53312300  | -1.84933400 | -0.07344000 |
| C  | 3.91126400  | -3.62268600 | -0.75649700 |
| C  | 3.14814200  | -3.30708900 | 0.31470100  |
| H  | 5.04995800  | -0.78776900 | 1.69243300  |
| H  | 6.49115700  | -1.34458600 | -0.19458300 |
| H  | 3.64114500  | -4.46630900 | -1.39180800 |
| H  | 2.25403200  | -3.89763800 | 0.52976100  |
| C  | 5.16547500  | -2.88035400 | -1.09100900 |
| H  | 5.07470200  | -2.40935600 | -2.09103800 |
| H  | 5.99988700  | -3.59134700 | -1.23299700 |
| C  | 3.44475800  | -2.17321600 | 1.16566800  |
| H  | 3.07164300  | -2.21099900 | 2.19480500  |
| H  | 2.48189900  | -1.18261200 | 0.73851200  |
| C  | 0.14465800  | -2.29598600 | 3.28930500  |
| N  | -0.42017800 | -1.62583400 | 2.52127700  |
| C  | 0.84936400  | -3.12657600 | 4.24030100  |
| H  | 0.14688300  | -3.58635400 | 4.94302900  |
| H  | 1.39460000  | -3.92263800 | 3.72160800  |
| H  | 1.56748400  | -2.52709000 | 4.80959800  |

7) – [Cu<sup>II</sup>(tpa)(O<sub>2</sub>Cm)]<sup>+</sup>

7a

Energy: -1612.79766701 a.u.



|    |             |             |             |
|----|-------------|-------------|-------------|
| C  | -1.66522600 | 3.00459100  | -0.54824000 |
| C  | -2.47745400 | 4.11950200  | -0.38993900 |
| C  | -3.70547400 | 3.96366000  | 0.24583100  |
| C  | -4.08658200 | 2.69747000  | 0.68026400  |
| C  | -3.22725700 | 1.62483300  | 0.46851000  |
| N  | -2.02699800 | 1.78626900  | -0.12039200 |
| H  | -4.36215200 | 4.81705900  | 0.39943100  |
| H  | -0.69280400 | 3.04846500  | -1.03836400 |
| H  | -2.14791700 | 5.08882500  | -0.75387500 |
| H  | -5.04492700 | 2.53795400  | 1.17105800  |
| C  | -3.61097200 | 0.20489600  | 0.79496600  |
| H  | -4.35882900 | 0.17110100  | 1.60489100  |
| H  | -4.09166700 | -0.23398100 | -0.09216000 |
| N  | -2.43862200 | -0.62255300 | 1.09943300  |
| C  | -1.92470100 | -0.40951900 | 2.45722500  |
| H  | -2.55477800 | -0.89644200 | 3.22092600  |
| H  | -1.97025900 | 0.67305400  | 2.65097900  |
| C  | -0.49750800 | -0.88068100 | 2.55701300  |
| C  | 0.01918400  | -1.44811300 | 3.71599500  |
| N  | 0.25334600  | -0.70462500 | 1.44985000  |
| C  | 1.35564700  | -1.83840200 | 3.74040000  |
| H  | -0.62010800 | -1.58047600 | 4.58694900  |
| C  | 1.53497300  | -1.10254900 | 1.47139000  |
| C  | 2.12617700  | -1.66544600 | 2.59631900  |
| H  | 1.78233600  | -2.28094900 | 4.63791500  |
| H  | 2.08853900  | -0.94520500 | 0.54662700  |
| H  | 3.17094100  | -1.96354600 | 2.56151700  |
| C  | -2.64917300 | -2.04101100 | 0.77526700  |
| H  | -3.62028000 | -2.40586800 | 1.14868800  |
| H  | -1.87434000 | -2.61334500 | 1.30560400  |
| C  | -2.50514500 | -2.28875300 | -0.70594400 |
| C  | -3.20111400 | -3.29083500 | -1.37308800 |
| C  | -2.94613800 | -3.49734600 | -2.72657300 |
| H  | -3.92729100 | -3.90207900 | -0.83991700 |
| C  | -1.36810700 | -1.70337200 | -2.63824100 |
| C  | -2.01102400 | -2.69397200 | -3.37158900 |
| H  | -3.47636000 | -4.27567900 | -3.27104600 |
| H  | -0.63247700 | -1.02790300 | -3.07488400 |
| H  | -1.78622300 | -2.82517600 | -4.42669500 |
| Cu | -0.81537200 | 0.10921100  | -0.19031000 |
| N  | -1.61104100 | -1.50713300 | -1.33671500 |
| O  | 0.36154400  | 0.83729400  | -1.48929200 |
| O  | 1.66511800  | 0.34099700  | -1.24995000 |
| C  | 2.58134200  | 1.43058300  | -0.86763900 |
| C  | 2.70731300  | 2.38092800  | -2.05133200 |
| H  | 3.05990200  | 1.85218700  | -2.94274100 |
| H  | 1.73200500  | 2.82581800  | -2.27888900 |
| H  | 3.41793900  | 3.18426200  | -1.82712900 |
| C  | 2.04913300  | 2.16303800  | 0.35255200  |
| H  | 1.97877000  | 1.50914000  | 1.22922600  |
| H  | 2.69506700  | 3.00986300  | 0.60934500  |
| H  | 1.05095200  | 2.55669600  | 0.13741700  |
| C  | 3.87108600  | 0.67110900  | -0.61341300 |
| C  | 4.60769600  | 0.81320700  | 0.56616600  |
| C  | 4.33687200  | -0.21941600 | -1.58993000 |
| C  | 5.78304800  | 0.09017900  | 0.76199700  |
| H  | 4.27385200  | 1.50043600  | 1.34181000  |
| C  | 5.50304100  | -0.94948700 | -1.39053000 |
| H  | 3.76663200  | -0.34680100 | -2.50854300 |
| C  | 6.23217000  | -0.79537900 | -0.21290100 |

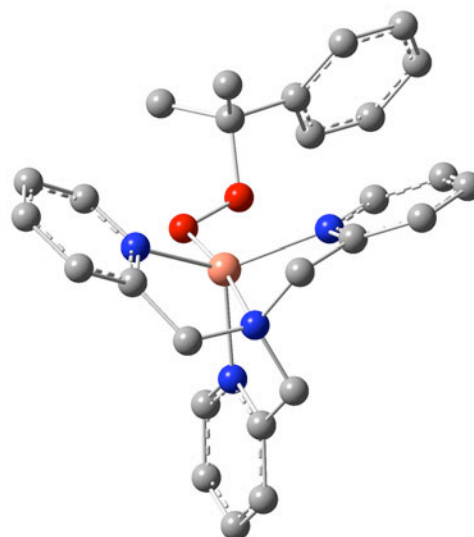

|   |            |             |             |
|---|------------|-------------|-------------|
| H | 6.35067600 | 0.22473100  | 1.68120800  |
| H | 5.84745900 | -1.63830700 | -2.15969300 |
| H | 7.15021700 | -1.35927400 | -0.05918800 |

7b

Energy: -1612.79060311 a.u.

|    |             |             |             |
|----|-------------|-------------|-------------|
| C  | 0.90822900  | -2.25278000 | -0.05084500 |
| C  | 0.98981300  | -3.62397500 | -0.26393200 |
| C  | 0.08891900  | -4.22131700 | -1.13816800 |
| C  | -0.85764100 | -3.42348200 | -1.77489300 |
| C  | -0.86994500 | -2.05711800 | -1.52214200 |
| N  | 0.00364100  | -1.47852600 | -0.67219800 |
| H  | 0.11632300  | -5.29361900 | -1.31952900 |
| H  | 1.57735800  | -1.72811200 | 0.62929000  |
| H  | 1.74462100  | -4.20631700 | 0.25769200  |
| H  | -1.58260500 | -3.85346300 | -2.46380500 |
| C  | -1.81952300 | -1.12416100 | -2.22756700 |
| H  | -1.28433800 | -0.65650000 | -3.06575600 |
| H  | -2.66170800 | -1.68455600 | -2.66559000 |
| N  | -2.28752900 | -0.04396800 | -1.34522600 |
| C  | -2.53213800 | 1.23032600  | -2.04027700 |
| H  | -3.51305800 | 1.25080500  | -2.54264800 |
| H  | -1.77093900 | 1.32742400  | -2.82688100 |
| C  | -2.39046900 | 2.38893500  | -1.08697200 |
| C  | -3.13569500 | 3.55687800  | -1.19691200 |
| N  | -1.44660000 | 2.24169300  | -0.13736600 |
| C  | -2.88837500 | 4.60085700  | -0.30927700 |
| H  | -3.89650100 | 3.64602300  | -1.97014200 |
| C  | -1.20999400 | 3.24420100  | 0.72031600  |
| C  | -1.90784500 | 4.44396400  | 0.66546300  |
| H  | -3.45943400 | 5.52416100  | -0.37630000 |
| H  | -0.43103000 | 3.04334200  | 1.45637300  |
| H  | -1.68761700 | 5.23404700  | 1.37813400  |
| C  | -3.45804700 | -0.44221200 | -0.53343200 |
| H  | -4.21351000 | -0.94291200 | -1.16139400 |
| H  | -3.91468200 | 0.48547800  | -0.15930500 |
| C  | -3.07917000 | -1.29373100 | 0.64895200  |
| C  | -3.78237600 | -2.43490500 | 1.01735300  |
| C  | -3.38312900 | -3.12563100 | 2.15983600  |
| H  | -4.62804500 | -2.77619800 | 0.42252500  |
| C  | -1.64059500 | -1.51248700 | 2.44223800  |
| C  | -2.29517000 | -2.65700200 | 2.88841000  |
| H  | -3.91398300 | -4.02234400 | 2.47235700  |
| H  | -0.76653200 | -1.10664400 | 2.95234500  |
| H  | -1.95173100 | -3.17012200 | 3.78291300  |
| Cu | -0.64791200 | 0.36586700  | 0.07303400  |
| N  | -2.02736200 | -0.84209500 | 1.35242000  |
| O  | 0.62936000  | 0.87518400  | 1.38819000  |
| O  | 1.91231200  | 0.36333600  | 1.09162900  |
| C  | 2.77376300  | 1.39591800  | 0.49559800  |
| C  | 2.10017600  | 1.98295100  | -0.74005900 |
| H  | 1.77843600  | 1.19165500  | -1.43054300 |
| H  | 1.22357300  | 2.57670100  | -0.45844200 |
| H  | 2.79803200  | 2.63374800  | -1.27853300 |
| C  | 3.01325600  | 2.47171100  | 1.53913500  |
| H  | 3.47738100  | 2.05612600  | 2.43916800  |
| H  | 3.65353300  | 3.27043400  | 1.14786200  |
| H  | 2.05302600  | 2.91136200  | 1.82623900  |

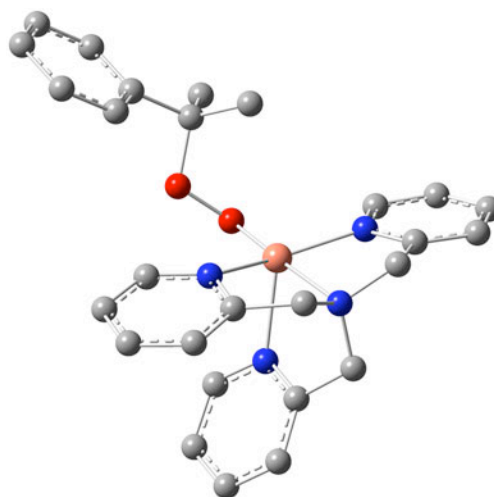

|   |            |             |             |
|---|------------|-------------|-------------|
| C | 4.00862400 | 0.59800500  | 0.11569800  |
| C | 5.27580000 | 0.88789200  | 0.62500100  |
| C | 3.87964000 | -0.47044700 | -0.78099500 |
| C | 6.38457200 | 0.13379500  | 0.24556400  |
| H | 5.40994300 | 1.71251700  | 1.32180600  |
| C | 4.98150800 | -1.23060600 | -1.15404500 |
| H | 2.89749000 | -0.70671600 | -1.19125800 |
| C | 6.24157700 | -0.92858500 | -0.64079600 |
| H | 7.36485100 | 0.37924300  | 0.64949800  |
| H | 4.85934100 | -2.05771100 | -1.85172300 |
| H | 7.10825100 | -1.51788600 | -0.93382800 |

7c

Energy: -1612.79286012 a.u.

|    |             |             |             |
|----|-------------|-------------|-------------|
| C  | -2.08887200 | -2.45578300 | -0.93292000 |
| C  | -3.26149400 | -3.16270400 | -1.16369600 |
| C  | -4.39511400 | -2.45959000 | -1.56001000 |
| C  | -4.31160000 | -1.08025000 | -1.72504300 |
| C  | -3.09666000 | -0.44473300 | -1.49178000 |
| N  | -2.00671500 | -1.12710800 | -1.09645900 |
| H  | -5.33592600 | -2.97713200 | -1.73439800 |
| H  | -1.17269100 | -2.93219400 | -0.58360200 |
| H  | -3.28427700 | -4.23990400 | -1.02254800 |
| H  | -5.17904300 | -0.49916500 | -2.03351800 |
| C  | -2.90664300 | 1.03144700  | -1.73892400 |
| H  | -2.59349800 | 1.16361500  | -2.78387900 |
| H  | -3.86544700 | 1.56425800  | -1.63824100 |
| N  | -1.87374200 | 1.63072200  | -0.87467400 |
| C  | -0.97088000 | 2.55316100  | -1.57680700 |
| H  | -1.42960600 | 3.54230800  | -1.74296600 |
| H  | -0.77416400 | 2.12427700  | -2.56941400 |
| C  | 0.33713800  | 2.69250600  | -0.84325400 |
| C  | 1.07400400  | 3.86998600  | -0.87782100 |
| N  | 0.77994400  | 1.59164000  | -0.19754300 |
| C  | 2.31615300  | 3.91344500  | -0.25010500 |
| H  | 0.67816800  | 4.73940300  | -1.39955800 |
| C  | 1.97074800  | 1.64372100  | 0.42247300  |
| C  | 2.77281100  | 2.77823300  | 0.40866800  |
| H  | 2.91185100  | 4.82339600  | -0.27268300 |
| H  | 2.27370900  | 0.72782700  | 0.92575100  |
| H  | 3.73507600  | 2.75783500  | 0.91394200  |
| C  | -2.45280500 | 2.25307700  | 0.33343400  |
| H  | -3.26629500 | 2.94764500  | 0.06510000  |
| H  | -1.65571700 | 2.84945900  | 0.80038400  |
| C  | -2.92118700 | 1.21081700  | 1.31121000  |
| C  | -4.15847000 | 1.25445300  | 1.94311200  |
| C  | -4.48252900 | 0.24281000  | 2.84530300  |
| H  | -4.85522400 | 2.06451100  | 1.73397600  |
| C  | -2.34915200 | -0.74360400 | 2.40070900  |
| C  | -3.56404000 | -0.77491300 | 3.07969700  |
| H  | -5.44408400 | 0.24860800  | 3.35417500  |
| H  | -1.59073900 | -1.51664300 | 2.52707600  |
| H  | -3.78239800 | -1.58261800 | 3.77347700  |
| Cu | -0.56281500 | 0.01661600  | -0.12895500 |
| N  | -2.03350800 | 0.22825100  | 1.54004200  |
| O  | 0.30590500  | -1.55164700 | 0.51332700  |
| O  | 1.67116200  | -1.31267400 | 0.74136400  |
| C  | 2.51124900  | -1.87331800 | -0.33819400 |

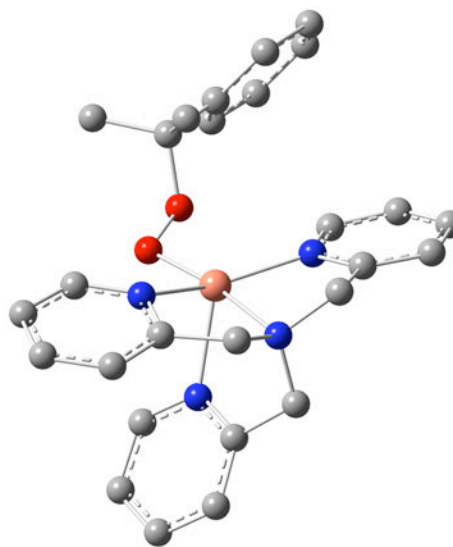

|   |            |             |             |
|---|------------|-------------|-------------|
| C | 2.49093900 | -3.38960500 | -0.20490100 |
| H | 2.85725000 | -3.70385000 | 0.77762100  |
| H | 1.46608300 | -3.75954300 | -0.32642500 |
| H | 3.12270200 | -3.85490100 | -0.96995800 |
| C | 1.97945200 | -1.44594100 | -1.69478000 |
| H | 1.94678200 | -0.35320700 | -1.79251200 |
| H | 2.61175500 | -1.84201600 | -2.49683600 |
| H | 0.96889100 | -1.84006700 | -1.84123900 |
| C | 3.86594700 | -1.28068700 | 0.00603900  |
| C | 4.63411300 | -0.56964100 | -0.91992100 |
| C | 4.34769500 | -1.41070700 | 1.31574000  |
| C | 5.85459800 | -0.00785400 | -0.54996000 |
| H | 4.28792900 | -0.45232700 | -1.94510000 |
| C | 5.55819900 | -0.83759200 | 1.68980400  |
| H | 3.75408100 | -1.95209600 | 2.05077300  |
| C | 6.31789700 | -0.13494500 | 0.75604800  |
| H | 6.44475000 | 0.53108500  | -1.28911300 |
| H | 5.91356000 | -0.94582500 | 2.71291300  |
| H | 7.27077600 | 0.30467300  | 1.04466700  |

**8) – Self – Decomposition Structures (Tpa) (structure *vii* in Figure 8)**

Energy: --1612.74308465 a.u.

|   |             |             |             |
|---|-------------|-------------|-------------|
| C | -2.13245200 | -2.22350000 | 1.12975900  |
| C | -2.92626700 | -3.29377800 | 0.73732500  |
| C | -3.09372100 | -3.53120900 | -0.62425100 |
| C | -2.45544500 | -2.70420700 | -1.54453400 |
| C | -1.66855300 | -1.65872200 | -1.07267900 |
| N | -1.52403300 | -1.42880600 | 0.24287600  |
| H | -3.71584000 | -4.35461900 | -0.96834400 |
| H | -1.95229400 | -1.97252000 | 2.17531200  |
| H | -3.40444700 | -3.92229600 | 1.48369700  |
| H | -2.56167000 | -2.86920300 | -2.61522600 |
| C | -0.84725200 | -0.77440100 | -1.97707800 |
| H | 0.15362700  | -1.22267100 | -2.06408000 |
| H | -1.27242800 | -0.74107800 | -2.99325600 |
| N | -0.66849400 | 0.58131100  | -1.42251100 |
| C | 0.62262400  | 1.19542900  | -1.79105600 |
| H | 0.60863600  | 1.58653000  | -2.82124000 |
| H | 1.38586800  | 0.40472300  | -1.75090200 |
| C | 1.01392200  | 2.26364800  | -0.80177500 |
| C | 1.92268100  | 3.27125000  | -1.10824800 |
| N | 0.50603000  | 2.12651400  | 0.43347900  |
| C | 2.33008500  | 4.13476600  | -0.09570400 |
| H | 2.31305300  | 3.36702100  | -2.11993500 |
| C | 0.90742500  | 2.94339800  | 1.41255900  |
| C | 1.82137700  | 3.96568600  | 1.18914800  |
| H | 3.04265000  | 4.92905400  | -0.30757700 |
| H | 0.48659000  | 2.73367900  | 2.39438100  |
| H | 2.12581200  | 4.61327600  | 2.00690300  |
| C | -1.79780800 | 1.48129000  | -1.75217800 |
| H | -2.03957400 | 1.41347800  | -2.82527900 |
| H | -1.45142300 | 2.50537800  | -1.55824600 |
| C | -3.00835800 | 1.21518900  | -0.89976700 |
| C | -4.27790700 | 1.02777800  | -1.43557100 |
| C | -5.34713000 | 0.81729200  | -0.56709900 |
| H | -4.42759400 | 1.04786100  | -2.51402700 |
| C | -3.80244000 | 0.99007300  | 1.24900800  |
| C | -5.10770400 | 0.80035700  | 0.80218100  |

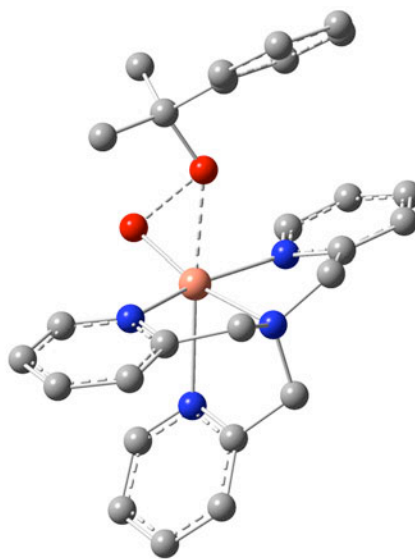

|    |             |             |             |
|----|-------------|-------------|-------------|
| H  | -6.35150800 | 0.66695000  | -0.95708500 |
| H  | -3.56048100 | 0.97280100  | 2.31211700  |
| H  | -5.91317700 | 0.64162600  | 1.51469000  |
| Cu | -0.56587000 | 0.35568500  | 0.69522100  |
| N  | -2.77209600 | 1.19516400  | 0.42374200  |
| O  | -0.06228400 | 0.00463300  | 2.41406200  |
| O  | 1.53059100  | -0.36515200 | 0.85253500  |
| C  | 2.29886500  | -1.42096600 | 1.35113200  |
| C  | 2.87470200  | -1.09034900 | 2.72232500  |
| H  | 3.42967500  | -0.14694400 | 2.70516700  |
| H  | 2.04887500  | -0.98175100 | 3.43391200  |
| H  | 3.54670200  | -1.88203600 | 3.07340200  |
| C  | 1.50209300  | -2.71681800 | 1.39863300  |
| H  | 1.03235500  | -2.93683000 | 0.43212100  |
| H  | 2.12712100  | -3.56908500 | 1.69070800  |
| H  | 0.70764400  | -2.59524200 | 2.14302400  |
| C  | 3.34579300  | -1.36938700 | 0.22651700  |
| C  | 3.52438700  | -2.41316500 | -0.68964600 |
| C  | 4.07769600  | -0.18073000 | 0.05332500  |
| C  | 4.45885500  | -2.29453600 | -1.71367700 |
| H  | 2.96457500  | -3.33933300 | -0.57955600 |
| C  | 4.99588200  | -0.05871600 | -0.98155000 |
| H  | 3.90807300  | 0.65080000  | 0.73579600  |
| C  | 5.19242700  | -1.11807000 | -1.86682000 |
| H  | 4.61974700  | -3.12843300 | -2.39438200 |
| H  | 5.56352500  | 0.86283300  | -1.09727700 |
| H  | 5.91716900  | -1.02959900 | -2.67379300 |

## 9) – Cyclohexadiene (CHD) Oxidation (Tpa)

### 9a (structure *viii* in Figure 8)

Energy: -1846.15236083 a.u.

|   |             |             |             |
|---|-------------|-------------|-------------|
| C | 1.72951600  | -1.33066500 | 2.49124600  |
| C | 2.70090400  | -2.15976300 | 3.03667700  |
| C | 4.03844800  | -1.80664800 | 2.89194900  |
| C | 4.35006600  | -0.63071200 | 2.21621000  |
| C | 3.32329500  | 0.15800300  | 1.70926300  |
| N | 2.02563900  | -0.19184200 | 1.84010700  |
| H | 4.82835100  | -2.43805800 | 3.29285300  |
| H | 0.66740000  | -1.57313600 | 2.54019700  |
| H | 2.40826100  | -3.06952000 | 3.55434400  |
| H | 5.38508300  | -0.32018300 | 2.08132900  |
| C | 3.61061100  | 1.48745400  | 1.04833700  |
| H | 3.50061900  | 2.27227200  | 1.80983500  |
| H | 4.66394500  | 1.52148800  | 0.72013900  |
| N | 2.69064900  | 1.79819800  | -0.04737400 |
| C | 2.24004300  | 3.18813800  | -0.11862400 |
| H | 2.92789900  | 3.83093200  | -0.69487400 |
| H | 2.23150000  | 3.58312200  | 0.90688700  |
| C | 0.83878500  | 3.29890200  | -0.67369300 |
| C | 0.43500200  | 4.39287600  | -1.43155900 |
| N | -0.02154700 | 2.31440800  | -0.33712200 |
| C | -0.89338000 | 4.49163700  | -1.83625500 |
| H | 1.15858000  | 5.16272100  | -1.69467300 |
| C | -1.30294300 | 2.41330700  | -0.73011000 |
| C | -1.78176100 | 3.48449800  | -1.47157200 |
| H | -1.22670300 | 5.34111700  | -2.42825800 |

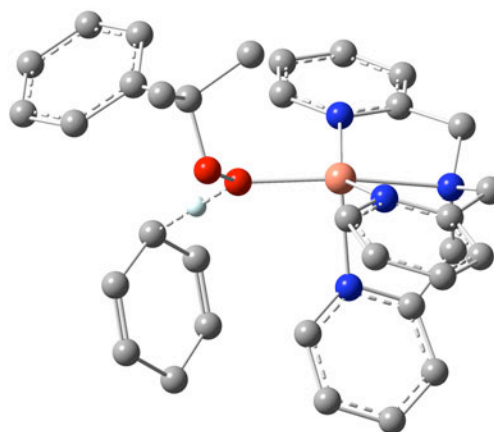

|    |             |             |             |
|----|-------------|-------------|-------------|
| H  | -1.94909900 | 1.58933300  | -0.42239100 |
| H  | -2.82977700 | 3.51728800  | -1.75993200 |
| C  | 3.14077700  | 1.28256700  | -1.34550500 |
| H  | 4.18387800  | 1.57827300  | -1.55606600 |
| H  | 2.51095500  | 1.75412100  | -2.11443700 |
| C  | 2.97836800  | -0.21225600 | -1.44763200 |
| C  | 3.97703600  | -1.04821900 | -1.93505800 |
| C  | 3.72757400  | -2.41652300 | -2.01649700 |
| H  | 4.93566100  | -0.63338900 | -2.24268500 |
| C  | 1.54159300  | -1.99416800 | -1.14120100 |
| C  | 2.48681100  | -2.89991900 | -1.61396500 |
| H  | 4.49459300  | -3.09454200 | -2.38485400 |
| H  | 0.55046500  | -2.31438800 | -0.81027300 |
| H  | 2.25252100  | -3.96127800 | -1.65519100 |
| Cu | 0.78787300  | 0.60205900  | 0.40647000  |
| N  | 1.78020100  | -0.68133400 | -1.05586600 |
| O  | -0.94208700 | -0.49879300 | 0.40936600  |
| O  | -1.36627600 | -1.24292200 | 1.57838800  |
| C  | -2.29363700 | -0.42413700 | 2.35903500  |
| C  | -1.59759600 | 0.85377500  | 2.79750800  |
| H  | -0.67257200 | 0.60588100  | 3.33141400  |
| H  | -1.33638400 | 1.49189200  | 1.94552200  |
| H  | -2.23322600 | 1.43314200  | 3.47712700  |
| C  | -0.73331100 | -1.40482800 | -3.59863100 |
| C  | -1.64998400 | -3.42896700 | -2.46090900 |
| C  | -2.38638000 | -2.62417500 | -1.66039500 |
| C  | -1.47632600 | -0.62921400 | -2.77722300 |
| H  | -0.12723500 | -0.94781700 | -4.38073700 |
| H  | -1.74403300 | -4.51129700 | -2.37937700 |
| H  | -3.06557500 | -3.06595700 | -0.93073900 |
| H  | -1.46020300 | 0.45463700  | -2.90758900 |
| C  | -2.28612900 | -1.17947900 | -1.70691600 |
| H  | -1.58709600 | -0.86793200 | -0.52472500 |
| H  | -3.18452000 | -0.61568200 | -1.42826400 |
| C  | -0.74197500 | -2.89541800 | -3.51970800 |
| H  | -1.01651000 | -3.32413200 | -4.50223500 |
| H  | 0.28939000  | -3.27462100 | -3.37379000 |
| C  | -3.55119200 | -0.20194400 | 1.53399200  |
| C  | -4.25370700 | -1.31560800 | 1.05724300  |
| C  | -4.02450200 | 1.06995900  | 1.20204500  |
| C  | -5.38656600 | -1.16613200 | 0.26606200  |
| H  | -3.89122500 | -2.31541400 | 1.29556000  |
| C  | -5.15859100 | 1.22555700  | 0.40444500  |
| H  | -3.51170800 | 1.95743500  | 1.57070300  |
| C  | -5.84170200 | 0.10917300  | -0.06778000 |
| H  | -5.91520100 | -2.04676700 | -0.09515800 |
| H  | -5.51363900 | 2.22602700  | 0.16169400  |
| H  | -6.72831500 | 0.22972200  | -0.68700600 |
| C  | -2.56107900 | -1.31550700 | 3.56662500  |
| H  | -3.28740900 | -0.83433000 | 4.22973900  |
| H  | -2.96534000 | -2.28826400 | 3.27050300  |
| H  | -1.63774000 | -1.48410300 | 4.13311200  |

9b

Energy: -1846.14680416 a.u.

|    |             |             |             |
|----|-------------|-------------|-------------|
| C  | -0.79657300 | 2.48219400  | -0.15649800 |
| C  | -0.88029500 | 3.81628500  | 0.22101600  |
| C  | 0.17286100  | 4.66774700  | -0.09450700 |
| C  | 1.26446500  | 4.15089400  | -0.78583100 |
| C  | 1.27163900  | 2.80779600  | -1.14569600 |
| N  | 0.25184100  | 1.97956900  | -0.83305100 |
| H  | 0.15086200  | 5.71548100  | 0.19752400  |
| H  | -1.57453000 | 1.76182400  | 0.09482000  |
| H  | -1.75351000 | 4.16949900  | 0.76360700  |
| H  | 2.11241700  | 4.78241200  | -1.04676700 |
| C  | 2.40122400  | 2.21960300  | -1.95911400 |
| H  | 2.09157100  | 2.20858300  | -3.01356900 |
| H  | 3.28646400  | 2.87678300  | -1.90243100 |
| N  | 2.71871400  | 0.84246200  | -1.57682200 |
| C  | 3.05516700  | -0.05337600 | -2.68290900 |
| H  | 4.11976500  | 0.00062200  | -2.96957800 |
| H  | 2.47799200  | 0.27518800  | -3.55855000 |
| C  | 2.67242400  | -1.47996900 | -2.37106400 |
| C  | 3.42917800  | -2.55773200 | -2.81705500 |
| N  | 1.52485000  | -1.65444100 | -1.68089700 |
| C  | 2.98972200  | -3.85347700 | -2.56207400 |
| H  | 4.35387500  | -2.37728500 | -3.36266700 |
| C  | 1.10645100  | -2.90726700 | -1.43694100 |
| C  | 1.80167300  | -4.03150000 | -1.86033700 |
| H  | 3.56841300  | -4.70908800 | -2.90270400 |
| H  | 0.17455900  | -2.98067700 | -0.87482800 |
| H  | 1.41798300  | -5.02390000 | -1.63857000 |
| C  | 3.67731000  | 0.75293900  | -0.46754500 |
| H  | 4.57642000  | 1.36358400  | -0.66332800 |
| H  | 4.00438700  | -0.29548700 | -0.40962900 |
| C  | 3.04591200  | 1.13606500  | 0.84552200  |
| C  | 3.62248500  | 2.04932700  | 1.72095800  |
| C  | 2.95765600  | 2.35583000  | 2.90642600  |
| H  | 4.57195000  | 2.52081200  | 1.47199200  |
| C  | 1.24348200  | 0.82020100  | 2.25224700  |
| C  | 1.74416600  | 1.73263400  | 3.17697300  |
| H  | 3.37889200  | 3.07754100  | 3.60316700  |
| H  | 0.29133100  | 0.30706800  | 2.41166600  |
| H  | 1.18435600  | 1.95237500  | 4.08353400  |
| Cu | 0.77157900  | -0.01475500 | -0.72521300 |
| N  | 1.87543800  | 0.52719600  | 1.11110900  |
| O  | -0.76338500 | -0.98212100 | 0.22910600  |
| O  | -2.08704000 | -0.38046000 | 0.17470500  |
| C  | -2.89496200 | -1.04316100 | -0.85531100 |
| C  | -2.19541800 | -0.93856800 | -2.20558800 |
| H  | -1.93251500 | 0.09888000  | -2.44224200 |
| H  | -1.27297500 | -1.53162200 | -2.21024700 |
| H  | -2.84687400 | -1.31362700 | -3.00298900 |
| C  | -3.09614800 | -2.49919500 | -0.47372600 |
| H  | -3.52020300 | -2.59669800 | 0.53184400  |
| H  | -3.76071700 | -3.00469700 | -1.18313100 |
| H  | -2.13286400 | -3.02078500 | -0.49134200 |
| C  | -4.16663700 | -0.20997100 | -0.81244900 |
| C  | -5.39326600 | -0.74073000 | -0.40487200 |
| C  | -4.11717100 | 1.14123000  | -1.17945400 |
| C  | -6.53836100 | 0.05189200  | -0.37495100 |
| H  | -5.46983100 | -1.78656500 | -0.11607600 |
| C  | -5.25611800 | 1.93680800  | -1.14218800 |
| H  | -3.17299000 | 1.57644100  | -1.50508800 |
| C  | -6.47396500 | 1.39256800  | -0.74010100 |

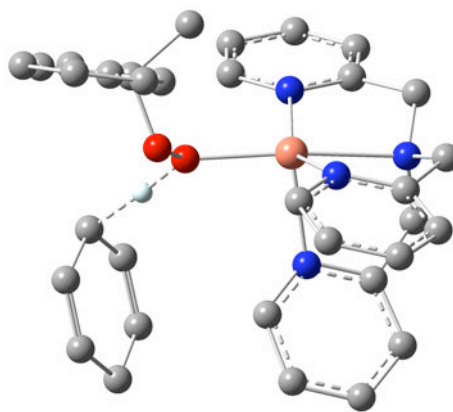



|   |             |             |             |
|---|-------------|-------------|-------------|
| H | -7.48543600 | -0.38433400 | -0.06341000 |
| H | -5.19526600 | 2.98335900  | -1.43569300 |
| H | -7.36929000 | 2.01059600  | -0.71577100 |
| C | 1.22462500  | -2.33127900 | 3.67364600  |
| C | -0.89048700 | -1.21086500 | 4.38817600  |
| C | -1.51629100 | -1.74212800 | 3.31193700  |
| C | 0.57129200  | -2.84359900 | 2.60614700  |
| H | 2.27112900  | -2.58154100 | 3.84450600  |
| H | -1.45273500 | -0.60993100 | 5.10223600  |
| H | -2.57901900 | -1.55243300 | 3.15960500  |
| H | 1.10403100  | -3.50745400 | 1.92330100  |
| C | -0.81367600 | -2.52824300 | 2.31815200  |
| H | -0.77876900 | -1.66035000 | 1.19830100  |
| H | -1.39607800 | -3.30269300 | 1.80611200  |
| C | 0.55043300  | -1.46739000 | 4.68747900  |
| H | 0.65148500  | -1.91817100 | 5.69324700  |
| H | 1.10066200  | -0.51205100 | 4.79864800  |

9c

Energy: -1846.15636108 a.u.

|   |             |             |             |
|---|-------------|-------------|-------------|
| C | -1.26146300 | -0.69252400 | 2.63393600  |
| C | -2.25303400 | -1.22612600 | 3.44701100  |
| C | -2.66561000 | -2.53565600 | 3.22211900  |
| C | -2.05760700 | -3.26449900 | 2.20424300  |
| C | -1.06293500 | -2.66572000 | 1.43833200  |
| N | -0.67653700 | -1.39038800 | 1.64548900  |
| H | -3.45011100 | -2.98420800 | 3.82775700  |
| H | -0.90877600 | 0.33357900  | 2.74740100  |
| H | -2.69602300 | -0.62004000 | 4.23306000  |
| H | -2.35099800 | -4.29322700 | 1.99979900  |
| C | -0.31143600 | -3.43694700 | 0.37588900  |
| H | 0.61860700  | -3.81309900 | 0.82541300  |
| H | -0.89120000 | -4.32727500 | 0.07606200  |
| N | 0.05475100  | -2.61211700 | -0.77632000 |
| C | 1.38868900  | -2.85578900 | -1.32393400 |
| H | 1.41747200  | -3.71655900 | -2.01513600 |
| H | 2.04825800  | -3.10367600 | -0.47944100 |
| C | 1.94161000  | -1.62557300 | -2.00284900 |
| C | 2.81537800  | -1.71466100 | -3.08139300 |
| N | 1.58482900  | -0.43741600 | -1.47635200 |
| C | 3.34029900  | -0.54857500 | -3.63037700 |
| H | 3.07757800  | -2.69130900 | -3.48494100 |
| C | 2.08885900  | 0.68360500  | -2.01198900 |
| C | 2.96768700  | 0.67645700  | -3.08657800 |
| H | 4.02312500  | -0.59702300 | -4.47582400 |
| H | 1.76510800  | 1.60832800  | -1.53356300 |
| H | 3.34843500  | 1.61292900  | -3.48615900 |
| C | -0.98584500 | -2.57294600 | -1.81263700 |
| H | -1.28841400 | -3.59071100 | -2.11679700 |
| H | -0.54398200 | -2.08746000 | -2.69473500 |
| C | -2.18012400 | -1.77313300 | -1.36108300 |
| C | -3.48178000 | -2.25705700 | -1.43323300 |
| C | -4.52282700 | -1.45936300 | -0.96273300 |
| H | -3.67464900 | -3.24802300 | -1.84140700 |
| C | -2.89533100 | 0.20794500  | -0.41940100 |
| C | -4.22475600 | -0.20573200 | -0.43999700 |
| H | -5.54946200 | -1.81815500 | -0.99512800 |
| H | -2.60651700 | 1.18170500  | -0.01519100 |

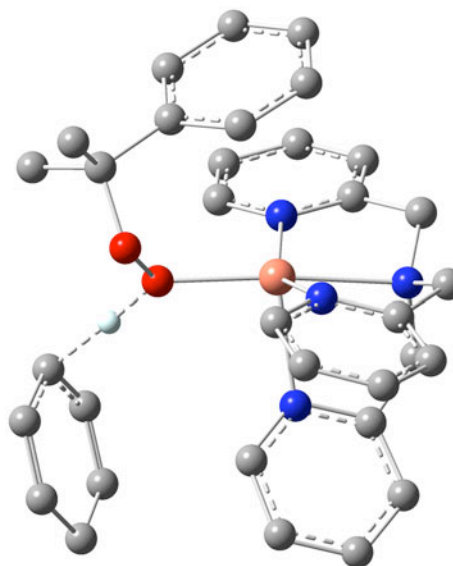



|    |             |             |             |
|----|-------------|-------------|-------------|
| H  | -5.00392900 | 0.44270500  | -0.04501900 |
| Cu | 0.16152300  | -0.46379900 | -0.01368700 |
| N  | -1.89297200 | -0.55413100 | -0.86823800 |
| O  | 0.16345800  | 1.54808500  | 0.41331900  |
| O  | 0.45464600  | 1.91930500  | 1.78929000  |
| C  | 1.86861200  | 2.25111000  | 1.91423700  |
| C  | -2.59708700 | 3.01062300  | -2.39757900 |
| C  | -3.32010000 | 3.82008900  | -0.14767100 |
| C  | -2.01984100 | 3.99569800  | 0.18726700  |
| C  | -1.30822600 | 3.19435600  | -2.02862700 |
| H  | -2.83256400 | 2.66147500  | -3.40234600 |
| H  | -4.10514700 | 4.08904100  | 0.55842200  |
| H  | -1.76675300 | 4.39712300  | 1.16937500  |
| H  | -0.51403300 | 2.99115600  | -2.74882000 |
| C  | -0.93654000 | 3.63640400  | -0.70172000 |
| H  | -0.35684800 | 2.47332400  | -0.05796700 |
| H  | -0.01528500 | 4.22247000  | -0.61786000 |
| C  | -3.74274300 | 3.33111100  | -1.49505100 |
| H  | -4.40291000 | 4.07857900  | -1.97589100 |
| H  | -4.41022100 | 2.45193500  | -1.40017300 |
| C  | 1.98652500  | 2.52645500  | 3.40985800  |
| H  | 3.02054700  | 2.78488400  | 3.66040500  |
| H  | 1.33949800  | 3.36126100  | 3.70099500  |
| H  | 1.70571300  | 1.64582000  | 3.99765300  |
| C  | 2.70666200  | 1.04589300  | 1.51226800  |
| C  | 3.80420100  | 1.13456300  | 0.65399800  |
| C  | 2.36951600  | -0.21094600 | 2.02915100  |
| C  | 4.53590100  | -0.00186200 | 0.30821400  |
| H  | 4.09880100  | 2.09766900  | 0.23949100  |
| C  | 3.09407300  | -1.34782200 | 1.68584400  |
| H  | 1.52261600  | -0.29366300 | 2.70901600  |
| C  | 4.18058000  | -1.24737700 | 0.81666100  |
| H  | 5.38786200  | 0.09074200  | -0.36365300 |
| H  | 2.81709700  | -2.31243200 | 2.11274600  |
| H  | 4.75805000  | -2.13226800 | 0.55206400  |
| C  | 2.16807100  | 3.50700100  | 1.11419000  |
| H  | 1.46753600  | 4.29957500  | 1.39948100  |
| H  | 3.18307000  | 3.86966300  | 1.31027000  |
| H  | 2.07268900  | 3.33056900  | 0.03645700  |

9d

Energy: -1846.14697952 a.u.

|    |             |             |             |
|----|-------------|-------------|-------------|
| C  | -1.47205000 | 1.86059000  | 1.59716600  |
| C  | -2.37876700 | 2.81632300  | 2.03581100  |
| C  | -3.67255600 | 2.41041300  | 2.34773400  |
| C  | -3.99902400 | 1.06262100  | 2.22587900  |
| C  | -3.03108500 | 0.16361400  | 1.79070000  |
| N  | -1.78391700 | 0.56136600  | 1.46647200  |
| H  | -4.41774200 | 3.13000300  | 2.67987200  |
| H  | -0.45338700 | 2.12778600  | 1.31064900  |
| H  | -2.07190300 | 3.85634100  | 2.12129900  |
| H  | -4.99969200 | 0.70541100  | 2.46499900  |
| C  | -3.30285300 | -1.32236200 | 1.72253200  |
| H  | -2.93594500 | -1.77508000 | 2.65430900  |
| H  | -4.39044300 | -1.50684300 | 1.69889600  |
| N  | -2.61723000 | -1.97674700 | 0.60564000  |
| C  | -1.99445200 | -3.26128100 | 0.91754900  |
| H  | -2.70995800 | -4.10212200 | 0.89506500  |
| H  | -1.61674300 | -3.19720900 | 1.94821100  |
| C  | -0.82866800 | -3.54852100 | 0.00309200  |
| C  | -0.51984800 | -4.84548900 | -0.39029800 |
| N  | -0.06566000 | -2.49237500 | -0.35630400 |
| C  | 0.61913300  | -5.07359700 | -1.15670700 |
| H  | -1.16735600 | -5.66742600 | -0.08950000 |
| C  | 1.03573800  | -2.71811400 | -1.09535500 |
| C  | 1.41446700  | -3.98894600 | -1.50864200 |
| H  | 0.87832800  | -6.08164000 | -1.47286300 |
| H  | 1.62530700  | -1.83414700 | -1.33169800 |
| H  | 2.31755600  | -4.11567800 | -2.09965200 |
| C  | -3.42794700 | -2.02510900 | -0.61519800 |
| H  | -4.41181300 | -2.49229700 | -0.43083200 |
| H  | -2.89406100 | -2.66464000 | -1.33354000 |
| C  | -3.59308300 | -0.65215500 | -1.20811200 |
| C  | -4.83137900 | -0.13947600 | -1.57907600 |
| C  | -4.89906400 | 1.14644200  | -2.10948300 |
| H  | -5.72999900 | -0.74042600 | -1.44881500 |
| C  | -2.52693000 | 1.28199700  | -1.86206100 |
| C  | -3.72324900 | 1.87469600  | -2.25230300 |
| H  | -5.85625500 | 1.57308700  | -2.40139800 |
| H  | -1.57767400 | 1.81048800  | -1.95302200 |
| H  | -3.72680300 | 2.88288300  | -2.65900800 |
| Cu | -0.84264400 | -0.64240200 | 0.03132300  |
| N  | -2.45199000 | 0.04928600  | -1.34899000 |
| O  | 0.64046600  | 0.73608600  | -0.35899100 |
| O  | 1.97177700  | 0.16381500  | -0.40158500 |
| C  | 2.61026900  | 0.23494300  | 0.91981900  |
| C  | 2.78121500  | 1.68729300  | 1.34151600  |
| H  | 3.43379600  | 2.22808700  | 0.65047200  |
| H  | 1.80870800  | 2.19786800  | 1.36402900  |
| H  | 3.21938700  | 1.74125800  | 2.34458900  |
| C  | 1.77216200  | -0.51419400 | 1.94212000  |
| H  | 1.58349800  | -1.54854700 | 1.63178000  |
| H  | 2.27471500  | -0.53096700 | 2.91604400  |
| H  | 0.80663000  | -0.01263100 | 2.07667500  |
| C  | 3.94465800  | -0.42339100 | 0.60996500  |
| C  | 4.38764000  | -1.57072100 | 1.27227400  |
| C  | 4.75489100  | 0.12778300  | -0.39172500 |
| C  | 5.61820600  | -2.14260700 | 0.95591300  |
| H  | 3.78031500  | -2.02247600 | 2.05410600  |
| C  | 5.97735000  | -0.44846400 | -0.71589000 |
| H  | 4.41173200  | 1.01331200  | -0.92664000 |
| C  | 6.41518200  | -1.58535200 | -0.03893900 |

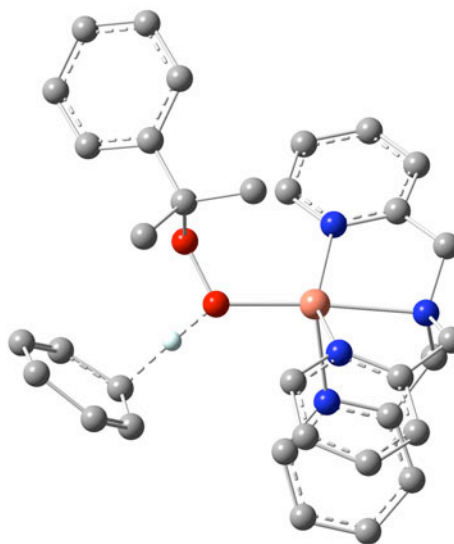

|   |             |             |             |
|---|-------------|-------------|-------------|
| H | 5.95369400  | -3.02845400 | 1.49211700  |
| H | 6.59314600  | -0.00734100 | -1.49754900 |
| H | 7.37592300  | -2.03305400 | -0.28571700 |
| C | 3.02579100  | 4.09060000  | -1.14100700 |
| C | 2.27872700  | 3.21070500  | -1.84750500 |
| C | 0.24153200  | 3.97709000  | -0.69612400 |
| C | 0.96198300  | 4.84721700  | 0.04626000  |
| H | 4.08891600  | 4.19961300  | -1.35415100 |
| H | 2.74472000  | 2.61142400  | -2.62961600 |
| H | -0.84726800 | 3.96541200  | -0.60510900 |
| H | 0.46016600  | 5.53367800  | 0.72798400  |
| C | 0.86655300  | 3.02333800  | -1.59271400 |
| H | 0.27174600  | 2.69313300  | -2.45271700 |
| H | 0.76874900  | 1.77178400  | -0.90526100 |
| C | 2.44831100  | 4.95150800  | -0.06566600 |
| H | 2.92129000  | 4.70943800  | 0.90746200  |
| H | 2.74189500  | 6.00534600  | -0.22210800 |

9e

Energy: -1846.15326491 a.u.

|   |             |             |             |
|---|-------------|-------------|-------------|
| C | 1.64164500  | 1.30850500  | 1.58710900  |
| C | 2.34429500  | 2.33392200  | 2.20558200  |
| C | 1.64334400  | 3.46312500  | 2.61725500  |
| C | 0.26796200  | 3.51097100  | 2.40787900  |
| C | -0.36533900 | 2.43942400  | 1.78650200  |
| N | 0.31834500  | 1.35484100  | 1.36969700  |
| H | 2.15748500  | 4.29547000  | 3.09297700  |
| H | 2.14726300  | 0.41201900  | 1.22341600  |
| H | 3.41861300  | 2.24452000  | 2.34933400  |
| H | -0.31587600 | 4.37546600  | 2.72083900  |
| C | -1.86671100 | 2.39940000  | 1.60835800  |
| H | -2.29085400 | 1.83050300  | 2.44794100  |
| H | -2.28257700 | 3.41922600  | 1.68478800  |
| N | -2.27451000 | 1.73518400  | 0.37056600  |
| C | -3.44339400 | 0.86514900  | 0.48049400  |
| H | -4.39660300 | 1.42018100  | 0.42560000  |
| H | -3.40579400 | 0.38920600  | 1.47102400  |
| C | -3.41840300 | -0.22578800 | -0.56213200 |
| C | -4.59425000 | -0.75615200 | -1.08245100 |
| N | -2.20647100 | -0.69382300 | -0.92482600 |
| C | -4.52446100 | -1.80275800 | -1.99624100 |
| H | -5.55375100 | -0.34693200 | -0.77049800 |
| C | -2.14261500 | -1.70239200 | -1.80975800 |
| C | -3.27366600 | -2.28398700 | -2.36745500 |
| H | -5.43284300 | -2.22909700 | -2.41647100 |
| H | -1.13731300 | -2.04751100 | -2.04738900 |
| H | -3.16863400 | -3.09625800 | -3.08211200 |
| C | -2.36358900 | 2.65372200  | -0.77026900 |
| H | -3.01355500 | 3.51731000  | -0.54181200 |
| H | -2.83570700 | 2.10036900  | -1.59473800 |
| C | -0.99978400 | 3.11463200  | -1.20879200 |
| C | -0.68243500 | 4.45808200  | -1.37988100 |
| C | 0.60907200  | 4.80244900  | -1.77171700 |
| H | -1.43701200 | 5.22285000  | -1.20190700 |
| C | 1.12898300  | 2.47128300  | -1.79961600 |
| C | 1.53684300  | 3.78882500  | -1.98349700 |
| H | 0.88555500  | 5.84621600  | -1.90458200 |
| H | 1.81749500  | 1.64018600  | -1.95532200 |

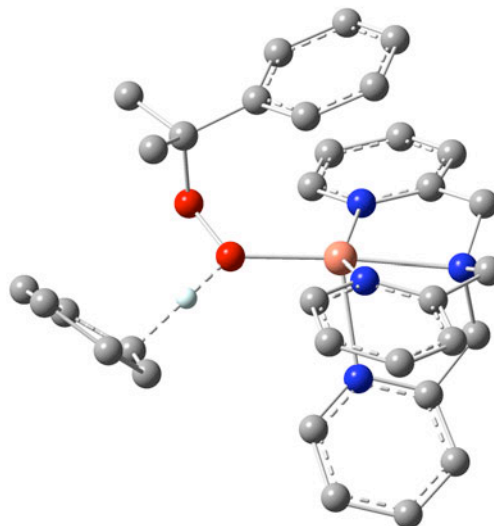

|    |             |             |             |
|----|-------------|-------------|-------------|
| H  | 2.55708500  | 4.00850600  | -2.28891900 |
| Cu | -0.58416800 | 0.28001400  | -0.17541700 |
| N  | -0.10557300 | 2.13040200  | -1.41729200 |
| O  | 1.07472100  | -0.88929300 | -0.60188100 |
| O  | 0.87026700  | -2.28078900 | -0.94864700 |
| C  | 0.85408500  | -3.12566300 | 0.25347000  |
| C  | 2.12156500  | -2.92259700 | 1.06760400  |
| H  | 2.99385800  | -3.23455600 | 0.48507600  |
| H  | 2.26752000  | -1.87284200 | 1.34275700  |
| H  | 2.08125500  | -3.51427300 | 1.98905800  |
| C  | 4.96867300  | -2.32760700 | -0.96000700 |
| C  | 4.01381400  | -1.80840700 | -1.76697900 |
| C  | 4.16452100  | 0.35158500  | -0.59912800 |
| C  | 5.10011000  | -0.14323000 | 0.24290200  |
| H  | 5.34652400  | -3.33384400 | -1.13828200 |
| H  | 3.62050500  | -2.40330100 | -2.59089800 |
| H  | 3.89520000  | 1.40919300  | -0.53943500 |
| H  | 5.58491100  | 0.50888000  | 0.96933500  |
| C  | 3.47542900  | -0.48097800 | -1.56435100 |
| H  | 3.09022100  | 0.01697300  | -2.46177300 |
| H  | 2.15565900  | -0.70280900 | -1.00010100 |
| C  | 5.55362100  | -1.56574200 | 0.18392300  |
| H  | 5.32261700  | -2.08041200 | 1.13890300  |
| H  | 6.65727400  | -1.60898700 | 0.14747800  |
| C  | 0.86099500  | -4.50898200 | -0.38299400 |
| H  | 0.73507800  | -5.28302200 | 0.38159500  |
| H  | 0.06081100  | -4.62124400 | -1.12229900 |
| H  | 1.81346000  | -4.67587400 | -0.89604500 |
| C  | -0.41357200 | -2.82787500 | 1.04478100  |
| C  | -0.42980400 | -1.80602400 | 2.00170200  |
| C  | -1.60944500 | -3.51449800 | 0.80299700  |
| C  | -1.59693500 | -1.47798800 | 2.68948000  |
| H  | 0.48539500  | -1.26274500 | 2.22725300  |
| C  | -2.77876100 | -3.19188400 | 1.48634300  |
| H  | -1.63696000 | -4.32201700 | 0.07381100  |
| C  | -2.77801900 | -2.17059800 | 2.43397600  |
| H  | -1.57143000 | -0.69170200 | 3.44475400  |
| H  | -3.69152200 | -3.75101400 | 1.28615500  |
| H  | -3.68756300 | -1.93216600 | 2.98427200  |

9f

Energy: -1846.14536742 a.u.

|   |             |             |            |
|---|-------------|-------------|------------|
| C | -0.43539900 | -1.99008000 | 1.18532700 |
| C | -0.53320900 | -3.31404400 | 1.59286500 |
| C | 0.55955900  | -3.90015600 | 2.22234800 |
| C | 1.70439600  | -3.13325600 | 2.42144100 |
| C | 1.72513100  | -1.81252900 | 1.98758500 |
| N | 0.66613500  | -1.24415700 | 1.37186200 |
| H | 0.52640100  | -4.93736600 | 2.54876600 |
| H | -1.26324900 | -1.49550600 | 0.67758800 |
| H | -1.45160200 | -3.86646400 | 1.40817400 |
| H | 2.58247300  | -3.55370600 | 2.90925800 |
| C | 2.91385400  | -0.91479800 | 2.23021100 |
| H | 2.68298200  | -0.26720900 | 3.08773200 |
| H | 3.79202000  | -1.51812300 | 2.51980300 |
| N | 3.19566700  | -0.04774600 | 1.08711400 |
| C | 3.66395100  | 1.29625500  | 1.42283200 |
| H | 4.74735000  | 1.33654000  | 1.63112000 |

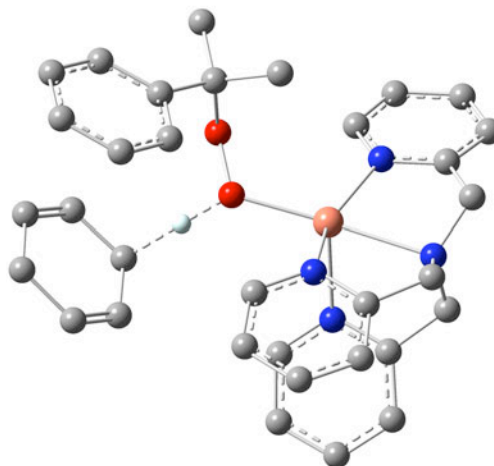

|    |             |             |             |
|----|-------------|-------------|-------------|
| H  | 3.15328700  | 1.59684300  | 2.34890800  |
| C  | 3.30548500  | 2.28024300  | 0.33684200  |
| C  | 4.16051100  | 3.31389100  | -0.02772700 |
| N  | 2.08826900  | 2.12837600  | -0.22904600 |
| C  | 3.75147900  | 4.22991600  | -0.99266200 |
| H  | 5.13689100  | 3.39756100  | 0.44665900  |
| C  | 1.69795600  | 3.01392400  | -1.16200100 |
| C  | 2.49468000  | 4.07718800  | -1.56799200 |
| H  | 4.40617900  | 5.04545500  | -1.29175400 |
| H  | 0.70110200  | 2.84669100  | -1.56866600 |
| H  | 2.13184000  | 4.76623500  | -2.32620800 |
| C  | 4.01208600  | -0.69497700 | 0.05561300  |
| H  | 4.87614600  | -1.22229900 | 0.49720800  |
| H  | 4.42008100  | 0.10302700  | -0.58211700 |
| C  | 3.21403600  | -1.62883500 | -0.81922700 |
| C  | 3.68582100  | -2.88403600 | -1.18980500 |
| C  | 2.92043600  | -3.66831700 | -2.04921400 |
| H  | 4.64198200  | -3.24025700 | -0.80959400 |
| C  | 1.31236200  | -1.90389800 | -2.09248300 |
| C  | 1.70961200  | -3.16786300 | -2.51548300 |
| H  | 3.26633700  | -4.65519500 | -2.34913000 |
| H  | 0.37134300  | -1.46307400 | -2.42411900 |
| H  | 1.08115200  | -3.74147500 | -3.19254600 |
| Cu | 1.14014600  | 0.35038100  | 0.10940200  |
| N  | 2.03709500  | -1.14781000 | -1.26069900 |
| O  | -0.79676600 | 0.55364200  | -0.57499300 |
| O  | -1.25426900 | 1.89030400  | -0.88357500 |
| C  | -1.89031200 | 2.52300700  | 0.28191600  |
| C  | -4.74335000 | -0.78623200 | -1.58183100 |
| C  | -3.63205200 | -0.21358800 | -2.09801400 |
| C  | -2.34597500 | -2.26682500 | -1.66343500 |
| C  | -3.43559500 | -2.86028000 | -1.12602300 |
| H  | -5.68505400 | -0.23980500 | -1.57857800 |
| H  | -3.68488400 | 0.79474200  | -2.50889000 |
| H  | -1.42099500 | -2.84119600 | -1.75652000 |
| H  | -3.38702800 | -3.90033900 | -0.80256200 |
| C  | -2.34858400 | -0.88319600 | -2.10030400 |
| H  | -1.68571800 | -0.63625300 | -2.94012700 |
| H  | -1.54448600 | -0.13200000 | -1.20077800 |
| C  | -4.75086400 | -2.16602700 | -1.01638000 |
| H  | -5.08232700 | -2.13328800 | 0.03976400  |
| H  | -5.53754100 | -2.77406400 | -1.50126000 |
| C  | -2.22593000 | 3.88643500  | -0.30577000 |
| H  | -2.75337100 | 4.50085800  | 0.43134100  |
| H  | -1.30589300 | 4.40938700  | -0.58828400 |
| H  | -2.85244900 | 3.79723800  | -1.19920400 |
| C  | -0.87198200 | 2.67908000  | 1.40472700  |
| H  | -1.33950800 | 3.14259200  | 2.28113100  |
| H  | -0.45883400 | 1.71210800  | 1.71793100  |
| H  | -0.03883400 | 3.31334000  | 1.08085900  |
| C  | -3.10941900 | 1.73769400  | 0.73863700  |
| C  | -4.41243800 | 2.15076900  | 0.44395700  |
| C  | -2.94685100 | 0.57250600  | 1.49962000  |
| C  | -5.51428500 | 1.42837400  | 0.89517900  |
| H  | -4.58295200 | 3.05730800  | -0.13293300 |
| C  | -4.04329300 | -0.16445500 | 1.93332500  |
| H  | -1.94569800 | 0.24926100  | 1.77479700  |
| C  | -5.33530000 | 0.26413900  | 1.63613300  |
| H  | -6.51861400 | 1.78193100  | 0.66794600  |
| H  | -3.88658100 | -1.06819600 | 2.52281400  |

H            -6.19716200   -0.29873200   1.99149200

## II – Calculated UV-Vis Spectra

TD-DFT spectra (see Computational Methods section for details) generated by applying Gaussian broadening to computed peak positions and scaling arbitrary absorption intensities to predicted oscillator strengths.

### a) $[\text{Cu}^{\text{II}}(\text{bpa})(\text{CH}_3\text{CN})(\text{O}_2\text{Cm})]^+$

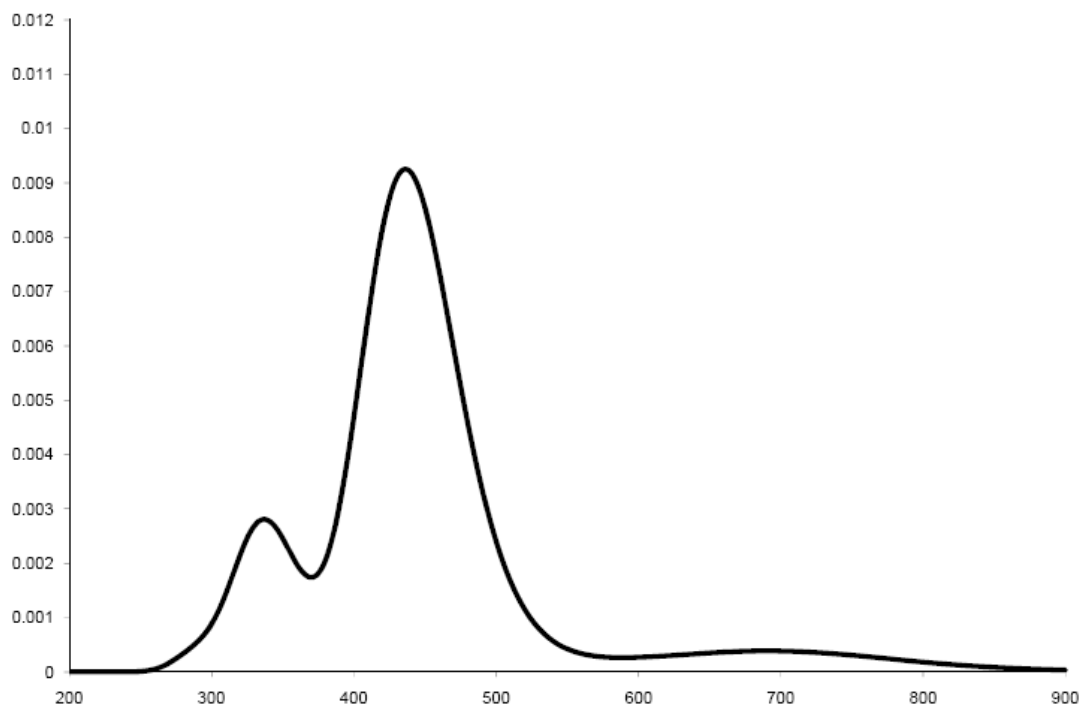

### b) $[\text{Cu}^{\text{II}}(\text{bpa})(\text{O}_2\text{Cm})]^+$

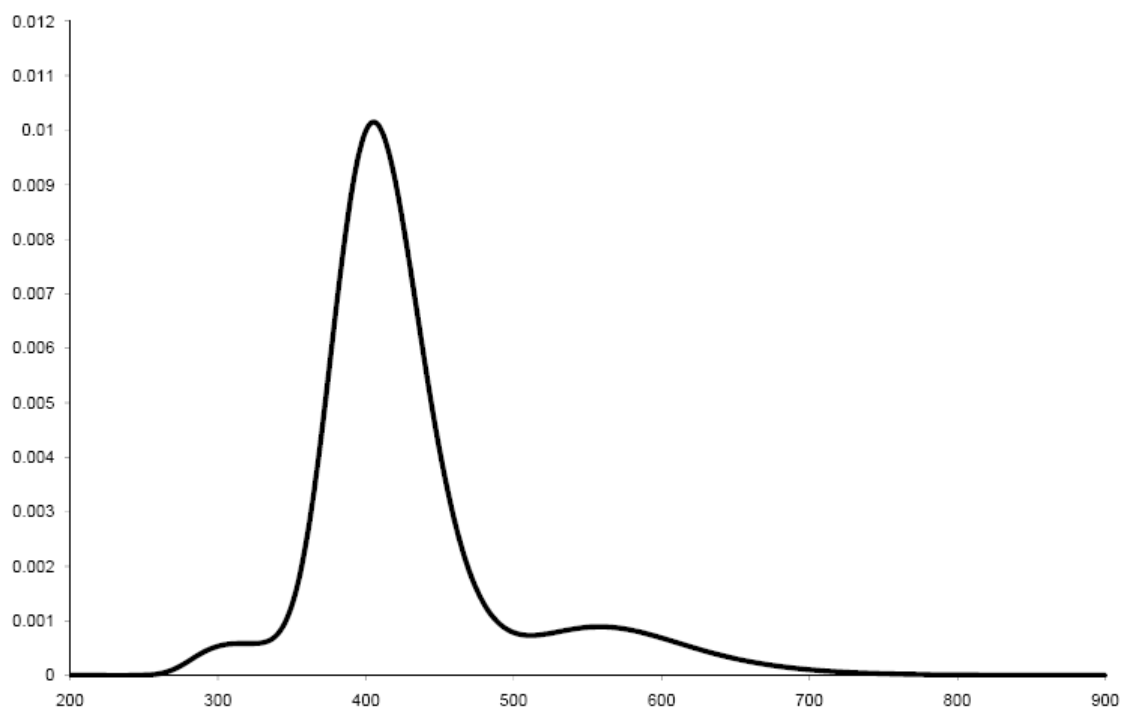

c)  $[\text{Cu}^{\text{II}}(\text{tpa})(\text{O}_2\text{Cm})]^+$

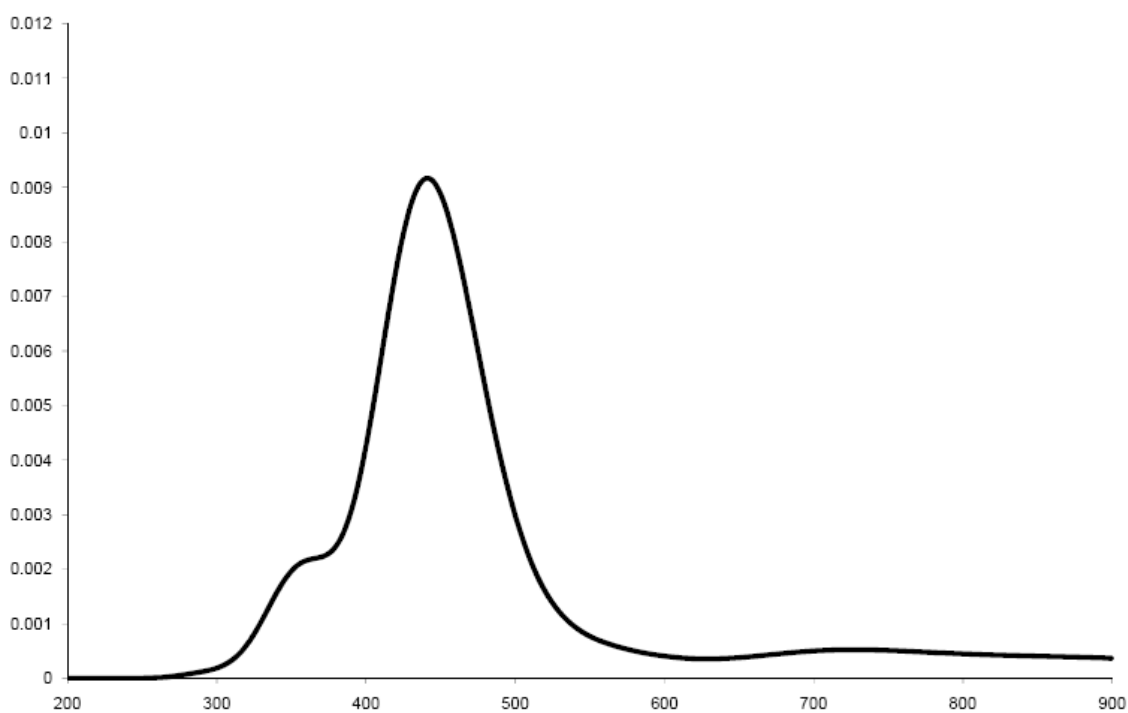

III - Selected M06-L vibrational frequencies ( $\text{cm}^{-1}$ ) with mode assignment and  $^{18}\text{O}_2$  isotope shift

**a) Computed for structure *i***

896.5 ( $\Delta\nu = 32.7$ ) — mixed O–O stretching mode

812.4 ( $\Delta\nu = 15.4$ ) — mixed O–O stretching mode

619.4 ( $\Delta\nu = 7.4$ ) — C–C–O deformation mode

499 ( $\Delta\nu = 16$ ) — Cu–O stretching mode

**b) Computed for structure *ii***

903.4 ( $\Delta\nu = 41.6$ ) — mixed O–O stretching mode

833.4 ( $\Delta\nu = 17.2$ ) — mixed O–O stretching mode

604.8 ( $\Delta\nu = 7.9$ ) — C–C–O deformation mode

515.7 ( $\Delta\nu = 15.7$ ) — Cu–O stretching mode
